# Supplementary material for: Direct acylation and alkynylation of hydrocarbons via synergistic decatungstate photo-HAT/nickel catalysis
Source: Royal Society of Chemistry journal article supplement (doi:10.1039/d2cc04408k), 2022-01-01
Supplement: d2cc04408k1.pdf [file d2cc04408k1.pdf]

## Supporting Information

# Direct Acylation and Alkynylation of Hydrocarbons via Synergistic Decatungstate Photo-HAT/Nickel Catalysis

Wenfeng Liu, Yang Ke, Chuhan Liu, Wangqing Kong\*

The Institute for Advanced Studies (IAS), Wuhan University, Wuhan, 430072 (P. R. China)

E-mail: wqkong@whu.edu.cn

# Contents

|                                      |     |
|--------------------------------------|-----|
| 1. General Information               | S3  |
| 2. General Procedures                | S4  |
| 3. Optimization Details              | S8  |
| 4. Mechanistic Studies               | S12 |
| 5. Characterization Data of Products | S13 |
| 6. Synthetic Applications            | S37 |
| 7. NMR Spectra                       | S41 |
| 8. References                        | S89 |

## 1. General Information

Nuclear magnetic resonance (NMR) spectroscopy measurements were carried out at room temperature.  $^1\text{H}$  NMR,  $^{13}\text{C}$  NMR,  $^{19}\text{F}$  NMR, HSQC and HMBC experiments were carried out using Bruker ADVANCE III (600 MHz) or JNM-ECZ400S/L1 (400 MHz) spectrometers. Chemical shifts ( $\delta$ ) are reported in ppm relative to the residual solvent peak with corresponding coupling constants ( $J$ ) in Hertz (Hz) and multiplicities (s: singlet, d: doublet, t: triplet, q: quartet, m: multiplet and combinations of these and app.: apparent multiplicities). Gas chromatography was determined with a SHIMADZU Nexis GC 2030 gas chromatography instrument with a FID detector. High-resolution mass spectra (HRMS) were recorded on Thermo Fisher Orbitrap Elite mass spectrometer. The photoreaction instrument (WPTEC-1020L) was purchased from WATTCAS, China.

### Materials and Methods:

Commercially available reagents and ligands were purchased from Sigma Aldrich, Alfa Aesar, and Strem Chemicals and unless otherwise stated were used without further purification.  $\text{NiBr}_2\cdot\text{DME}$ ,  $\text{NiI}_2$  and  $\text{Ni}(\text{OAc})_2$  were bought from Strem Chemicals. All reactions dealing with air- or moisture-sensitive compounds were performed in the argon-filled glove box or by standard Schlenk techniques in oven-dried reaction vessels under argon atmosphere. Solvents were purchased in HPLC quality, degassed by purging thoroughly with argon and dried over 4 Å activated molecular sieves. More sensitive compounds were stored in a desiccator or in a glove-box if required. Reactions were monitored by thin layer chromatography (TLC) using glass 0.25 mm silica gel plates. Compounds were visualized by UV-light at 254 nm and by dipping the plates in an aqueous potassium permanganate solution followed by heating. Flash column chromatography was performed over silica gel (200-400 mesh).

## 2. General Procedure

### 2.1 Synthesis of ketones via direct and selective acylation of hydrocarbons

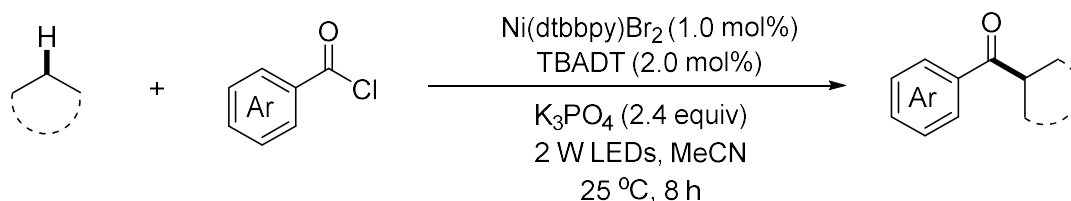

An oven-dried 10-mL vial equipped with a PTFE-coated stir bar was charged with  $\text{NiBr}_2 \cdot \text{dtbbpy}$  (0.002 mmol, 1.0 mol%), tetrabutylammonium decatungstate (0.004 mmol, 2.0 mol%), acyl chlorides (0.2 mmol, 1.0 equiv.), hydrocarbons (2.0 mmol, 10.0 equiv.), anhydrous  $\text{K}_3\text{PO}_4$  (0.48 mmol, 2.4 equiv.) and dry MeCN (1.0 mL) in an argon-filled glovebox. The vial was sealed and removed from the glovebox. The reaction mixture was stirred and irradiated using a 2 W 390 nm LED lamp (WATTCAS: WP-TEC-1020LC) at 25 °C for 8 hours. The resulting mixture was diluted with ethyl acetate and passed through a pad of celite. The celite plug was further washed with ethyl acetate. The solvent was removed under reduced pressure, and the residue was purified by column chromatography on silica gel, eluting with EtOAc/hexane to afford the corresponding ketone products.

### 2.2 Synthesis of amides via direct and selective acylation of hydrocarbons

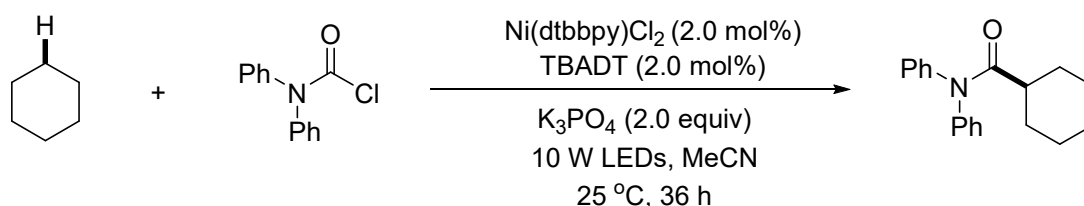

An oven-dried 10-mL vial equipped with a PTFE-coated stir bar was charged with  $\text{NiCl}_2 \cdot \text{dtbbpy}$  (0.004 mmol, 2.0 mol%), tetrabutylammonium decatungstate (0.004 mmol, 2.0 mol%), carbamic chloride (0.2 mmol, 1.0 equiv.), hydrocarbons (2.0 mmol, 10.0 equiv.), anhydrous  $\text{K}_3\text{PO}_4$  (0.4 mmol, 2.0 equiv.) and dry MeCN (1.0 mL) in an argon-filled glovebox. The vial was sealed and removed from the glovebox. The reaction mixture was stirred and irradiated using a 10 W 390 nm LED lamp (WATTCAS: WP-TEC-1020LC) at 25 °C for 36 hours. The resulting mixture was

diluted with ethyl acetate and passed through a pad of celite. The celite plug was further washed with ethyl acetate. The solvent was removed under reduced pressure, and the residue was purified by column chromatography on silica gel, eluting with EtOAc/hexane to afford the corresponding amide products.

### 2.3 Synthesis of esters via direct and selective acylation of hydrocarbons

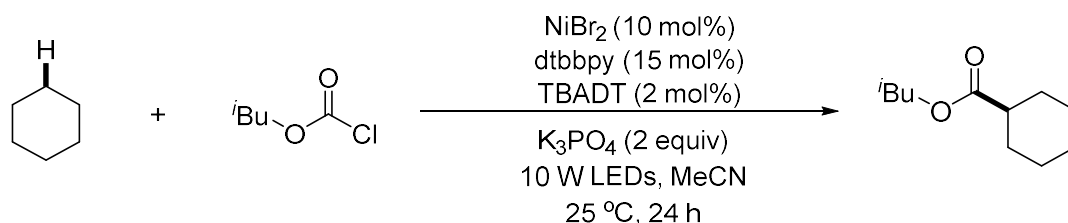

An oven-dried 10-mL vial equipped with a PTFE-coated stir bar was charged with  $\text{NiBr}_2$  (0.02 mmol, 10 mol%), dtbbpy (0.03 mmol, 15 mol%), tetrabutylammonium decatungstate (0.004 mmol, 2.0 mol%), chloroformates (0.2 mmol, 1.0 equiv.), hydrocarbons (2.0 mmol, 10.0 equiv.), anhydrous  $\text{K}_3\text{PO}_4$  (0.4 mmol, 2.0 equiv.) and dry MeCN (1.0 mL) in an argon-filled glovebox. The vial was sealed and removed from the glovebox. The reaction mixture was stirred and irradiated using a 10 W 390 nm LED lamp (WATTCAS: WP-TEC-1020LC) at  $25^\circ\text{C}$  for 24 hours. The resulting mixture was diluted with ethyl acetate and passed through a pad of celite. The celite plug was further washed with ethyl acetate. The solvent was removed under reduced pressure, and the residue was purified by column chromatography on silica gel, eluting with EtOAc/hexane to afford the corresponding ester products.

### 2.4 Synthesis of alkyl-substituted alkynes via direct and selective alkynylation of hydrocarbons

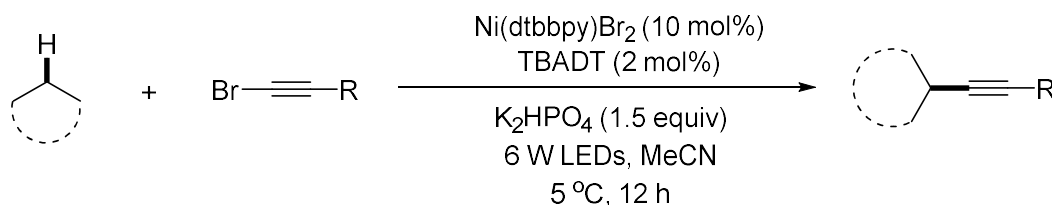

An oven-dried 10-mL vial equipped with a PTFE-coated stir bar was charged with  $\text{NiBr}_2\cdot\text{dtbbpy}$  (0.02 mmol, 10 mol%), tetrabutylammonium decatungstate (0.004

mmol, 2 mol%), alkynyl bromides (0.2 mmol, 1.0 equiv.), anhydrous  $K_2HPO_4$  (0.3 mmol, 1.5 equiv.), hydrocarbon (2.0 mmol, 10.0 equiv.) and dry MeCN (1.0 mL) in an argon-filled glovebox. The vial was sealed and removed from the glovebox. The reaction mixture was stirred and irradiated using a 6 W 390 nm LED lamp (WATTCAS: WP-TEC-1020LC) at 5 °C for 12 hours. The resulting mixture was diluted with ethyl acetate and passed through a pad of celite. The celite plug was further washed with ethyl acetate. Solvent was removed under reduced pressure, and the residue was purified by column chromatography on silica gel, eluting with EtOAc/hexane to afford the corresponding alkyne products.

## 2.5 Synthesis of alkyl-substituted alkynes via direct and selective alkylation of ethers

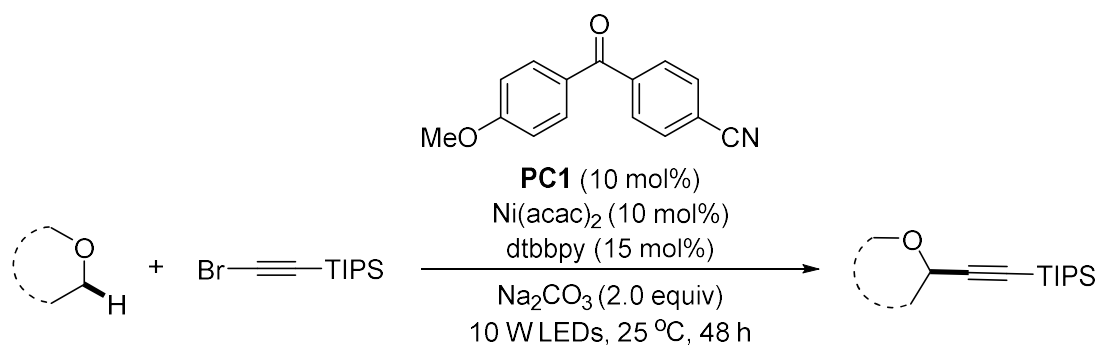

An oven-dried 10-mL vial equipped with a PTFE-coated stir bar was charged with  $Ni(acac)_2$  (0.02 mmol, 10 mol%),  $dtbbpy$  (0.03 mmol, 15 mol%), **PC1** (0.02 mmol, 10 mol%), alkynyl bromides (0.2 mmol, 1.0 equiv.), anhydrous  $Na_2CO_3$  (0.4 mmol, 2.0 equiv.) and ether (1.0 mL) as both C-H partners and solvent in an argon-filled glovebox. The vial was sealed and removed from the glovebox. The reaction mixture was stirred and irradiated using a 10 W 390 nm LED lamp (WATTCAS: WP-TEC-1020LC) at 25 °C for 48 hours. The resulting mixture was diluted with ethyl acetate and passed through a pad of celite. The celite plug was further washed with ethyl acetate. Solvent was removed under reduced pressure, and the residue was purified by column chromatography on silica gel, eluting with EtOAc/hexane to afford the corresponding alkyne products.

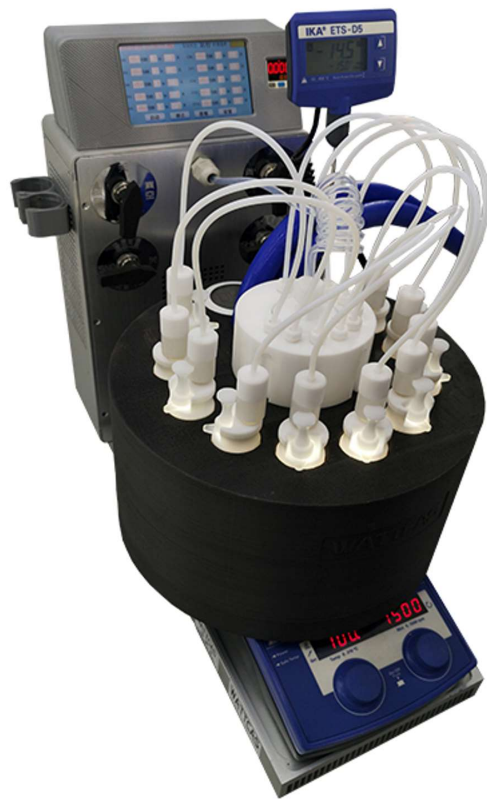

### 3. Optimization of Reaction Conditions

**Table S1: Optimization of the reaction conditions for C(sp<sup>3</sup>)-H alkylation of hydrocarbons.**

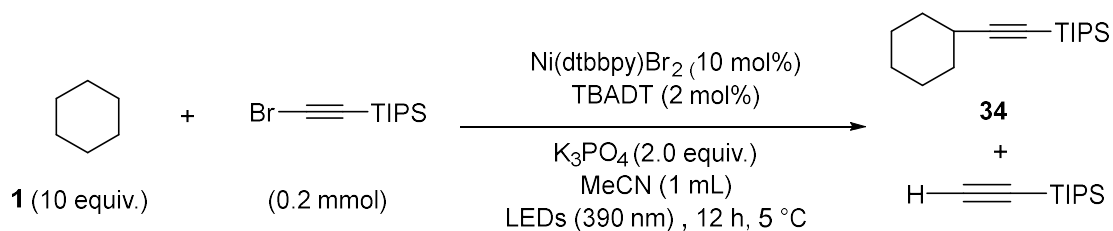

| entry | Power value of LED lamp (W) | yield of <b>34</b> (%) |
|-------|-----------------------------|------------------------|
| 1     | 10                          | 50                     |
| 2     | 8                           | 56                     |
| 3     | 6                           | 65                     |
| 4     | 4                           | 59                     |



**Table S2: optimization of the equivalents of Ni and TBADT, concentration for C(sp<sup>3</sup>)-H alkylation of hydrocarbons with alkynyl bromides**

| entry | X  | Y | Z   | yield of <b>34</b> (%) |
|-------|----|---|-----|------------------------|
| 1     | 10 | 2 | 0.5 | 60                     |
| 2     | 10 | 2 | 1.0 | 75                     |
| 3     | 5  | 2 | 0.5 | 45                     |
| 4     | 10 | 1 | 0.5 | 64                     |
| 5     | 10 | 2 | 2   | 62                     |

**Table S3: optimization of the base for C(sp<sup>3</sup>)-H alkylation of hydrocarbons with alkynyl bromides**

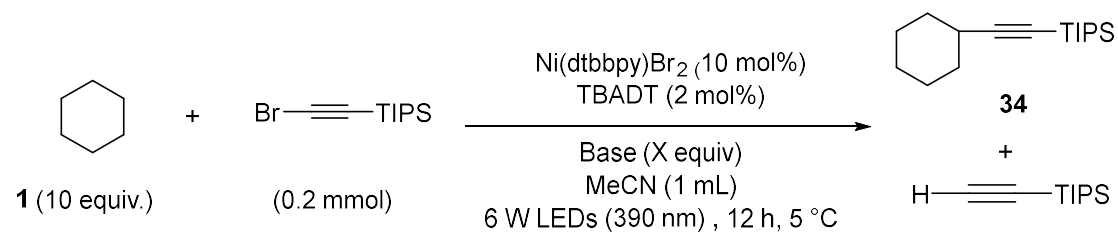

| entry | Base                                         | Eq. | yield of <b>34</b> (%) <sup>a</sup> |
|-------|----------------------------------------------|-----|-------------------------------------|
| 1     | K <sub>3</sub> PO <sub>4</sub>               | 2.0 | 75                                  |
| 2     | K <sub>2</sub> HPO <sub>4</sub>              | 2.0 | 86                                  |
| 3     | Na <sub>2</sub> CO <sub>3</sub>              | 2.0 | 72                                  |
| 4     | K <sub>2</sub> HPO <sub>4</sub>              | 1.5 | 96(76) <sup>b</sup>                 |
| 5     | K <sub>2</sub> HPO <sub>4</sub>              | 1.1 | 90                                  |
| 6     | K <sub>2</sub> HPO <sub>4</sub> <sup>c</sup> | 1.5 | 67(57) <sup>b</sup>                 |

<sup>a</sup>GC yield, <sup>b</sup>isolated yield, <sup>c</sup>This reaction was performed at 25 °C.

**Table S4: Optimization of the Reaction Conditions**

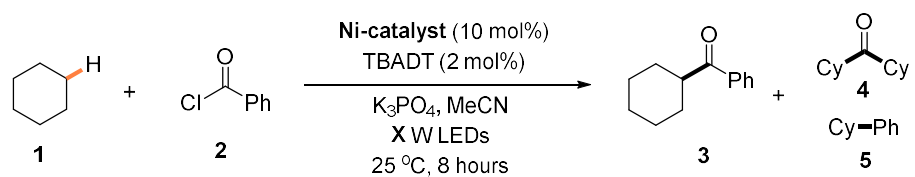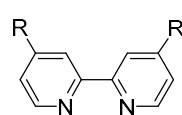

R = Me (**L1**)  
R = <sup>t</sup>Bu (**L2**)  
R = OMe (**L3**)

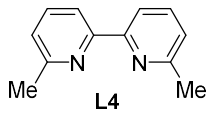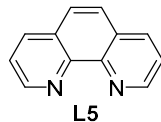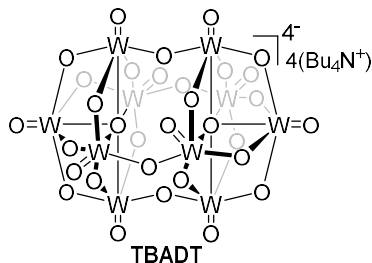

| entry             | nickel catalyst |                                       | Power value of LEDs (W) | yield of <b>3</b> (%) <sup>b</sup> | yield of <b>4</b> (%) <sup>b</sup> |
|-------------------|-----------------|---------------------------------------|-------------------------|------------------------------------|------------------------------------|
| 1                 | <b>L1</b>       | NiBr <sub>2</sub>                     | 10                      | 15                                 | -                                  |
| 2                 | <b>L2</b>       | NiBr <sub>2</sub>                     | 10                      | 45                                 | 8                                  |
| 3                 | <b>L3</b>       | NiBr <sub>2</sub>                     | 10                      | 10                                 | 13                                 |
| 4                 | <b>L4</b>       | NiBr <sub>2</sub>                     | 10                      | 42                                 | 10                                 |
| 5                 | <b>L5</b>       | NiBr <sub>2</sub>                     | 10                      | trace                              | -                                  |
| 6                 | <b>L2</b>       | NiCl <sub>2</sub>                     | 10                      | trace                              | -                                  |
| 7                 | <b>L2</b>       | NiI <sub>2</sub>                      | 10                      | 39                                 | 5                                  |
| 8                 | <b>L2</b>       | NiOAc <sub>2</sub> ·4H <sub>2</sub> O | 10                      | 44                                 | 15                                 |
| 9                 | <b>L2</b>       | NiBr <sub>2</sub> ·dme                | 10                      | 62                                 | 8                                  |
| 10                |                 | Ni( <b>L2</b> )Br <sub>2</sub>        | 10                      | 66                                 | 7                                  |
| 11                |                 | Ni( <b>L2</b> )Br <sub>2</sub>        | 6                       | 68                                 | 5                                  |
| 12                |                 | Ni( <b>L2</b> )Br <sub>2</sub>        | 2                       | 78                                 | < 2                                |
| 13 <sup>d</sup>   |                 | <b>Ni(L2)Br<sub>2</sub></b>           | <b>2</b>                | <b>83 (71)<sup>c</sup></b>         | <b>&lt; 2</b>                      |
| 14 <sup>d,e</sup> |                 | Ni( <b>L2</b> )Br <sub>2</sub>        | 2                       | 69                                 | 6                                  |
| 15 <sup>d</sup>   |                 | -                                     | 2                       | no reaction                        |                                    |
| 16 <sup>d,f</sup> |                 | Ni( <b>L2</b> )Br <sub>2</sub>        | 2                       | no reaction                        |                                    |
| 17 <sup>d,g</sup> |                 | Ni( <b>L2</b> )Br <sub>2</sub>        | 2                       | no reaction                        |                                    |

<sup>a</sup>Reaction conditions: **1** (2 mmol), **2** (0.2 mmol), [Ni]/L (10 mol%), TBADT (2 mol%),  $K_3PO_4$  (0.48 mmol) in MeCN (0.5 mL) at 25 °C under irradiation of LEDs (X W, 390 nm) for 8 hours. <sup>b</sup>Yields determined by GC analysis using adamantane as an internal standard. <sup>c</sup>Isolated yield. <sup>d</sup>1 mol% Ni(**L2**)Br<sub>2</sub> was used. <sup>e</sup>5 equivalents of cyclohexane were used. <sup>f</sup>Without TBADT. <sup>g</sup>Without light.

## 4. Mechanistic studies

### 4.1 UV-VIS absorption spectra

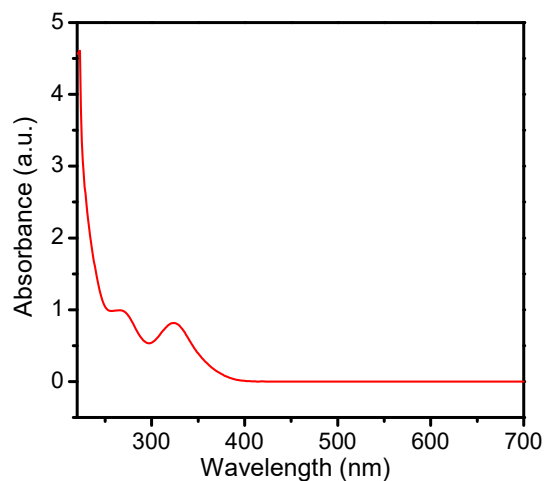

The UV-visible absorption spectra for TBADT in MeCN ( $10^{-4}$  M) is shown above.

### 4.2 Emission spectra

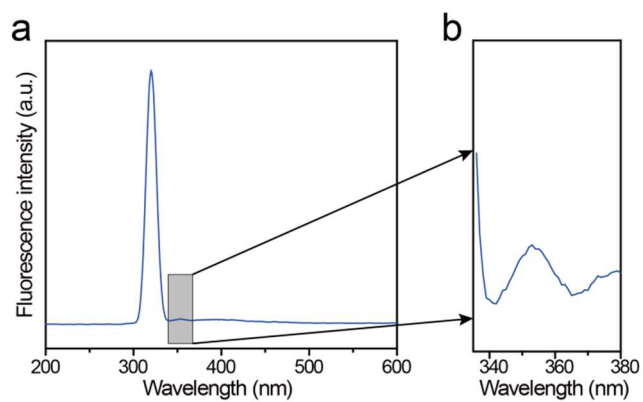

The emission spectra for TBADT irradiated under 320 nm light in MeCN ( $10^{-5}$  M) is shown above.

## 5. Characterization Data of Products

### Cyclohexyl(phenyl)methanone (**3**)

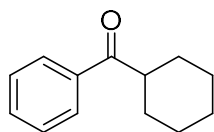

Chemical Formula: C<sub>13</sub>H<sub>16</sub>O

Exact Mass: 188.1201

**3** was prepared according to general procedure **2.1** using NiBr<sub>2</sub>•dtbbpy (0.002 mmol, 1.0 mg), tetrabutylammonium decatungstate (0.004 mmol, 14.0 mg), cyclohexane (2 mmol, 168.0 mg), anhydrous K<sub>3</sub>PO<sub>4</sub> (0.48 mmol, 101.8 mg) and benzoyl chloride (0.2 mmol, 28.1 mg) and was purified by silica gel column chromatography (PE/EtOAc = 40/1) to obtain **3** as colorless oil (28.9 mg, 71% yield).

The NMR data matched those reported in the literature.<sup>1</sup>

<sup>1</sup>H NMR (600 MHz, CDCl<sub>3</sub>) δ 7.97-7.91 (m, 2H), 7.56-7.52 (m, 1H), 7.48-7.42 (m, 2H), 3.26 (tt, *J* = 11.4, 3.3 Hz, 1H), 1.96-1.81 (m, 4H), 1.79-1.70 (m, 1H), 1.56-1.45 (m, 2H), 1.45-1.35 (m, 2H), 1.31-1.24 (m, 1H);

<sup>13</sup>C NMR (151 MHz, CDCl<sub>3</sub>) δ 204.0, 136.5, 132.8, 128.7, 128.4, 45.8, 29.5, 26.1, 26.0.

### Cyclohexyl(*p*-tolyl)methanone (**6**)

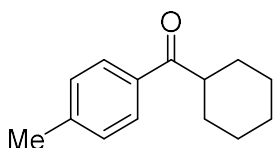

Chemical Formula: C<sub>14</sub>H<sub>18</sub>O

Exact Mass: 202.1358

**6** was prepared according to general procedure **2.1** using NiBr<sub>2</sub>•dtbbpy (0.002 mmol, 1.0 mg), tetrabutylammonium decatungstate (0.004 mmol, 14.0 mg), cyclohexane (2 mmol, 168.0 mg), anhydrous K<sub>3</sub>PO<sub>4</sub> (0.48 mmol, 101.8 mg) and 4-methylbenzoyl chloride (0.2 mmol, 30.9 mg) and was purified by silica gel column chromatography (PE/EtOAc = 40/1) to obtain **6** as colorless oil (32.2 mg, 73% yield).

The NMR data matched those reported in the literature.<sup>2</sup>

$^1\text{H}$  NMR (600 MHz,  $\text{CDCl}_3$ )  $\delta$  7.85 (d,  $J = 8.2$  Hz, 2H), 7.25 (d,  $J = 8.0$  Hz, 2H), 3.24 (tt,  $J = 11.6, 3.3$  Hz, 1H), 2.40 (s, 3H), 1.92-1.81 (m, 4H), 1.78-1.69 (m, 1H), 1.53-1.45 (m, 2H), 1.44-1.34 (m, 2H), 1.31-1.24 (m, 1H);

$^{13}\text{C}$  NMR (151 MHz,  $\text{CDCl}_3$ )  $\delta$  203.7, 143.6, 133.9, 129.4, 128.5, 45.6, 29.6, 26.1, 26.0, 21.7.

### Cyclohexyl(4-methoxyphenyl)methanone (7)

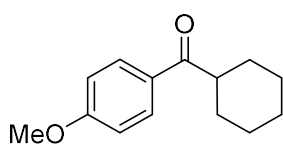

Chemical Formula:  $\text{C}_{14}\text{H}_{18}\text{O}_2$   
Exact Mass: 218.1307

**7** was prepared according to general procedure **2.1** using  $\text{NiBr}_2 \cdot \text{dtbbpy}$  (0.002 mmol, 1.0 mg), tetrabutylammonium decatungstate (0.004 mmol, 14.0 mg), cyclohexane (2 mmol, 168.0 mg), anhydrous  $\text{K}_3\text{PO}_4$  (0.48 mmol, 101.8 mg) and 4-methoxybenzoyl chloride (0.2 mmol, 34.1 mg) and was purified by silica gel column chromatography (PE/EtOAc = 20/1) to obtain **7** as colorless oil (28.8 mg, 66% yield).

The NMR data matched those reported in the literature.<sup>1</sup>

$^1\text{H}$  NMR (600 MHz,  $\text{CDCl}_3$ )  $\delta$  7.96-7.89 (m, 2H), 6.97-6.89 (m, 2H), 3.86 (s, 3H), 3.21 (tt,  $J = 11.6, 3.2$  Hz, 1H), 1.92-1.80 (m, 4H), 1.77-1.70 (m, 1H), 1.55-1.45 (m, 2H), 1.43-1.34 (m, 2H), 1.31-1.22 (m, 1H);

$^{13}\text{C}$  NMR (151 MHz,  $\text{CDCl}_3$ )  $\delta$  202.6, 163.3, 130.6, 129.4, 113.8, 55.6, 45.4, 29.7, 26.1, 26.1.

### Cyclohexyl(4-fluorophenyl)methanone (8)

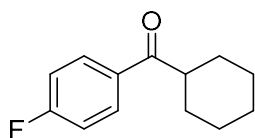

Chemical Formula:  $\text{C}_{13}\text{H}_{15}\text{FO}$   
Exact Mass: 206.1107

**8** was prepared according to general procedure **2.1** using  $\text{NiBr}_2 \cdot \text{dtbbpy}$  (0.002 mmol, 1.0 mg), tetrabutylammonium decatungstate (0.004 mmol, 14.0 mg), cyclohexane (2

mmol, 168.0 mg), anhydrous  $K_3PO_4$  (0.48 mmol, 101.8 mg) and 4-fluorobenzoyl chloride (0.2 mmol, 31.7 mg) and was purified by silica gel column chromatography (PE/EtOAc = 40/1) to obtain **8** as colorless oil (29.7 mg, 72% yield).

The NMR data matched those reported in the literature.<sup>1</sup>

$^1H$  NMR (600 MHz,  $CDCl_3$ )  $\delta$  8.00-7.94 (m, 2H), 7.15-7.08 (m, 2H), 3.21 (tt,  $J = 11.6, 3.2$  Hz, 1H), 1.90-1.81 (m, 4H), 1.76-1.71 (m, 1H), 1.53-1.44 (m, 2H), 1.43-1.34 (m, 2H), 1.29-1.24 (m, 1H);

$^{19}F$  NMR (565 MHz,  $CDCl_3$ )  $\delta$  -106.00 (m);

$^{13}C$  NMR (151 MHz,  $CDCl_3$ )  $\delta$  202.3, 165.6 (d,  $J = 254.0$  Hz), 132.7 (d,  $J = 2.9$  Hz), 130.9 (d,  $J = 9.2$  Hz), 115.7 (d,  $J = 21.8$  Hz), 45.6, 29.4, 25.9, 25.8.

### Cyclohexyl(3-methoxyphenyl)methanone (**9**)

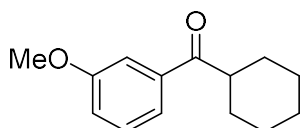

Chemical Formula:  $C_{14}H_{18}O_2$

Exact Mass: 218.1307

**9** was prepared according to general procedure **2.1** using  $NiBr_2 \cdot dtbbpy$  (0.002 mmol, 1.0 mg), tetrabutylammonium decatungstate (0.004 mmol, 14.0 mg), cyclohexane (2 mmol, 168.0 mg), anhydrous  $K_3PO_4$  (0.48 mmol, 101.8 mg) and 3-methoxybenzoyl chloride (0.2 mmol, 34.1 mg) and was purified by silica gel column chromatography (PE/EtOAc = 40/1) to obtain **9** as colorless oil (27.9 mg, 64% yield).

The NMR data matched those reported in the literature.<sup>1</sup>

$^1H$  NMR (600 MHz,  $CDCl_3$ )  $\delta$  7.54-7.50 (m, 1H), 7.49-7.44 (m, 1H), 7.36 (t,  $J = 7.9$  Hz, 1H), 7.11-7.07 (m, 1H), 3.85 (s, 3H), 3.23 (tt,  $J = 11.5, 3.3$  Hz, 1H), 1.90-1.82 (m, 4H), 1.76-1.72 (m, 1H), 1.53-1.45 (m, 2H), 1.43-1.35 (m, 2H), 1.29-1.24 (m, 1H);

$^{13}C$  NMR (151 MHz,  $CDCl_3$ )  $\delta$  203.8, 159.9, 137.8, 129.5, 120.8, 119.0, 112.8, 55.4, 45.8, 29.5, 26.0, 25.9.

### Cyclohexyl(3,5-dimethylphenyl)methanone (**10**)

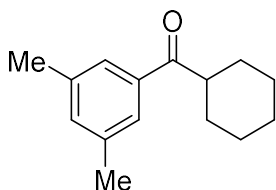

Chemical Formula: C<sub>15</sub>H<sub>20</sub>O

Exact Mass: 216.1514

**10** was prepared according to general procedure **2.1** using NiBr<sub>2</sub>•dtbbpy (0.002 mmol, 1.0 mg), tetrabutylammonium decatungstate (0.004 mmol, 14.0 mg), cyclohexane (2 mmol, 168.0 mg), anhydrous K<sub>3</sub>PO<sub>4</sub> (0.48 mmol, 101.8 mg) and 3,5-dimethylbenzoyl chloride (0.2 mmol, 33.7 mg) and was purified by silica gel column chromatography (PE/EtOAc = 40/1) to obtain **10** as colorless oil (27.2 mg, 66% yield).

<sup>1</sup>H NMR (600 MHz, CDCl<sub>3</sub>) δ 7.53 (s, 2H), 7.18 (s, 1H), 3.24 (tt, *J* = 11.5, 3.3 Hz, 1H), 2.37 (s, 6H), 1.90-1.81 (m, 4H), 1.77-1.70 (m, 1H), 1.53-1.44 (m, 2H), 1.44-1.35 (m, 2H), 1.31-1.23 (m, 1H);

<sup>13</sup>C NMR (151 MHz, CDCl<sub>3</sub>) δ 204.3, 138.1, 136.5, 134.3, 125.9, 45.6, 29.4, 25.9, 25.8, 21.2;

HRMS: (ESI) calcd for C<sub>15</sub>H<sub>21</sub>O<sup>+</sup>[M+H]<sup>+</sup> 217.1587; found 217.1583.

### Cyclohexyl(2-fluorophenyl)methanone (**11**)

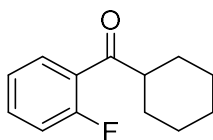

Chemical Formula: C<sub>13</sub>H<sub>15</sub>FO

Exact Mass: 206.1107

**11** was prepared according to general procedure **2.1** using NiBr<sub>2</sub>•dtbbpy (0.002 mmol, 1.0 mg), tetrabutylammonium decatungstate (0.004 mmol, 14.0 mg), cyclohexane (2 mmol, 168.0 mg), anhydrous K<sub>3</sub>PO<sub>4</sub> (0.48 mmol, 101.8 mg) and 2-fluorobenzoyl chloride (0.2 mmol, 31.7 mg) and was purified by silica gel column chromatography (PE/EtOAc = 100/1) to obtain **11** as colorless oil (12.8 mg, 31% yield).

The NMR data matched those reported in the literature.<sup>3</sup>



$^1\text{H}$  NMR (600 MHz,  $\text{CDCl}_3$ )  $\delta$  7.76-7.70 (m, 1H), 7.51-7.44 (m, 1H), 7.24-7.19 (m, 1H), 7.14-7.08 (m, 1H), 3.15-3.08 (m, 1H), 1.97-1.91 (m, 2H), 1.84-1.78 (m, 2H), 1.73-1.68 (m, 1H), 1.45-1.34 (m, 4H), 1.27-1.23 (m, 1H);

$^{19}\text{F}$  NMR (565 MHz,  $\text{CDCl}_3$ )  $\delta$  -111.69 (m);

$^{13}\text{C}$  NMR (151 MHz,  $\text{CDCl}_3$ )  $\delta$  202.9 (d,  $J = 4.2$  Hz), 161.1 (d,  $J = 253.1$  Hz), 133.8 (d,  $J = 8.8$  Hz), 130.8 (d,  $J = 2.9$  Hz), 126.1 (d,  $J = 13.6$  Hz), 124.4 (d,  $J = 3.6$  Hz), 116.4 (d,  $J = 23.8$  Hz), 50.1 (d,  $J = 6.1$  Hz), 28.8, 26.0, 25.8.

### Cyclohexyl(furan-2-yl)methanone (**12**)

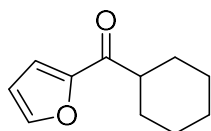

Chemical Formula:  $\text{C}_{11}\text{H}_{14}\text{O}_2$

Exact Mass: 178.0994

**12** was prepared according to general procedure **2.1** using  $\text{NiBr}_2 \cdot \text{dtbbpy}$  (0.002 mmol, 1.0 mg), tetrabutylammonium decatungstate (0.004 mmol, 14.0 mg), cyclohexane (2 mmol, 168.0 mg), anhydrous  $\text{K}_3\text{PO}_4$  (0.48 mmol, 101.8 mg) and furan-2-carbonyl chloride (0.2 mmol, 26.1 mg) and was purified by silica gel column chromatography (PE/EtOAc = 40/1) to obtain **12** as colorless oil (15.3 mg, 43% yield).

The NMR data matched those reported in the literature.<sup>4</sup>

$^1\text{H}$  NMR (600 MHz,  $\text{CDCl}_3$ )  $\delta$  7.60-7.55 (m, 1H), 7.18 (dd,  $J = 3.5, 0.8$  Hz, 1H), 6.52 (dd,  $J = 3.5, 1.7$  Hz, 1H), 3.06 (tt,  $J = 11.7, 3.3$  Hz, 1H), 1.91-1.80 (m, 4H), 1.75-1.69 (m, 1H), 1.55-1.46 (m, 2H), 1.40-1.32 (m, 2H), 1.30-1.25 (m, 1H);

$^{13}\text{C}$  NMR (151 MHz,  $\text{CDCl}_3$ )  $\delta$  193.0, 152.3, 146.1, 117.0, 112.1, 46.3, 28.9, 25.8, 25.7.

### (4-chlorophenyl)(cyclohexyl)methanone (**13**)

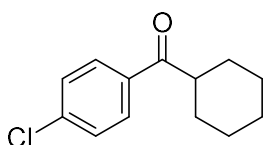

Chemical Formula: C<sub>13</sub>H<sub>15</sub>ClO

Exact Mass: 222.0811

**13** was prepared according to general procedure **2.1** using NiBr<sub>2</sub>•dtbbpy (0.002 mmol, 1.0 mg), tetrabutylammonium decatungstate (0.004 mmol, 14.0 mg), cyclohexane (2 mmol, 168.0 mg), anhydrous K<sub>3</sub>PO<sub>4</sub> (0.48 mmol, 101.8 mg) and 4-chlorobenzoyl chloride (0.2 mmol, 35.0 mg) and was purified by silica gel column chromatography (PE/EtOAc = 100/1) to obtain **13** as colorless oil (29.8 mg, 67% yield).

The NMR data matched those reported in the literature.<sup>5</sup>

<sup>1</sup>H NMR (600 MHz, CDCl<sub>3</sub>) δ 8.00-7.78 (m, 2H), 7.53-7.35 (m, 2H), 3.20 (tt, *J* = 11.5, 3.2 Hz, 1H), 1.94-1.80 (m, 4H), 1.80-1.71 (m, 1H), 1.54-1.42 (m, 2H), 1.42 -1.32 (m, 2H), 1.31-1.21 (m, 1H);

<sup>13</sup>C NMR (151 MHz, CDCl<sub>3</sub>) δ 202.6, 139.1, 134.6, 129.7, 128.9, 45.6, 29.3, 25.9, 25.8.

#### cyclohexyl(4-(trifluoromethyl)phenyl)methanone (**14**)

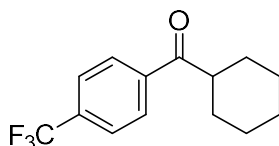

Chemical Formula: C<sub>14</sub>H<sub>15</sub>F<sub>3</sub>O

Exact Mass: 256.1075

**14** was prepared according to general procedure **2.1** using NiBr<sub>2</sub>•dtbbpy (0.002 mmol, 1.0 mg), tetrabutylammonium decatungstate (0.004 mmol, 14.0 mg), cyclohexane (2 mmol, 168.0 mg), anhydrous K<sub>3</sub>PO<sub>4</sub> (0.48 mmol, 101.8 mg) and 4-(trifluoromethyl)benzoyl chloride (0.2 mmol, 41.7 mg) and was purified by silica gel column chromatography (PE/EtOAc = 100/1) to obtain **14** as colorless oil (17.9 mg, 35% yield).

The NMR data matched those reported in the literature.<sup>1</sup>

$^1\text{H}$  NMR (600 MHz,  $\text{CDCl}_3$ )  $\delta$  8.06-7.99 (m, 2H), 7.76-7.69 (m, 2H), 3.24 (tt,  $J = 11.4$ , 3.3 Hz, 1H), 1.92-1.83 (m, 4H), 1.78-1.72 (m, 1H), 1.55-1.44 (m, 2H), 1.44-1.35 (m, 2H), 1.30-1.25 (m, 1H);

$^{19}\text{F}$  NMR (565 MHz,  $\text{CDCl}_3$ )  $\delta$  -63.08(s);

$^{13}\text{C}$  NMR (151 MHz,  $\text{CDCl}_3$ )  $\delta$  202.9, 139.1, 134.0 (q,  $J = 32.7$  Hz), 128.5, 125.6 (q,  $J = 3.7$  Hz), 123.6 (q,  $J = 272.6$  Hz), 45.9, 29.2, 25.8, 25.7.

### Cyclooctyl(*p*-tolyl)methanone (15)

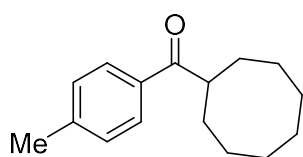

Chemical Formula:  $\text{C}_{16}\text{H}_{22}\text{O}$

Exact Mass: 230.1671

**15** was prepared according to general procedure **2.1** using  $\text{NiBr}_2 \cdot \text{dtbbpy}$  (0.002 mmol, 1.0 mg), tetrabutylammonium decatungstate (0.004 mmol, 14.0 mg), cyclooctane (2 mmol, 224.0 mg), anhydrous  $\text{K}_3\text{PO}_4$  (0.48 mmol, 101.8 mg) and 4-methylbenzoyl chloride (0.2 mmol, 30.9 mg) and was purified by silica gel column chromatography (PE/EtOAc = 40/1) to obtain **15** as colorless oil (33.0 mg, 69% yield).

$^1\text{H}$  NMR (600 MHz,  $\text{CDCl}_3$ )  $\delta$  7.84 (d,  $J = 8.2$  Hz, 2H), 7.25 (d,  $J = 7.9$  Hz, 2H), 3.46 (tt,  $J = 8.8$ , 3.5 Hz, 1H), 2.41 (s, 3H), 1.88-1.81 (m, 2H), 1.80-1.70 (m, 4H), 1.69-1.63 (m, 3H), 1.63-1.53 (m, 5H);

$^{13}\text{C}$  NMR (151 MHz,  $\text{CDCl}_3$ )  $\delta$  204.2, 143.4, 133.9, 129.3, 128.4, 44.8, 29.1, 26.7, 26.6, 25.6, 21.6;

HRMS: (ESI) calcd for  $\text{C}_{16}\text{H}_{23}\text{O}^+[\text{M}+\text{H}]^+$  217.1743; found 217.1736.

### Cyclopentyl(*p*-tolyl)methanone (16)

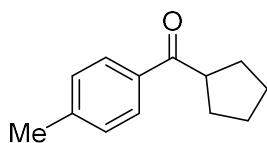

Chemical Formula:  $\text{C}_{13}\text{H}_{16}\text{O}$

Exact Mass: 188.1201

**16** was prepared according to general procedure **2.1** using NiBr<sub>2</sub>•dtbbpy (0.002 mmol, 1.0 mg), tetrabutylammonium decatungstate (0.004 mmol, 14.0 mg), cyclopentane (2 mmol, 140.0 mg), anhydrous K<sub>3</sub>PO<sub>4</sub> (0.48 mmol, 101.8 mg) and 4-methylbenzoyl chloride (0.2 mmol, 30.9 mg) and was purified by silica gel column chromatography (PE/EtOAc = 40/1) to obtain **16** as colorless oil (20.7 mg, 66% yield).

The NMR data matched those reported in the literature.<sup>6</sup>

<sup>1</sup>H NMR (600 MHz, CDCl<sub>3</sub>) δ 7.88 (d, *J* = 8.2 Hz, 2H), 7.25 (d, *J* = 7.9 Hz, 2H), 3.74-3.65 (m, 1H), 2.41 (s, 3H), 1.96-1.85 (m, 4H), 1.77-1.69 (m, 2H), 1.69-1.61 (m, 2H);

<sup>13</sup>C NMR (151 MHz, CDCl<sub>3</sub>) δ 202.5, 143.4, 134.5, 129.2, 128.6, 46.3, 30.1, 26.4, 21.6.

#### **((1*S*,4*R*)-Bicyclo[2.2.1]heptan-2-yl)(*p*-tolyl)methanone (17)**

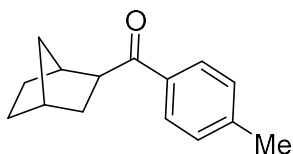

Chemical Formula: C<sub>15</sub>H<sub>18</sub>O

Exact Mass: 214.1358

**17** was prepared according to general procedure **2.1** using NiBr<sub>2</sub>•dtbbpy (0.002 mmol, 1.0 mg), tetrabutylammonium decatungstate (0.004 mmol, 14.0 mg), (*1s,4s*)-bicyclo[2.2.1]heptane (2 mmol, 192.4 mg), anhydrous K<sub>3</sub>PO<sub>4</sub> (0.48 mmol, 101.8 mg) and 4-methylbenzoyl chloride (0.2 mmol, 30.9 mg) and was purified by silica gel column chromatography (PE/EtOAc = 40/1) to obtain **17** as colorless oil (26.6 mg, 60% yield).

<sup>1</sup>H NMR (600 MHz, CDCl<sub>3</sub>) δ 7.86 (d, *J* = 8.2 Hz, 2H), 7.26-7.22 (m, 2H), 3.19 (dd, *J* = 8.9, 5.5 Hz, 1H), 2.52-2.48 (m, 1H), 2.40 (s, 3H), 2.34 (s, 1H), 2.03-1.97 (m, 1H), 1.65-1.55 (m, 2H), 1.50-1.44 (m, 1H), 1.44-1.39 (m, 2H), 1.33-1.27 (m, 1H), 1.17-1.11 (m, 1H);

<sup>13</sup>C NMR (151 MHz, CDCl<sub>3</sub>) δ 201.2, 143.4, 134.2, 129.3, 128.7, 49.5, 41.2, 36.4, 36.3, 33.8, 29.9, 29.2, 21.7;

HRMS: (ESI) calcd for  $C_{15}H_{19}O^+[M+H]^+$  215.1430; found 215.1428.

### 2-phenyl-1-(*p*-tolyl)ethan-1-one (**18**)

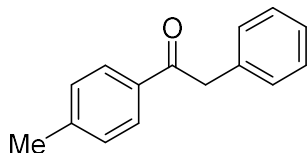

Chemical Formula:  $C_{15}H_{14}O$   
Exact Mass: 210.1045

**18** was prepared according to general procedure **2.1** using  $NiBr_2 \cdot dtbbpy$  (0.002 mmol, 1.0 mg), tetrabutylammonium decatungstate (0.004 mmol, 14.0 mg), toluene (2.0 mmol, 184.3 mg), anhydrous  $K_3PO_4$  (0.48 mmol, 101.8 mg) and 4-methylbenzoyl chloride (0.2 mmol, 30.9 mg) and was purified by silica gel column chromatography (PE/EtOAc = 40/1) to obtain **18** as colorless oil (15.0 mg, 35% yield).

The NMR data matched those reported in the literature.<sup>7</sup>

$^1H$  NMR (600 MHz,  $CDCl_3$ )  $\delta$  7.95-7.88 (m, 2H), 7.36-7.29 (m, 2H), 7.29-7.23 (m, 5H), 4.26 (s, 2H), 2.40 (s, 3H);

$^{13}C$  NMR (151 MHz,  $CDCl_3$ )  $\delta$  197.4, 144.1, 134.9, 134.2, 129.6, 129.5, 128.9, 128.8, 126.9, 45.6, 21.8.

### (tetrahydrofuran-2-yl)(*p*-tolyl)methanone (**19**)

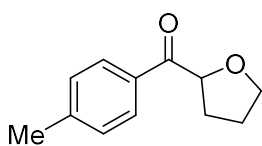

Chemical Formula:  $C_{12}H_{14}O_2$   
Exact Mass: 190.0994

**19** was prepared according to general procedure **2.1** using  $NiBr_2 \cdot dtbbpy$  (0.002 mmol, 1.0 mg), tetrabutylammonium decatungstate (0.004 mmol, 14.0 mg), tetrahydrofuran (2 mmol, 144.2 mg), anhydrous  $K_3PO_4$  (0.48 mmol, 101.8 mg) and 4-methylbenzoyl chloride (0.2 mmol, 30.9 mg) and was purified by silica gel column chromatography (PE/EtOAc = 20/1) to obtain **19** as colorless oil (22.3 mg, 57% yield).

The NMR data matched those reported in the literature.<sup>8</sup>

$^1\text{H}$  NMR (600 MHz,  $\text{CDCl}_3$ )  $\delta$  7.89 (d,  $J = 8.2$  Hz, 2H), 7.27-7.25 (m, 2H), 5.24 (dd,  $J = 8.5, 5.8$  Hz, 1H), 4.04 (dt,  $J = 8.3, 6.8$  Hz, 1H), 3.97 (dt,  $J = 8.2, 6.7$  Hz, 1H), 2.41 (s, 3H), 2.32-2.24 (m, 1H), 2.16-2.07 (m, 1H), 2.00-1.93 (m, 2H);

$^{13}\text{C}$  NMR (151 MHz,  $\text{CDCl}_3$ )  $\delta$  198.5, 144.3, 132.7, 129.4, 129.0, 80.0, 69.5, 29.5, 25.8, 21.8.

#### (1,4-dioxan-2-yl)(*p*-tolyl)methanone (**20**)

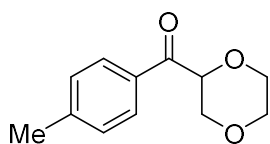

Chemical Formula:  $\text{C}_{12}\text{H}_{14}\text{O}_3$   
Exact Mass: 206.0943

**20** was prepared according to general procedure **2.1** using  $\text{NiBr}_2 \cdot \text{dtbbpy}$  (0.002 mmol, 1.0 mg), tetrabutylammonium decatungstate (0.004 mmol, 14.0 mg), 1,4-dioxane (2 mmol, 176.2 mg), anhydrous  $\text{K}_3\text{PO}_4$  (0.48 mmol, 101.8 mg) and 4-methylbenzoyl chloride (0.2 mmol, 30.9 mg) and was purified by silica gel column chromatography (PE/EtOAc = 10/1) to obtain **20** as colorless oil (26.6 mg, 61% yield).

$^1\text{H}$  NMR (600 MHz,  $\text{CDCl}_3$ )  $\delta$  7.89 (d,  $J = 8.3$  Hz, 2H), 7.29-7.25 (m, 2H), 4.97 (dd,  $J = 9.5, 2.9$  Hz, 1H), 4.08 (dd,  $J = 11.8, 2.9$  Hz, 1H), 4.00-3.95 (m, 1H), 3.92-3.86 (m, 1H), 3.81-3.76 (m, 1H), 3.74-3.67 (m, 2H), 2.42 (s, 3H);

$^{13}\text{C}$  NMR (151 MHz,  $\text{CDCl}_3$ )  $\delta$  195.5, 144.8, 132.4, 129.5, 129.0, 77.6, 68.4, 66.9, 66.5, 21.9.

HRMS: (ESI) calcd for  $\text{C}_{12}\text{H}_{15}\text{O}_3^+[\text{M}+\text{H}]^+$  207.1016; found 207.1014.

#### (4-bromotetrahydro-2H-pyran-2-yl)(*p*-tolyl)methanone (**21**)

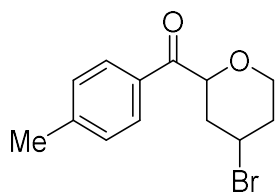

Chemical Formula:  $\text{C}_{13}\text{H}_{15}\text{BrO}_2$   
Exact Mass: 282.0255

**21** was prepared according to general procedure **2.1** using NiBr<sub>2</sub>•dtbbpy (0.002 mmol, 1.0 mg), tetrabutylammonium decatungstate (0.004 mmol, 14.0 mg), 4-bromotetrahydro-2*H*-pyran (2.0 mmol, 330.1 mg), anhydrous K<sub>3</sub>PO<sub>4</sub> (0.48 mmol, 101.8 mg) and 4-methylbenzoyl chloride (0.2 mmol, 30.9 mg) and was purified by silica gel column chromatography (PE/EtOAc = 20/1) to obtain **21** as colorless oil (30.6 mg, 54% yield).

<sup>1</sup>H NMR (600 MHz, CDCl<sub>3</sub>) δ 7.88 (d, *J* = 8.3 Hz, 2H), 7.29-7.25 (m, 2H), 5.29 (dd, *J* = 10.1, 2.6 Hz, 1H), 4.83-4.77 (m, 1H), 4.16-4.09 (m, 1H), 4.05-3.99 (m, 1H), 2.41 (s, 3H), 2.35-2.28 (m, 1H), 2.26-2.17 (m, 2H), 2.01-1.95 (m, 1H);

<sup>13</sup>C NMR (151 MHz, CDCl<sub>3</sub>) δ 197.0, 144.7, 132.1, 129.5, 129.1, 74.6, 63.7, 49.3, 37.1, 34.2, 21.9;

HRMS: (ESI) calcd for C<sub>13</sub>H<sub>16</sub>BrO<sub>2</sub><sup>+</sup>[M+H]<sup>+</sup> 283.0823; found 283.0325.

### 2-(*tert*-butoxy)-1-(*p*-tolyl)ethan-1-one (**22**)

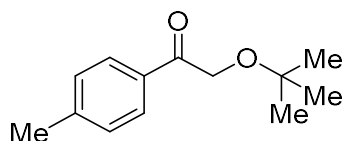

Chemical Formula: C<sub>13</sub>H<sub>18</sub>O<sub>2</sub>  
Exact Mass: 206.1307

**22** was prepared according to general procedure **2.1** using NiBr<sub>2</sub>•dtbbpy (0.002 mmol, 1.0 mg), tetrabutylammonium decatungstate (0.004 mmol, 14.0 mg), 2-methoxy-2-methylpropane (2.0 mmol, 176.4 mg), anhydrous K<sub>3</sub>PO<sub>4</sub> (0.48 mmol, 101.8 mg) and 4-methylbenzoyl chloride (0.2 mmol, 30.9 mg) and was purified by silica gel column chromatography (PE/EtOAc = 20/1) to obtain **22** as colorless oil (26.4 mg, 64% yield).

The NMR data matched those reported in the literature.<sup>9</sup>

<sup>1</sup>H NMR (600 MHz, CDCl<sub>3</sub>) δ 7.87 (d, *J* = 8.2 Hz, 2H), 7.26-7.23 (m, 2H), 4.63 (s, 2H), 2.40 (s, 3H), 1.27 (s, 9H);

<sup>13</sup>C NMR (151 MHz, CDCl<sub>3</sub>) δ 196.9, 144.1, 133.0, 129.3, 128.4, 74.6, 66.3, 27.6, 21.8.

### 2-ethoxy-1-(*p*-tolyl)propan-1-one (**23**)

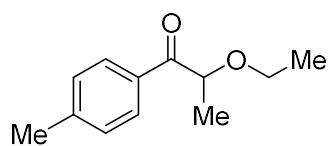

Chemical Formula: C<sub>12</sub>H<sub>16</sub>O<sub>2</sub>  
Exact Mass: 192.1150

**23** was prepared according to general procedure **2.1** using NiBr<sub>2</sub>•dtbbpy (0.002 mmol, 1.0 mg), tetrabutylammonium decatungstate (0.004 mmol, 14.0 mg), ethoxyethane (2.0 mmol, 148.2 mg), anhydrous K<sub>3</sub>PO<sub>4</sub> (0.48 mmol, 101.8 mg) and 4-methylbenzoyl chloride (0.2 mmol, 30.9 mg) and was purified by silica gel column chromatography (PE/EtOAc = 20/1) to obtain **23** as colorless oil (9.6 mg, 27% yield).

The NMR data matched those reported in the literature.<sup>10</sup>

<sup>1</sup>H NMR (600 MHz, CDCl<sub>3</sub>) δ 7.99 (d, *J* = 8.2 Hz, 2H), 7.27-7.25 (m, 2H), 4.65 (q, *J* = 6.9 Hz, 1H), 3.54 (dq, *J* = 9.1, 7.0 Hz, 1H), 3.47 (dq, *J* = 9.0, 7.0 Hz, 1H), 2.41 (s, 3H), 1.48 (d, *J* = 6.9 Hz, 3H), 1.21 (t, *J* = 7.0 Hz, 3H);

<sup>13</sup>C NMR (151 MHz, CDCl<sub>3</sub>) δ 200.9, 144.3, 132.4, 129.4, 129.1, 79.3, 65.3, 21.8, 19.2, 15.5.

### Tert-butyl 2-(4-methylbenzoyl)pyrrolidine-1-carboxylate (**24**)

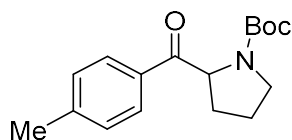

Chemical Formula: C<sub>17</sub>H<sub>23</sub>NO<sub>3</sub>  
Exact Mass: 289.1678

**24** was prepared according to general procedure **2.1** using NiBr<sub>2</sub>•dtbbpy (0.002 mmol, 1.0 mg), tetrabutylammonium decatungstate (0.004 mmol, 14.0 mg), tert-butyl pyrrolidine-1-carboxylate (1.0 mmol, 171.2 mg), anhydrous K<sub>3</sub>PO<sub>4</sub> (0.48 mmol, 101.8 mg) and 4-methylbenzoyl chloride (0.2 mmol, 30.9 mg) and was purified by silica gel column chromatography (PE/EtOAc = 10/1) to obtain **24** as colorless oil (26.5 mg, 45% yield); a 3:2 mixture of rotamers.

The NMR data matched those reported in the literature.<sup>11</sup>



$^1\text{H}$  NMR (600 MHz,  $\text{CDCl}_3$ )  $\delta$  7.91-7.82 (m, 2H), 7.29-7.22 (m, 2H), 5.31 (dd,  $J = 9.3$ , 3.1 Hz, 0.4H), 5.17 (dd,  $J = 8.9$ , 3.9 Hz, 0.6H), 3.70-3.64 (m, 0.6H), 3.64-3.58 (m, 0.4H), 3.56-3.51 (m, 0.6H), 3.49-3.43 (m, 0.4H), 2.41 (s, 1.8H), 2.39 (s, 1.2H), 2.35-2.23 (m, 1H), 1.97-1.85 (m, 3H), 1.46 (s, 3.6H), 1.25 (s, 5.4H);

$^{13}\text{C}$  NMR (151 MHz,  $\text{CDCl}_3$ )  $\delta$  198.5, 198.0, 154.5, 153.9, 144.0, 144.0, 132.7, 132.5, 129.4, 129.3, 128.7, 128.3, 79.7, 79.6, 61.3, 61.0, 46.8, 46.6, 31.0, 29.9, 28.5, 28.2, 24.2, 23.6, 21.7.

### Tert-butyl methyl(2-oxo-2-(*p*-tolyl)ethyl)carbamate (**25**)

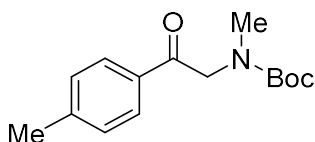

Chemical Formula:  $\text{C}_{15}\text{H}_{21}\text{NO}_3$   
Exact Mass: 263.1521

**25** was prepared according to general procedure **2.1** using  $\text{NiBr}_2 \cdot \text{dtbbpy}$  (0.002 mmol, 1.0 mg), tetrabutylammonium decatungstate (0.004 mmol, 14.0 mg), tert-butyl dimethylcarbamate (1.0 mmol, 145.2 mg), anhydrous  $\text{K}_3\text{PO}_4$  (0.48 mmol, 101.8 mg) and 4-methylbenzoyl chloride (0.2 mmol, 30.9 mg) and was purified by silica gel column chromatography (PE/EtOAc = 10/1) to obtain **25** as colorless oil (35.8 mg, 69% yield); a 1.2:1 mixture of rotamers.

$^1\text{H}$  NMR (600 MHz,  $\text{CDCl}_3$ )  $\delta$  7.86-7.80 (m, 2H), 7.29-7.22 (m, 2H), 4.65 (s, 1.1H), 4.55 (s, 0.9H), 2.96 (s, 1.35H), 2.92 (s, 1.65H), 2.41 (s, 1.35H), 2.40 (s, 1.65H), 1.48 (s, 5H), 1.37 (s, 4H);

$^{13}\text{C}$  NMR (151 MHz,  $\text{CDCl}_3$ )  $\delta$  194.9, 194.5, 156.4, 155.9, 144.5, 144.4, 132.91, 132.88, 129.6, 129.5, 128.1, 127.9, 80.1, 80.0, 55.7, 55.1, 35.8, 35.7, 28.5, 28.3, 21.8.

HRMS: (ESI) calcd for  $\text{C}_{15}\text{H}_{22}\text{NO}_3^+[\text{M}+\text{H}]^+$  264.1594; found 264.1601.

### N-methyl-N-(2-oxo-2-phenylethyl)acetamide (**26**)

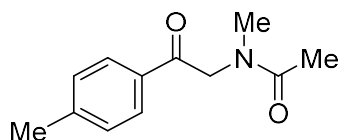

Chemical Formula: C<sub>12</sub>H<sub>15</sub>NO<sub>2</sub>

Exact Mass: 205.1103

**26** was prepared according to general procedure **2.1** using NiBr<sub>2</sub>•dtbbpy (0.002 mmol, 1.0 mg), tetrabutylammonium decatungstate (0.004 mmol, 14.0 mg), N,N-dimethylacetamide (2.0 mmol, 174.2 mg), anhydrous K<sub>3</sub>PO<sub>4</sub> (0.48 mmol, 101.8 mg) and 4-methylbenzoyl chloride (0.2 mmol, 30.9 mg) and was purified by silica gel column chromatography (PE/EtOAc = 5/1) to obtain **26** as colorless oil (15.7 mg, 41% yield); a 4.7:1 mixture of rotamers.

<sup>1</sup>H NMR (600 MHz, CDCl<sub>3</sub>) δ 7.88-7.80 (m, 2H), 7.27-7.24 (m, 2H), 4.82 (s, 1.65H), 4.72 (s, 0.35H), 3.09 (s, 2.5H), 2.99 (s, 0.5H), 2.43 (s, 0.5H), 2.40 (s, 2.5H), 2.19 (s, 2.5H), 1.98 (s, 0.5H);

<sup>13</sup>C NMR (151 MHz, CDCl<sub>3</sub>) δ 194.1, 193.1, 171.6, 171.5, 145.3, 144.6, 132.8, 132.3, 129.8, 129.5, 128.2, 128.0, 57.0, 54.0, 37.4, 35.3, 21.9, 21.8, 21.5, 21.3;

HRMS: (ESI) calcd for C<sub>12</sub>H<sub>16</sub>NO<sub>2</sub><sup>+</sup>[M+H]<sup>+</sup> 206.1176; found 206.1170.

### 3-(4-methylbenzoyl)cyclopentan-1-one (**27**)

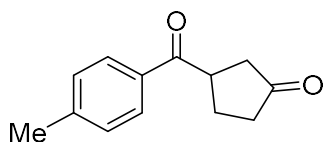

Chemical Formula: C<sub>13</sub>H<sub>14</sub>O<sub>2</sub>

Exact Mass: 202.0994

**27** was prepared according to general procedure **2.1** using NiBr<sub>2</sub>•dtbbpy (0.002 mmol, 1.0 mg), tetrabutylammonium decatungstate (0.004 mmol, 14.0 mg), cyclopentanone (2.0 mmol, 168.2 mg), anhydrous K<sub>3</sub>PO<sub>4</sub> (0.48 mmol, 101.8 mg) and 4-methylbenzoyl chloride (0.2 mmol, 30.9 mg) and was purified by silica gel column chromatography (PE/EtOAc = 20/1) to obtain **27** as colorless oil (19.9 mg, 47% yield).

The NMR data matched those reported in the literature.<sup>12</sup>

$^1\text{H}$  NMR (600 MHz,  $\text{CDCl}_3$ )  $\delta$  7.89 (d,  $J = 8.2$  Hz, 2H), 7.32-7.27 (m, 2H), 4.14-4.06 (m, 1H), 2.74-2.65 (m, 1H), 2.48-2.43 (m, 1H), 2.43 (s, 3H), 2.42-2.37 (m, 1H), 2.37-2.32 (m, 1H), 2.31-2.24 (m, 1H), 2.20-2.12 (m, 1H);

$^{13}\text{C}$  NMR (151 MHz,  $\text{CDCl}_3$ )  $\delta$  217.2, 200.0, 144.6, 133.2, 129.7, 128.7, 43.1, 41.2, 37.5, 27.2, 21.8.

### 3-(4-methylbenzoyl)cyclohexan-1-one (28)

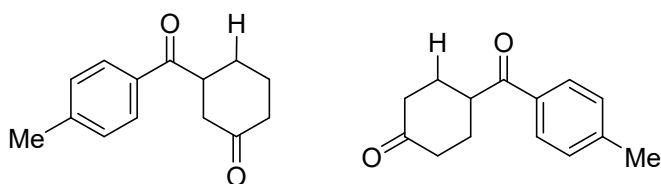

Chemical Formula:  $\text{C}_{14}\text{H}_{16}\text{O}_2$

Exact Mass: 216.1150

**28** was prepared according to general procedure **2.1** using  $\text{NiBr}_2 \cdot \text{dtbbpy}$  (0.002 mmol, 1.0 mg), tetrabutylammonium decatungstate (0.004 mmol, 14.0 mg), cyclohexanone (2.0 mmol, 196.3 mg), anhydrous  $\text{K}_3\text{PO}_4$  (0.48 mmol, 101.8 mg) and 4-methylbenzoyl chloride (0.2 mmol, 30.9 mg) and was purified by silica gel column chromatography (PE/EtOAc = 20/1) to obtain **28** as colorless oil (29.7 mg, 68% yield, r.r. = 3:2).

The NMR data matched those reported in the literature.<sup>12</sup>

$^1\text{H}$  NMR (600 MHz,  $\text{CDCl}_3$ )  $\delta$  7.89 (d,  $J = 8.2$  Hz, 0.8H), 7.85 (d,  $J = 8.3$  Hz, 1.2H), 7.31-7.27 (m, 2H), 3.85-3.75 (m, 0.6H), 3.69 (tt,  $J = 10.2, 3.8$  Hz, 0.4H), 2.75-2.69 (m, 0.6H), 2.61-2.51 (m, 0.9H), 2.50-2.44 (m, 1.1H), 2.43-2.36 (m, 4.4H), 2.24-2.19 (m, 1H), 2.13-2.00 (m, 2H), 1.89-1.80 (m, 1H);

$^{13}\text{C}$  NMR (151 MHz,  $\text{CDCl}_3$ )  $\delta$  210.6, 210.4, 200.1, 144.5, 144.3, 132.9, 129.7, 129.6, 128.6, 128.5, 45.2, 43.3, 42.7, 41.1, 40.1, 29.0, 28.6, 25.0, 21.8.

### (1,1-dioxidotetrahydrothiophen-3-yl)(p-tolyl)methanone (29)

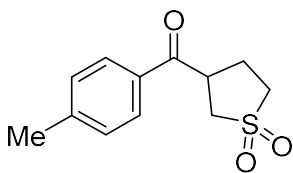

Chemical Formula: C<sub>12</sub>H<sub>14</sub>O<sub>3</sub>S

Exact Mass: 238.0664

**29** was prepared according to general procedure **2.1** using NiBr<sub>2</sub>•dtbbpy (0.002 mmol, 1.0 mg), tetrabutylammonium decatungstate (0.004 mmol, 14.0 mg), tetrahydrothiophene 1,1-dioxide (2.0 mmol, 240.3 mg), anhydrous K<sub>3</sub>PO<sub>4</sub> (0.48 mmol, 101.8 mg) and 4-methylbenzoyl chloride (0.2 mmol, 30.9 mg) and was purified by silica gel column chromatography (PE/EtOAc = 10/1) to obtain **29** as colorless oil (25.8 mg, 53% yield).

<sup>1</sup>H NMR (600 MHz, CDCl<sub>3</sub>) δ 7.85 (d, *J* = 8.3 Hz, 2H), 7.34-7.30 (m, 2H), 4.35-4.23 (m, 1H), 3.52-3.42 (m, 1H), 3.30-3.21 (m, 2H), 3.17-3.10 (m, 1H), 2.60-2.50 (m, 1H), 2.44 (s, 3H), 2.41-2.33 (m, 1H);

<sup>13</sup>C NMR (151 MHz, CDCl<sub>3</sub>) δ 196.3, 145.5, 132.2, 130.0, 128.8, 52.5, 50.8, 41.8, 25.9, 21.9;

HRMS: (ESI) calcd for C<sub>12</sub>H<sub>15</sub>O<sub>3</sub>S<sup>+</sup>[M+H]<sup>+</sup> 239.0736; found 239.0733.

### *N,N*-diphenylcyclohexanecarboxamide (**31**)

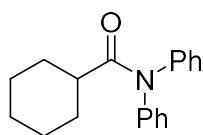

Chemical Formula: C<sub>19</sub>H<sub>21</sub>NO

Exact Mass: 279.1623

**31** was prepared according to general procedure **2.2** using NiCl<sub>2</sub>•dtbbpy (0.004 mmol, 1.6 mg), tetrabutylammonium decatungstate (0.004 mmol, 14.0 mg), cyclohexane (2 mmol, 168.0 mg), anhydrous K<sub>3</sub>PO<sub>4</sub> (0.4 mmol, 84.8 mg) and diphenylcarbamic chloride (0.2 mmol, 46.3 mg) and was purified by silica gel column chromatography (PE/EtOAc = 10/1) to obtain **31** as colorless oil (34.1 mg, 61% yield).

The NMR data matched those reported in the literature.<sup>13</sup>

$^1\text{H}$  NMR (600 MHz,  $\text{CDCl}_3$ )  $\delta$  7.42-7.31 (m, 5H), 7.28-7.20 (m, 5H), 2.38 (tt,  $J = 11.6$ , 3.4 Hz, 1H), 1.86-1.76 (m, 2H), 1.73-1.68 (m, 2H), 1.65-1.53 (m, 3H), 1.26-1.17 (m, 1H), 1.07-0.95 (m, 2H);

$^{13}\text{C}$  NMR (151 MHz,  $\text{CDCl}_3$ )  $\delta$  176.7, 143.1, 129.6, 128.9, 126.7, 42.3, 29.4, 25.6, 25.5.

### Isobutyl cyclohexanecarboxylate (**33**)

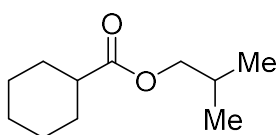

Chemical Formula:  $\text{C}_{11}\text{H}_{20}\text{O}_2$   
Exact Mass: 184.1463

**33** was prepared according to general procedure **2.3** using  $\text{NiBr}_2$  (0.02 mmol, 4.4 mg), dtbbpy (0.03 mmol, 8.0 mg), tetrabutylammonium decatungstate (0.004 mmol, 14.0 mg), cyclohexane (2 mmol, 168.0 mg), anhydrous  $\text{K}_3\text{PO}_4$  (0.4 mmol, 84.8 mg) and isobutyl carbonochloridate (0.2 mmol, 27.3 mg) and was purified by silica gel column chromatography (PE/EtOAc = 100/1) to obtain **33** as colorless oil (14.4 mg, 39% yield).

The NMR data matched those reported in the literature.<sup>14</sup>

$^1\text{H}$  NMR (600 MHz,  $\text{CDCl}_3$ )  $\delta$  3.81 (d,  $J = 6.6$  Hz, 2H), 2.27 (tt,  $J = 11.3$ , 3.7 Hz, 1H), 1.91-1.85 (m, 3H), 1.74-1.68 (m, 2H), 1.63-1.58 (m, 1H), 1.45-1.37 (m, 2H), 1.29-1.16 (m, 3H), 0.89 (d,  $J = 6.7$  Hz, 6H);

$^{13}\text{C}$  NMR (151 MHz,  $\text{CDCl}_3$ )  $\delta$  176.1, 70.1, 43.3, 29.0, 27.8, 25.8, 25.4, 19.0.

### (cyclohexylethynyl)triisopropylsilane (**34**)

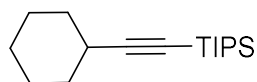

Chemical Formula:  $\text{C}_{17}\text{H}_{32}\text{Si}$   
Exact Mass: 264.2273

**34** was prepared according to general procedure **2.4** using  $\text{NiBr}_2 \cdot \text{dtbbpy}$  (0.02 mmol, 10.0 mg), tetrabutylammonium decatungstate (0.004 mmol, 14.0 mg), cyclohexane (2

mmol, 168.0 mg), anhydrous  $K_2HPO_4$  (0.3 mmol, 52.3 mg) and (bromoethynyl)triisopropylsilane (0.2 mmol, 52.1 mg) and was purified by silica gel column chromatography (PE) to obtain **34** as colorless oil (40.3 mg, 76% yield).

The NMR data matched those reported in the literature.<sup>15</sup>

$^1H$  NMR (600 MHz,  $CDCl_3$ )  $\delta$  2.50-42 (m, 1H), 1.80-1.70 (m, 4H), 1.53-1.44 (m, 3H), 1.39-1.28 (m, 3H), 1.13-1.03 (m, 21H);

$^{13}C$  NMR (151 MHz,  $CDCl_3$ )  $\delta$  113.6, 79.5, 32.7, 29.8, 26.0, 24.5, 18.6, 11.3

### (cyclohexylethynyl)benzene (35)

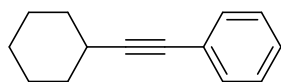

Chemical Formula:  $C_{14}H_{16}$   
Exact Mass: 184.2820

**35** was prepared according to general procedure **2.4** using  $NiBr_2 \cdot dtbbpy$  (0.02 mmol, 10.0 mg), tetrabutylammonium decatungstate (0.004 mmol, 14.0 mg), cyclohexane (2 mmol, 168.0 mg), anhydrous  $K_2HPO_4$  (0.3 mmol, 52.3 mg) and (bromoethynyl)benzene (0.2 mmol, 36.2 mg) and was purified by silica gel column chromatography (PE) to obtain **35** as colorless oil (18.8 mg, 51% yield).

The NMR data matched those reported in the literature.<sup>16</sup>

$^1H$  NMR (600 MHz,  $CDCl_3$ )  $\delta$  7.41-7.38 (m, 2H), 7.29-7.23 (m, 3H), 2.62-2.55 (m, 1H), 1.92-1.86 (m, 2H), 1.79-1.74 (m, 2H), 1.57-1.51 (m, 3H), 1.39-1.32 (m, 3H);

$^{13}C$  NMR (151 MHz,  $CDCl_3$ )  $\delta$  131.6, 128.2, 127.4, 124.1, 94.5, 80.5, 32.7, 29.7, 26.0, 24.9.

### 1-(cyclohexylethynyl)-4-methoxybenzene (36)

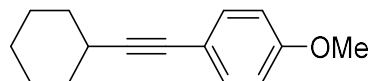

Chemical Formula:  $C_{15}H_{18}O$   
Exact Mass: 214.1358

**36** was prepared according to general procedure **2.4** using  $NiBr_2 \cdot dtbbpy$  (0.02 mmol, 10.0 mg), tetrabutylammonium decatungstate (0.004 mmol, 14.0 mg), cyclohexane (2

mmol, 168.0 mg), anhydrous  $K_2HPO_4$  (0.3 mmol, 52.3 mg) and 1-(bromoethynyl)-4-methoxybenzene (0.2 mmol, 42.2 mg) and was purified by silica gel column chromatography (PE) to obtain **36** as colorless oil (26.9 mg, 63% yield).

The NMR data matched those reported in the literature.<sup>17</sup>

$^1H$  NMR (600 MHz,  $CDCl_3$ )  $\delta$  7.35-7.31 (m, 2H), 6.83-6.78 (m, 2H), 3.79 (s, 3H), 2.59-2.53 (m, 1H), 1.90-1.84 (m, 2H), 1.79-1.72 (m, 2H), 1.55-1.48 (m, 3H), 1.37-1.30 (m, 3H);

$^{13}C$  NMR (151 MHz,  $CDCl_3$ )  $\delta$  158.9, 132.9, 116.3, 113.7, 92.8, 80.1, 55.2, 32.8, 29.7, 25.9, 24.9.

#### **methyl 4-(cyclohexylethynyl)benzoate (37)**

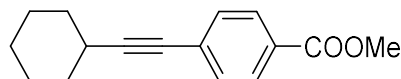

Chemical Formula:  $C_{16}H_{18}O_2$

Exact Mass: 242.1307

**37** was prepared according to general procedure **2.4** using  $NiBr_2 \cdot dtbbpy$  (0.02 mmol, 10.0 mg), tetrabutylammonium decatungstate (0.004 mmol, 14.0 mg), cyclohexane (2 mmol, 168.0 mg), anhydrous  $K_2HPO_4$  (0.3 mmol, 52.3 mg) and methyl 4-(bromoethynyl)benzoate (0.2 mmol, 47.8 mg) and was purified by silica gel column chromatography (PE/EtOAc = 100/1) to obtain **37** as colorless oil (22.3 mg, 46% yield).

The NMR data matched those reported in the literature.<sup>17</sup>

$^1H$  NMR (600 MHz,  $CDCl_3$ )  $\delta$  7.96-7.92 (m, 2H), 7.47-7.39 (m, 2H), 3.90 (s, 3H), 2.66-2.56 (m, 1H), 1.92-1.86 (m, 2H), 1.78-1.73 (m, 2H), 1.58-1.50 (m, 3H), 1.39-1.30 (m, 3H);

$^{13}C$  NMR (151 MHz,  $CDCl_3$ )  $\delta$  166.7, 131.5, 129.3, 129.0, 128.7, 97.9, 80.0, 52.1, 32.5, 29.7, 25.8, 24.8.

#### **tert-butyl((1-(cyclohexylethynyl)cyclohexyl)oxy)dimethylsilane (38)**

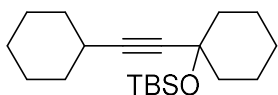

Chemical Formula: C<sub>20</sub>H<sub>36</sub>OSi  
Exact Mass: 320.2535

**38** was prepared according to general procedure **2.4** using NiBr<sub>2</sub>•dtbbpy (0.02 mmol, 10.0 mg), tetrabutylammonium decatungstate (0.004 mmol, 14.0 mg), cyclohexane (2 mmol, 168.0 mg), anhydrous K<sub>2</sub>HPO<sub>4</sub> (0.3 mmol, 52.3 mg) and ((1-(bromoethynyl)cyclohexyl)oxy)(tert-butyl)dimethylsilane (0.2 mmol, 63.5 mg) and was purified by silica gel column chromatography (PE) to obtain **38** as colorless oil (51.5 mg, 80% yield).

<sup>1</sup>H NMR (600 MHz, CDCl<sub>3</sub>) δ 2.45-2.33 (m, 1H), 1.84-1.76 (m, 2H), 1.75-1.68 (m, 4H), 1.66-1.57 (m, 3H), 1.55-1.49 (m, 3H), 1.48-1.37 (m, 4H), 1.35-1.25 (m, 4H), 0.87 (s, 9H), 0.16 (s, 6H);

<sup>13</sup>C NMR (151 MHz, CDCl<sub>3</sub>) δ 89.0, 84.5, 69.2, 41.5, 32.8, 29.1, 25.9, 25.9, 25.5, 25.0, 23.0, 18.1, -2.8.

HRMS: (ESI) calcd for C<sub>20</sub>H<sub>37</sub>OSi<sup>+</sup>[M+H]<sup>+</sup> 321.2608; found 321.2600.

#### tert-butyl((3-cyclohexyl-1,1-diphenylprop-2-yn-1-yl)oxy)dimethylsilane (**39**)

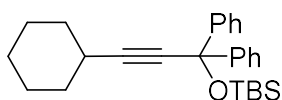

Chemical Formula: C<sub>27</sub>H<sub>36</sub>OSi  
Exact Mass: 404.2535

**39** was prepared according to general procedure **2.4** using NiBr<sub>2</sub>•dtbbpy (0.02 mmol, 10.0 mg), tetrabutylammonium decatungstate (0.004 mmol, 14.0 mg), cyclohexane (2 mmol, 168.0 mg), anhydrous K<sub>2</sub>HPO<sub>4</sub> (0.3 mmol, 52.3 mg) and ((3-bromo-1,1-diphenylprop-2-yn-1-yl)oxy)(tert-butyl)dimethylsilane (0.2 mmol, 80.3 mg) and was purified by silica gel column chromatography (PE) to obtain **39** as colorless oil (41.5 mg, 51% yield).

<sup>1</sup>H NMR (600 MHz, CDCl<sub>3</sub>) δ 7.60-7.57 (m, 4H), 7.28-7.24 (m, 4H), 7.20-7.17 (m, 2H), 2.56-2.50 (m, 1H), 1.94-1.87 (m, 2H), 1.77-1.73 (m, 2H), 1.58-1.53 (m, 3H), 1.37-1.31 (m, 3H), 0.97 (s, 9H), 0.02 (s, 6H);



$^{13}\text{C}$  NMR (151 MHz,  $\text{CDCl}_3$ )  $\delta$  147.5, 127.7, 126.8, 126.0, 93.2, 82.9, 75.4, 32.5, 29.4, 26.1, 25.8, 25.1, 18.5, -3.1.

HRMS: (APCI) calcd for  $\text{C}_{27}\text{H}_{37}\text{OSi}^+[\text{M}+\text{H}]^+$  405.2608; found 405.2608.

#### 2-(3-cyclohexylprop-2-yn-1-yl)-2-methylcyclopentane-1,3-dione (**40**)

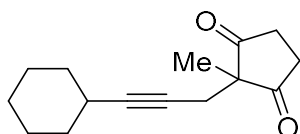

Chemical Formula:  $\text{C}_{15}\text{H}_{20}\text{O}_2$   
Exact Mass: 232.1463

**40** was prepared according to general procedure **2.4** using  $\text{NiBr}_2\cdot\text{dtbbpy}$  (0.02 mmol, 10.0 mg), tetrabutylammonium decatungstate (0.004 mmol, 14.0 mg), cyclohexane (2 mmol, 168.0 mg), anhydrous  $\text{K}_2\text{HPO}_4$  (0.3 mmol, 52.3 mg) and 2-(3-bromoprop-2-yn-1-yl)-2-methylcyclopentane-1,3-dione (0.2 mmol, 45.8 mg) and was purified by silica gel column chromatography (PE/EA = 50/1) to obtain **40** as colorless oil (23.0 mg, 50% yield).

$^1\text{H}$  NMR (600 MHz,  $\text{CDCl}_3$ )  $\delta$  2.77 (s, 4H), 2.41 (d, 2H), 2.26-2.20 (m, 1H), 1.73-1.67 (m, 2H), 1.64-1.59 (m, 2H), 1.51-1.44 (m, 1H), 1.31-1.20 (m, 5H), 1.07 (s, 3H);

$^{13}\text{C}$  NMR (151 MHz,  $\text{CDCl}_3$ )  $\delta$  216.0, 87.3, 74.2, 55.7, 36.1, 32.8, 28.8, 25.8, 25.7, 24.8, 18.6.

HRMS: (ESI) calcd for  $\text{C}_{15}\text{H}_{21}\text{O}_2^+[\text{M}+\text{H}]^+$  233.1536; found 233.1538.

#### (cyclopentylethynyl)triisopropylsilane (**41**)

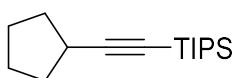

Chemical Formula:  $\text{C}_{16}\text{H}_{30}\text{Si}$   
Exact Mass: 250.2117

**41** was prepared according to general procedure **2.4** using  $\text{NiBr}_2\cdot\text{dtbbpy}$  (0.02 mmol, 10.0 mg), tetrabutylammonium decatungstate (0.004 mmol, 14.0 mg), cyclopentane (2 mmol, 140.3 mg), anhydrous  $\text{K}_2\text{HPO}_4$  (0.3 mmol, 52.3 mg) and

(bromoethynyl)triisopropylsilane (0.2 mmol, 52.1 mg) and was purified by silica gel column chromatography (PE) to obtain **41** as colorless oil (32.5 mg, 65% yield).

The NMR data matched those reported in the literature.<sup>15</sup>

<sup>1</sup>H NMR (600 MHz, CDCl<sub>3</sub>) δ 2.70-2.64 (m, 1H), 1.93-1.86 (m, 2H), 1.76-1.70 (m, 2H), 1.67-1.61 (m, 2H), 1.57-1.53 (m, 2H), 1.09-1.02 (m, 21H);

<sup>13</sup>C NMR (151 MHz, CDCl<sub>3</sub>) δ 114.1, 79.0, 34.2, 31.2, 24.9, 18.6, 11.3.

### (cyclooctylethynyl)triisopropylsilane (**42**)

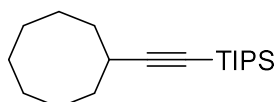

Chemical Formula: C<sub>19</sub>H<sub>36</sub>Si

Exact Mass: 292.2586

**42** was prepared according to general procedure **2.4** using NiBr<sub>2</sub>•dtbbpy (0.02 mmol, 10.0 mg), tetrabutylammonium decatungstate (0.004 mmol, 14.0 mg), cyclooctane (2 mmol, 224.4mg), anhydrous K<sub>2</sub>HPO<sub>4</sub> (0.3 mmol, 52.3 mg) and (bromoethynyl)triisopropylsilane (0.2 mmol, 52.1 mg) and was purified by silica gel column chromatography (PE) to obtain **42** as colorless oil (24.5 mg, 42% yield).

The NMR data matched those reported in the literature.<sup>15</sup>

<sup>1</sup>H NMR (600 MHz, CDCl<sub>3</sub>) δ 2.65-2.60 (m, 1H), 1.89-1.83 (m, 2H), 1.79-1.73 (m, 2H), 1.73-1.65 (m, 3H), 1.55-1.51 (m, 4H), 1.50-1.46 (m, 3H), 1.07-1.04 (m, 21H);

<sup>13</sup>C NMR (151 MHz, CDCl<sub>3</sub>) δ 114.5, 79.4, 31.7, 31.2, 27.5, 25.4, 24.4, 18.7, 11.3.

### N-methyl-N-(3-(triisopropylsilyl)prop-2-yn-1-yl)acetamide (**43**)

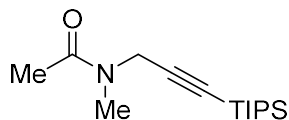

Chemical Formula: C<sub>15</sub>H<sub>29</sub>NOSi

Exact Mass: 267.2018

**43** was prepared according to general procedure **2.4** using NiBr<sub>2</sub>•dtbbpy (0.02 mmol, 10.0 mg), tetrabutylammonium decatungstate (0.004 mmol, 14.0 mg), N,N-dimethylacetamide (2.0 mmol, 174.2 mg), anhydrous K<sub>2</sub>HPO<sub>4</sub> (0.3 mmol, 52.3 mg) and (bromoethynyl)triisopropylsilane (0.2 mmol, 52.1 mg) and was purified by

silica gel column chromatography (PE/EtOAc = 10/1) to obtain **43** as colorless oil (27.3 mg, 51% yield); a 1.2:1 mixture of rotamers.

The NMR data matched those reported in the literature.<sup>18</sup>

<sup>1</sup>H NMR (600 MHz, CDCl<sub>3</sub>) δ 4.29 (s, 1.1H), 4.06 (s, 0.9H), 3.07 (s, 1.7H), 2.99 (s, 1.3H), 2.16 (s, 1.3H), 2.09 (s, 1.7H), 1.05 (s, 3H), 1.05 (s, 18H);

<sup>13</sup>C NMR (151 MHz, CDCl<sub>3</sub>) δ 170.5, 170.1, 102.2, 101.2, 86.0, 85.0, 41.3, 36.7, 34.7, 33.1, 21.7, 21.4, 18.5, 18.5, 11.1, 11.0.

#### triisopropyl((tetrahydrofuran-2-yl)ethynyl)silane (**44**)

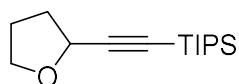

Chemical Formula: C<sub>15</sub>H<sub>28</sub>OSi  
Exact Mass: 252.1909

**44** was prepared according to general procedure **2.5** using Ni(acac)<sub>2</sub> (0.02 mmol, 5.1 mg), dtbbpy (0.03 mmol, 8.0 mg), 4-(4-methoxybenzoyl)benzotrile (0.02 mmol, 4.7 mg), anhydrous Na<sub>2</sub>CO<sub>3</sub> (0.4 mmol, 42.0 mg), tetrahydrofuran (1 mL) as solvent and (bromoethynyl)triisopropylsilane (0.2 mmol, 52.1 mg) and was purified by silica gel column chromatography (PE/EtOAc = 20/1) to obtain **44** as colorless oil (41.9 mg, 83% yield).

The NMR data matched those reported in the literature.<sup>18</sup>

<sup>1</sup>H NMR (600 MHz, CDCl<sub>3</sub>) δ 4.62 (dd, *J* = 7.3, 4.6 Hz, 1H), 3.97-3.94 (m, 1H), 3.84-3.80 (m, 1H), 2.17-2.11 (m, 1H), 2.06-1.97 (m, 2H), 1.92-1.86 (m, 1H), 1.07-1.05 (m, 21H);

<sup>13</sup>C NMR (151 MHz, CDCl<sub>3</sub>) δ 107.8, 85.0, 68.6, 67.5, 33.7, 25.1, 18.6, 11.1.

#### ((1,4-dioxan-2-yl)ethynyl)triisopropylsilane (**45**)

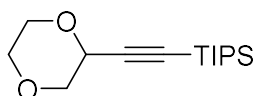

Chemical Formula: C<sub>15</sub>H<sub>28</sub>O<sub>2</sub>Si  
Exact Mass: 268.1859

**45** was prepared according to general procedure **2.5** using Ni(acac)<sub>2</sub> (0.02 mmol, 5.1 mg), dtbbpy (0.03 mmol, 8.0 mg), 4-(4-methoxybenzoyl)benzotrile (0.02 mmol, 4.7 mg), anhydrous Na<sub>2</sub>CO<sub>3</sub> (0.4 mmol, 42.0 mg), 1,4-dioxane (1 mL) as solvent and (bromoethynyl)triisopropylsilane (0.2 mmol, 52.1 mg) and was purified by silica gel column chromatography (PE/EtOAc = 20/1) to obtain **45** as colorless oil (17.2 mg, 32% yield).

The NMR data matched those reported in the literature.<sup>18</sup>

<sup>1</sup>H NMR (600 MHz, CDCl<sub>3</sub>) δ 4.37 (dd, *J* = 8.3, 2.9 Hz, 1H), 3.92-3.88 (m, 1H), 3.84 (dd, *J* = 11.5, 2.9 Hz, 1H), 3.69-3.66 (m, 3H), 3.59 (dd, *J* = 11.5, 8.3 Hz, 1H), 1.07-1.06 (m, 21H);

<sup>13</sup>C NMR (151 MHz, CDCl<sub>3</sub>) δ 102.5, 87.9, 70.6, 66.5, 66.3, 65.6, 18.5, 11.0.

#### (benzo[d][1,3]dioxol-2-ylethynyl)triisopropylsilane (**46**)

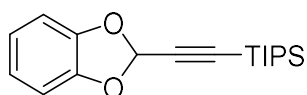

Chemical Formula: C<sub>18</sub>H<sub>26</sub>O<sub>2</sub>Si

Exact Mass: 302.1702

**46** was prepared according to general procedure **2.5** using Ni(acac)<sub>2</sub> (0.02 mmol, 5.1 mg), dtbbpy (0.03 mmol, 8.0 mg), 4-(4-methoxybenzoyl)benzotrile (0.02 mmol, 4.7 mg), anhydrous Na<sub>2</sub>CO<sub>3</sub> (0.4 mmol, 42.0 mg), benzo[d][1,3]dioxole (1 mL) as solvent and (bromoethynyl)triisopropylsilane (0.2 mmol, 52.1 mg) and was purified by silica gel column chromatography (PE/EtOAc = 20/1) to obtain **46** as colorless oil (21.8 mg, 36% yield).

The NMR data matched those reported in the literature.<sup>18</sup>

<sup>1</sup>H NMR (600 MHz, CDCl<sub>3</sub>) δ 6.85 (s, 4H), 6.58 (s, 1H), 1.08-1.07 (m, 21H);

<sup>13</sup>C NMR (151 MHz, CDCl<sub>3</sub>) δ 146.7, 121.8, 108.9, 99.6, 98.1, 90.9, 18.4, 10.9.

#### (3-(tert-butoxy)prop-1-yn-1-yl)triisopropylsilane (**47**)

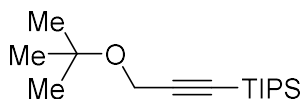

Chemical Formula: C<sub>16</sub>H<sub>32</sub>O<sub>2</sub>Si

Exact Mass: 268.2222

**47** was prepared according to general procedure **2.5** using Ni(acac)<sub>2</sub> (0.02 mmol, 5.1 mg), dtbbpy (0.03 mmol, 8.0 mg), 4-(4-methoxybenzoyl)benzotrile (0.02 mmol, 4.7 mg), anhydrous Na<sub>2</sub>CO<sub>3</sub> (0.4 mmol, 42.0 mg), 2-methoxy-2-methylpropane (1 mL) as solvent and (bromoethynyl)triisopropylsilane (0.2 mmol, 52.1 mg) and was purified by silica gel column chromatography (PE/EtOAc = 20/1) to obtain **47** as colorless oil (22.1 mg, 41% yield).

The NMR data matched those reported in the literature.<sup>18</sup>

<sup>1</sup>H NMR (600 MHz, CDCl<sub>3</sub>) δ 4.14 (s, 2H), 1.25 (s, 9H), 1.08-1.05 (m, 21H);

<sup>13</sup>C NMR (151 MHz, CDCl<sub>3</sub>) δ 106.2, 85.4, 74.6, 51.2, 27.8, 18.6, 11.2.

#### (3,4-dimethoxybut-1-yn-1-yl)triisopropylsilane (**48**)

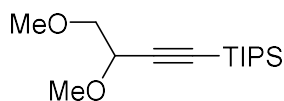

Chemical Formula: C<sub>15</sub>H<sub>30</sub>O<sub>2</sub>Si

Exact Mass: 270.2015

**48** was prepared according to general procedure **2.5** using Ni(acac)<sub>2</sub> (0.02 mmol, 5.1 mg), dtbbpy (0.03 mmol, 8.0 mg), 4-(4-methoxybenzoyl)benzotrile (0.02 mmol, 4.7 mg), anhydrous Na<sub>2</sub>CO<sub>3</sub> (0.4 mmol, 42.0 mg), 1,2-dimethoxyethane (1 mL) as solvent and (bromoethynyl)triisopropylsilane (0.2 mmol, 52.1 mg) and was purified by silica gel column chromatography (PE/EtOAc = 20/1) to obtain **48** as colorless oil (22.7 mg, 42% yield).

The NMR data matched those reported in the literature.<sup>18</sup>

<sup>1</sup>H NMR (600 MHz, CDCl<sub>3</sub>) δ 4.22 (dd, *J* = 8.0, 3.4 Hz, 1H), 3.61-3.53 (m, 2H), 3.47 (s, 3H), 3.41 (s, 3H), 1.08-1.06 (m, 21H);

<sup>13</sup>C NMR (151 MHz, CDCl<sub>3</sub>) δ 103.0, 88.1, 75.0, 71.0, 59.2, 56.5, 18.5, 11.1.

## 6. Synthetic Applications

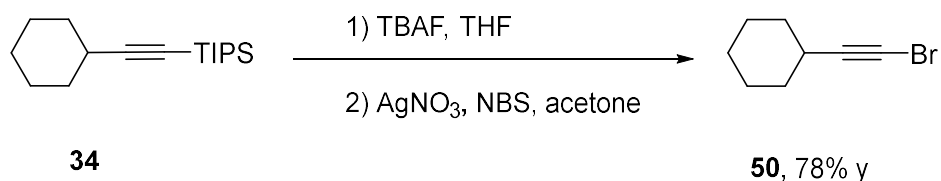

To the solution of **34** (211.6 mg, 0.8 mmol) in THF (2.0 mL) and 2 mL TBAF (1.0 M in THF) was added under Ar atmosphere, and was stirred at room temperature for 2 h. Saturated NH<sub>4</sub>Cl aqueous solution (10 mL) was added to the reaction mixture, and the product was extracted with AcOEt (10 mL × 3). The combined extracts were washed by brine (10 mL), dried over Na<sub>2</sub>SO<sub>4</sub> and concentrated under reduced pressure to give the terminal alkyne, which was used in the next step without further purification.

The terminal alkyne was dissolved in acetone (2.0 mL). Then, AgNO<sub>3</sub> (13.6 mg, 0.1 equiv.), NBS (156.6 mg, 1.1 equiv.) were added. The mixture was stirred at room temperature for 4 h. After the reaction was completed, concentrated the mixture and purified by chromatography on silica gel (PE) to afford the bromide alkyne **50** as color less liquid (116.7 mg, 78% yield).

The NMR data matched those reported in the literature.<sup>19</sup>

<sup>1</sup>H NMR (600 MHz, CDCl<sub>3</sub>) δ 2.45-2.34 (m, 1H), 1.83-1.74 (m, 2H), 1.73-1.64 (m, 2H), 1.53-1.41 (m, 3H), 1.34-1.26 (m, 3H);

<sup>13</sup>C NMR (151 MHz, CDCl<sub>3</sub>) δ 84.4, 37.7, 32.3, 30.1, 25.8, 24.8.

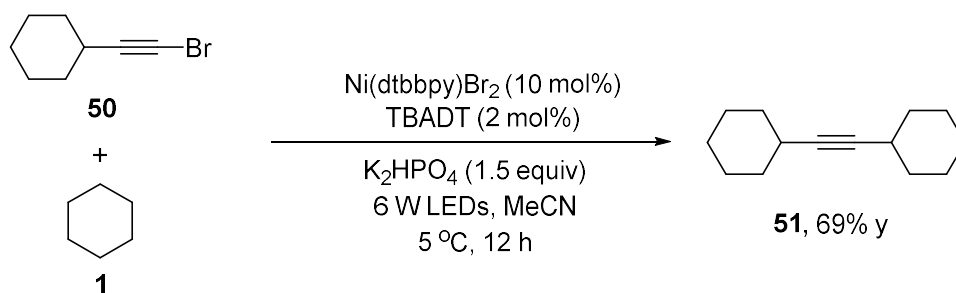

An oven-dried 10-mL vial equipped with a PTFE-coated stir bar was charged with NiBr<sub>2</sub>•dtbbpy (9.8 mg, 0.02 mmol), tetrabutylammonium decatungstate (14.0 mg, 0.004 mmol), **50** (37.4 mg, 0.2 mmol), anhydrous K<sub>2</sub>HPO<sub>4</sub> (50 mg, 0.3 mmol), cyclohexane (168 mg, 2.0 mmol) and dry MeCN (1.0 mL) in an argon-filled glovebox. The vial was sealed and removed from the glovebox. The reaction mixture was stirred and irradiated using a 6 W 390 nm LED lamp at 5 °C for 12 hours. The resulting mixture was diluted with ethyl acetate and passed through a pad of celite. The celite plug was further washed with ethyl acetate. Solvent was removed under reduced pressure, and the residue was purified by column chromatography on silica gel (PE) to afford **51** as colorless liquid (26.3 mg, 69% yield).

The NMR data matched those reported in the literature.<sup>20</sup>

<sup>1</sup>H NMR (600 MHz, CDCl<sub>3</sub>) δ 2.38-2.29 (m, 2H), 1.82-1.73 (m, 4H), 1.72-1.65 (m, 4H), 1.53-1.44 (m, 2H), 1.45-1.35 (m, 4H), 1.33-1.23 (m, 6H);

<sup>13</sup>C NMR (151 MHz, CDCl<sub>3</sub>) δ 84.5, 33.2, 29.0, 26.0, 24.9.

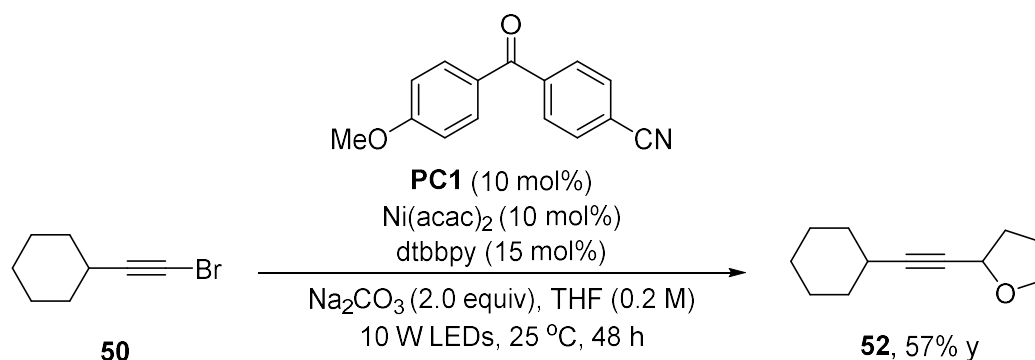

An oven-dried 10-mL vial equipped with a PTFE-coated stir bar was charged with Ni(acac)<sub>2</sub> (5.6 mg, 0.02 mmol), dtbbpy (7.7 mg, 0.03 mmol), **PC1** (5.6 mg, 0.02 mmol), **50** (37.4 mg, 0.2 mmol), anhydrous Na<sub>2</sub>CO<sub>3</sub> (42.3 mg, 0.4 mmol) and THF (1.0 mL) as both C-H partners and solvent in an argon-filled glovebox. The vial was sealed and removed from the glovebox. The reaction mixture was stirred and irradiated using a 10 W 390 nm LED lamp at 25 °C for 48 hours. The resulting mixture was diluted with ethyl acetate and passed through a pad of celite. The celite plug was further washed with ethyl acetate. Solvent was removed under reduced pressure, and the residue was purified by column chromatography on silica gel (PE/EA = 50/1) to afford **52** as colorless liquid (20.3 mg, 57% yield).

<sup>1</sup>H NMR (600 MHz, CDCl<sub>3</sub>) δ 4.56 (ddd, *J* = 7.3, 5.7, 1.8 Hz, 1H), 3.97-3.92 (m, 1H), 3.80-3.74 (m, 1H), 2.42-2.34 (m, 1H), 2.15-2.09 (m, 1H), 2.04-1.98 (m, 1H), 1.94-1.86 (m, 2H), 1.80-1.74 (m, 2H), 1.72-1.67 (m, 2H), 1.52-1.47 (m, 1H), 1.44-1.38 (m, 2H), 1.30-1.25 (m, 3H);

<sup>13</sup>C NMR (151 MHz, CDCl<sub>3</sub>) δ 89.3, 79.8, 68.5, 67.6, 33.7, 32.6, 29.1, 25.9, 25.4, 24.9;

HRMS: (ESI) calcd for C<sub>12</sub>H<sub>19</sub>O<sup>+</sup>[M+H]<sup>+</sup> 179.1430; found 179.1424.



## 7. NMR Spectra

3

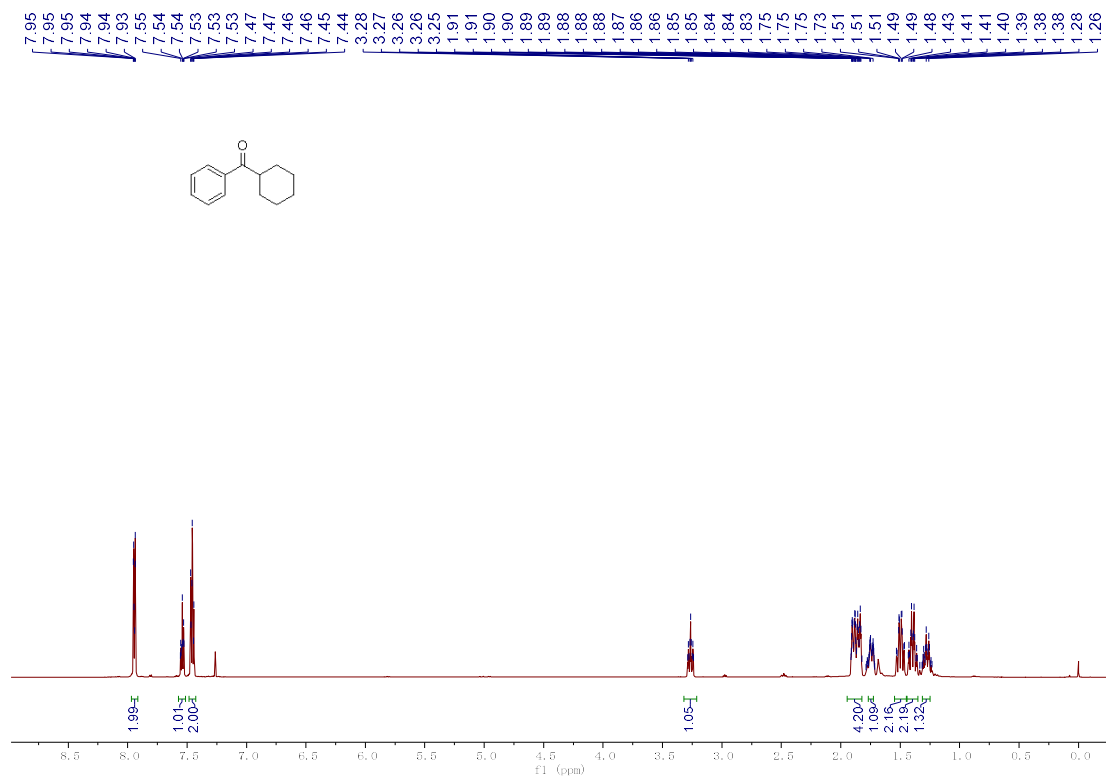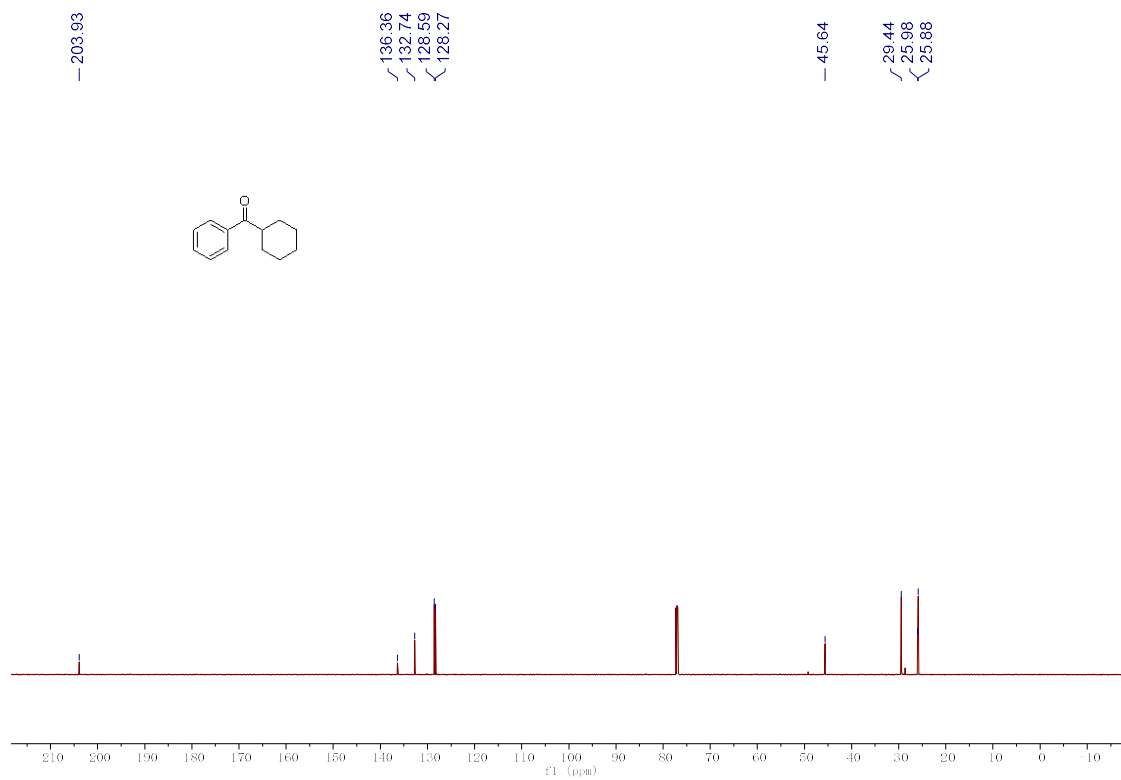

6

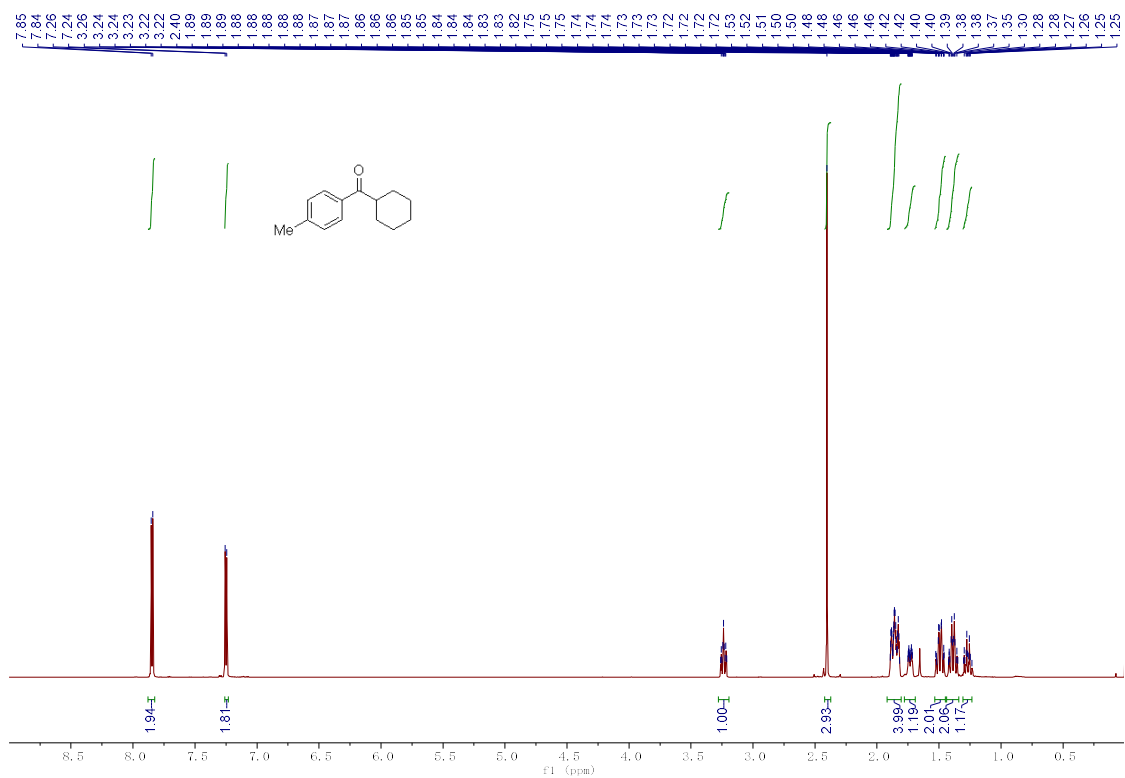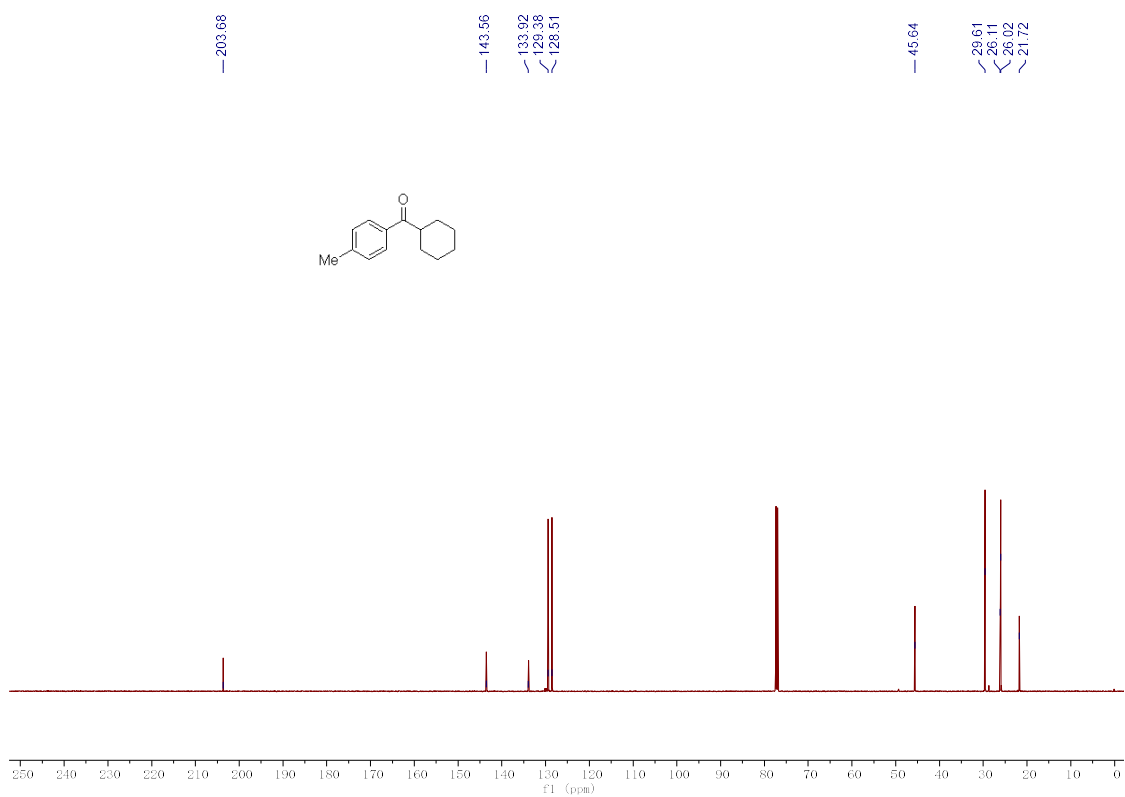

7

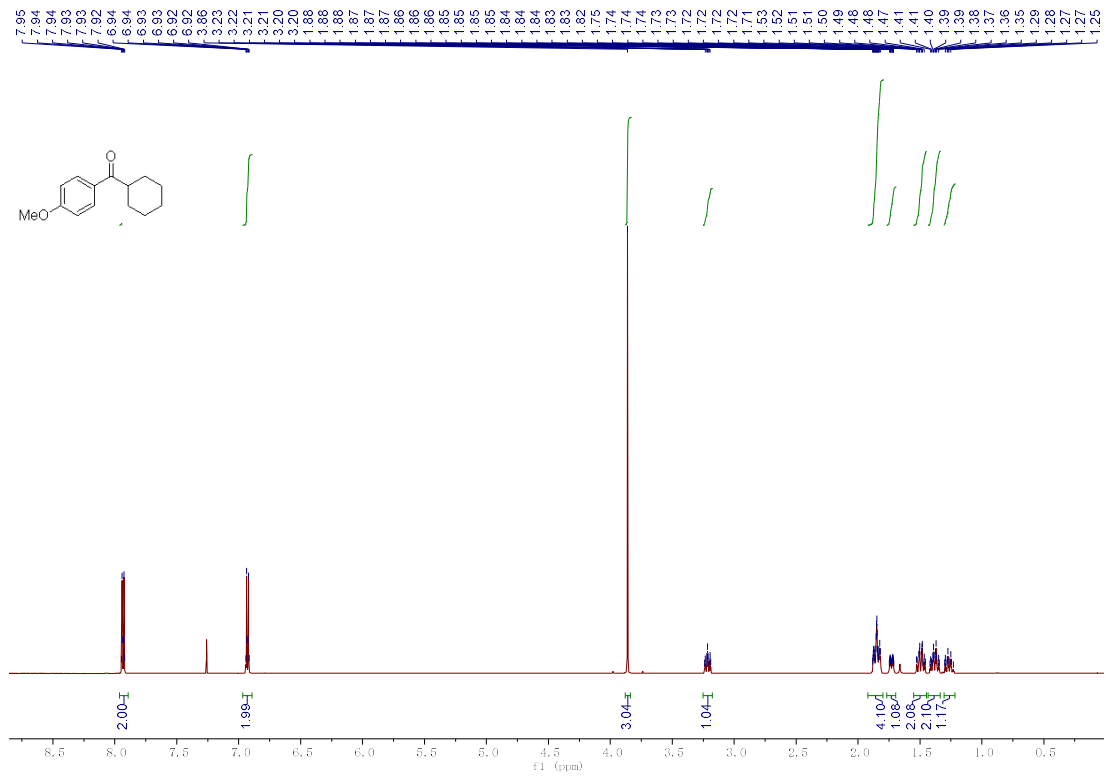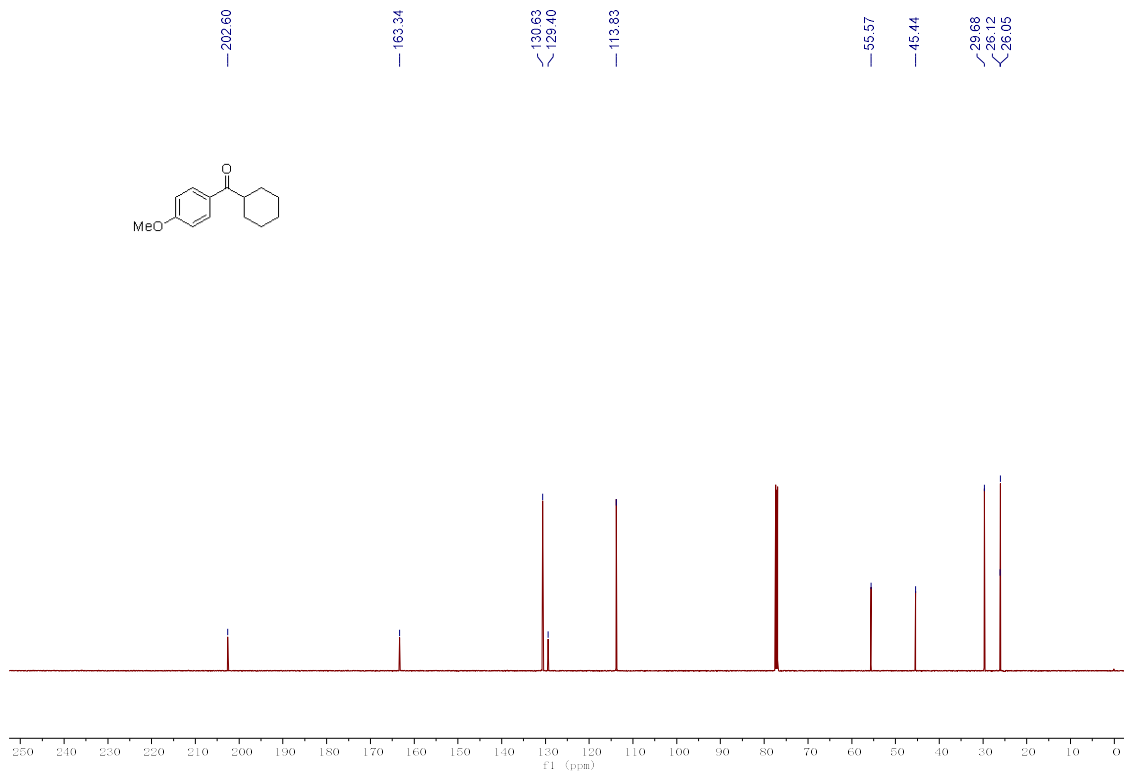

8

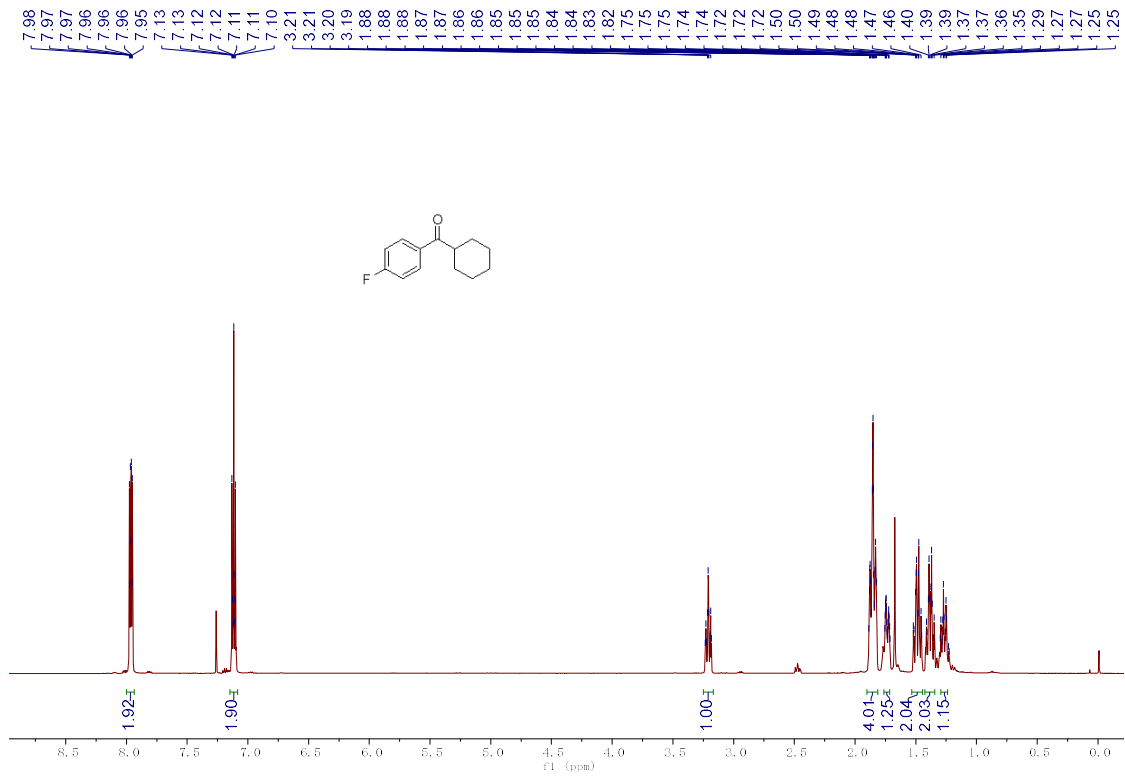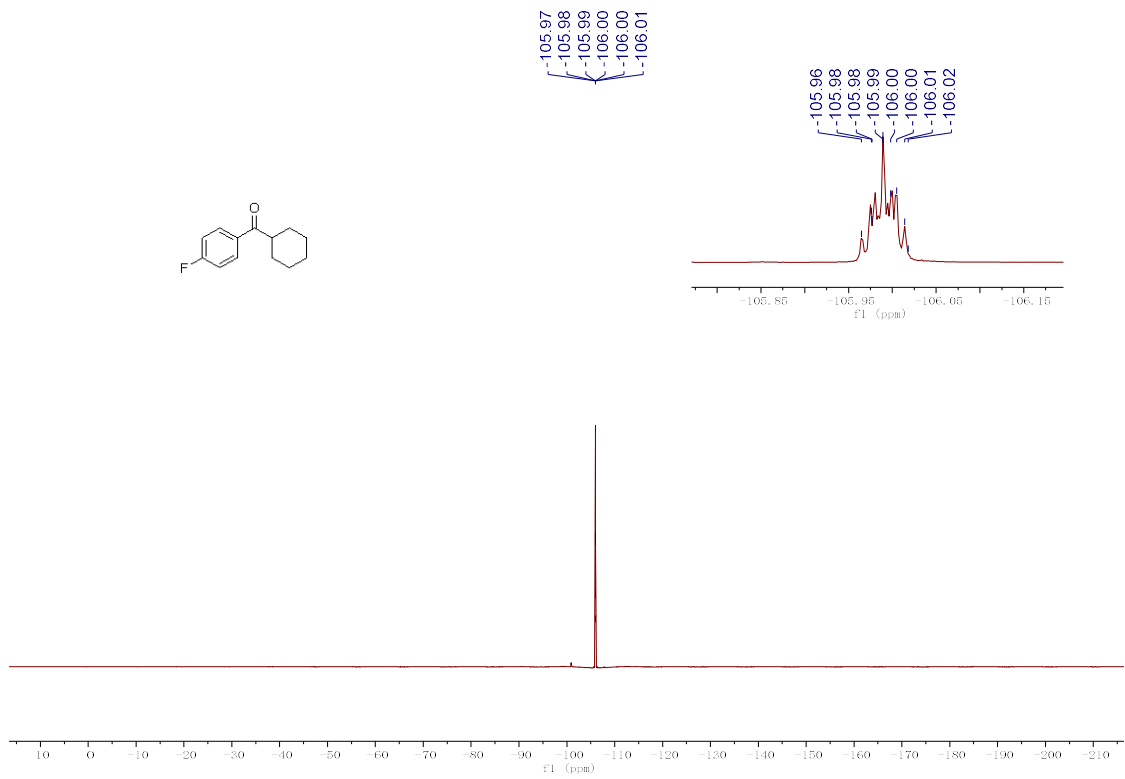

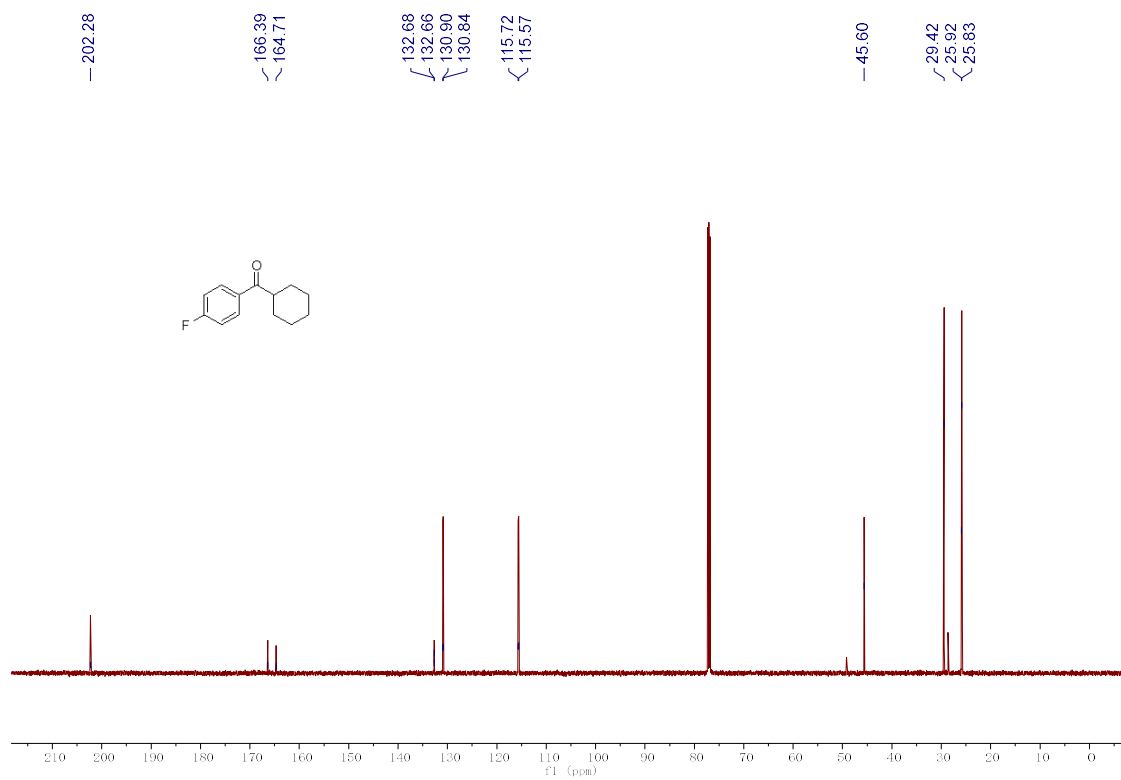

9

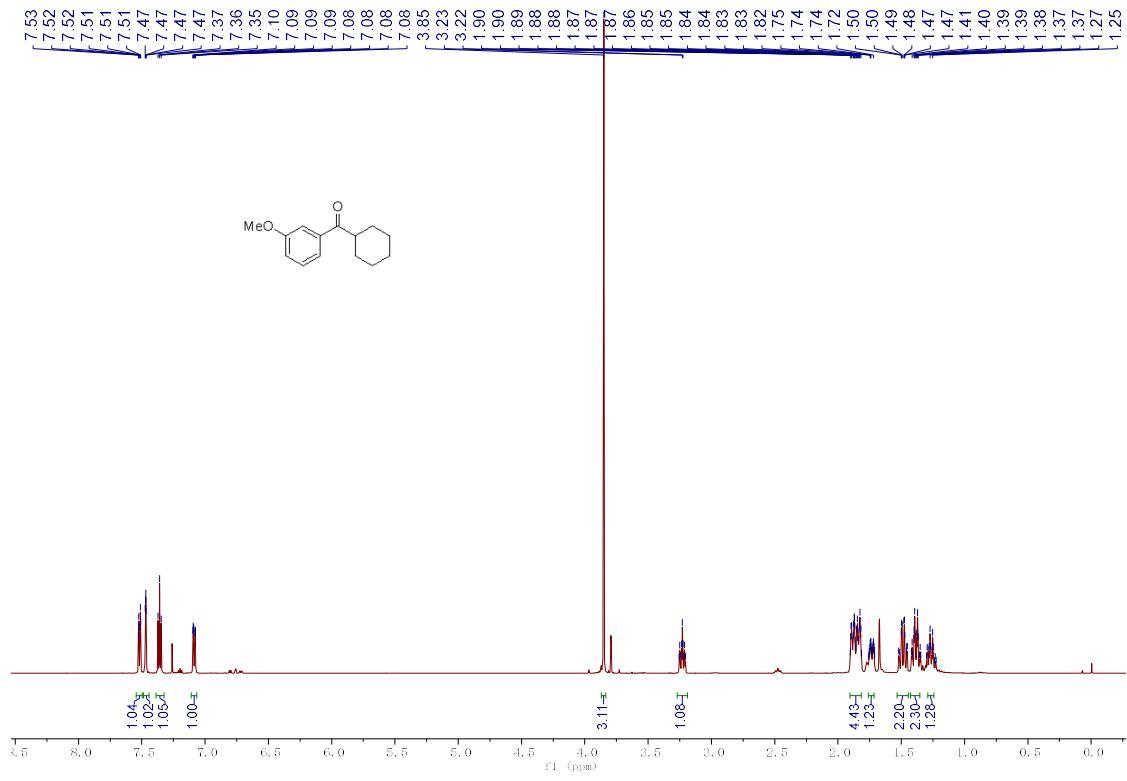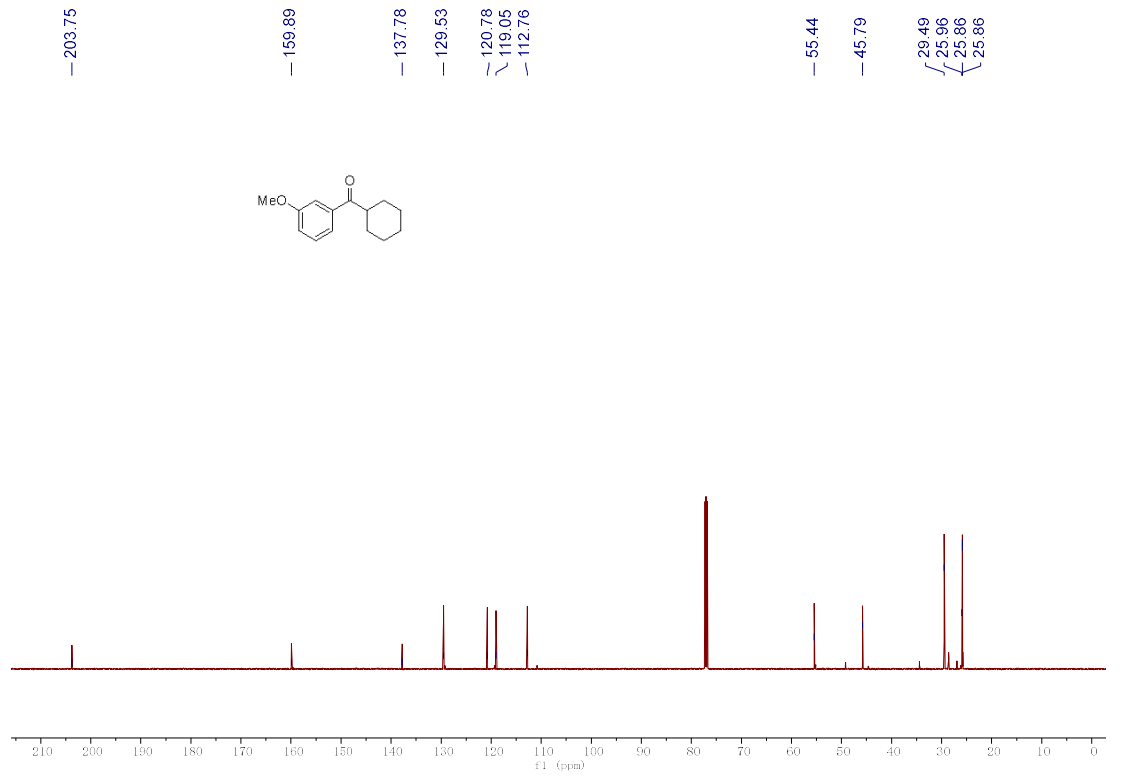

10

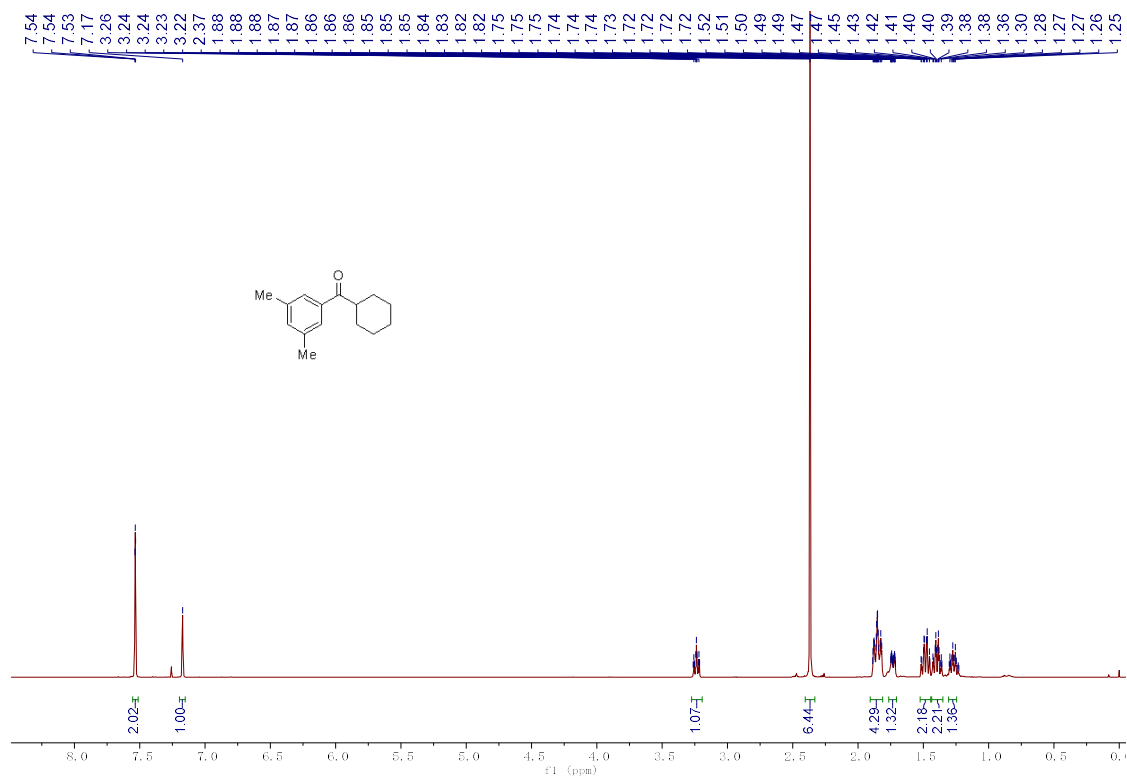

— 204.33

138.10  
136.50  
134.29  
— 125.93

— 45.59

29.41  
25.92  
25.81  
21.22

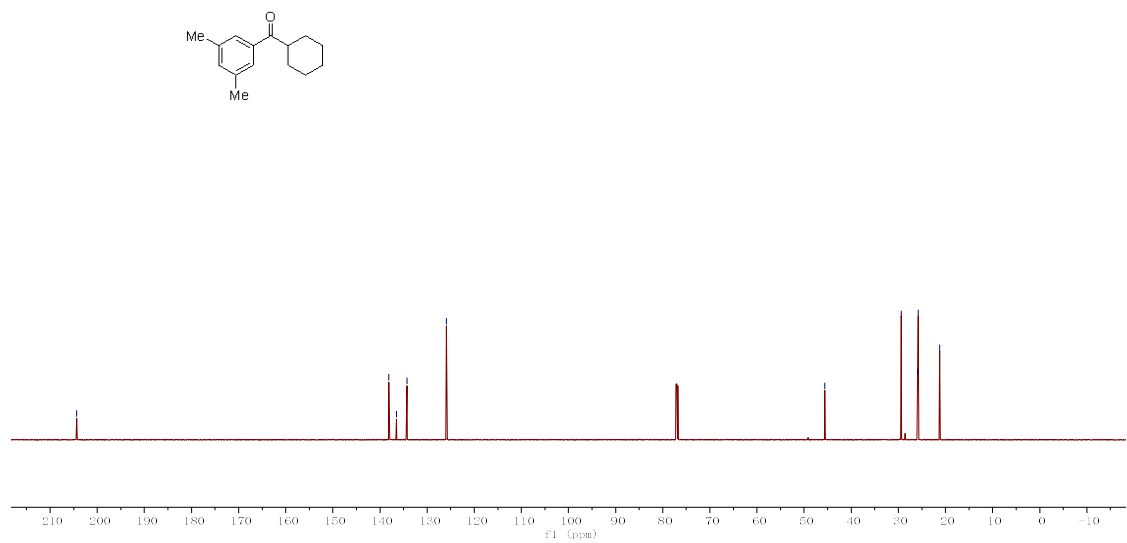

11

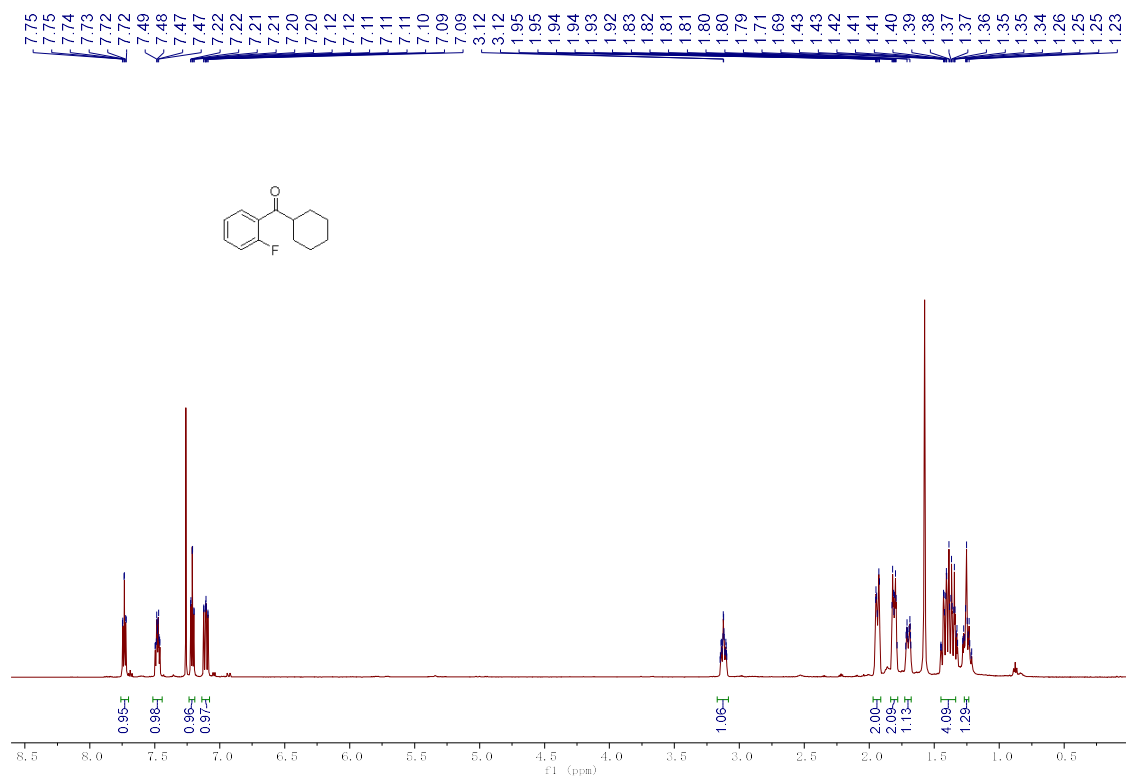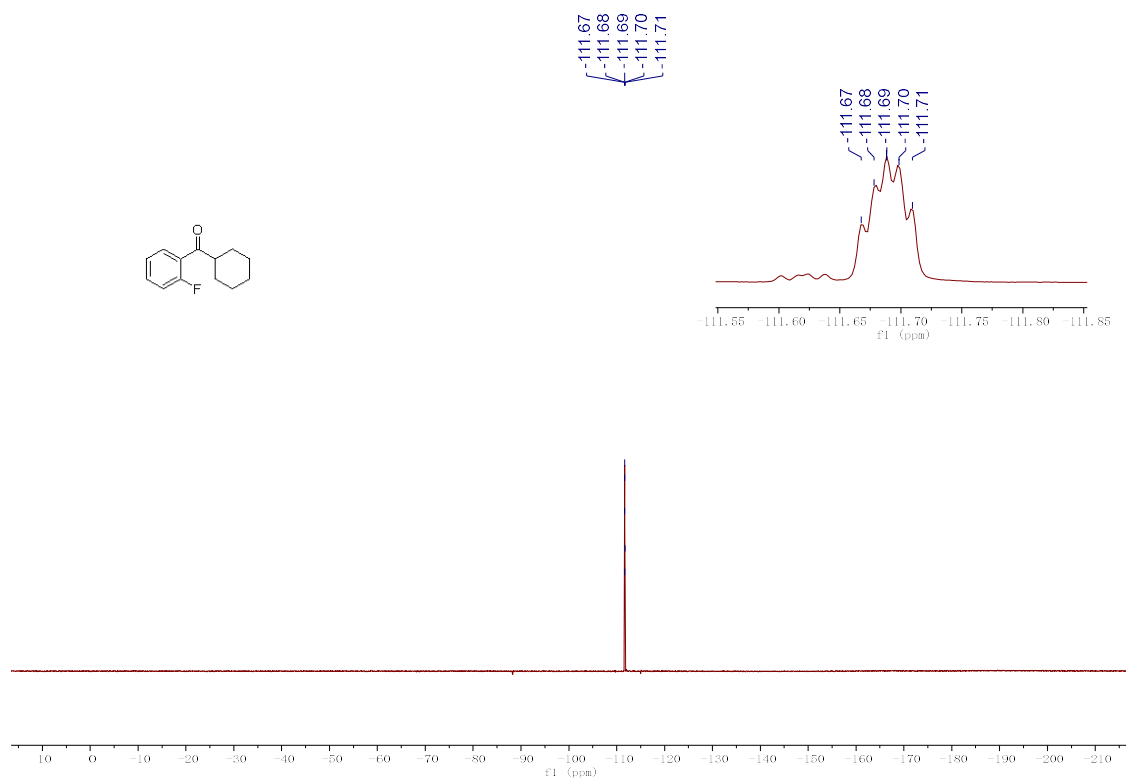



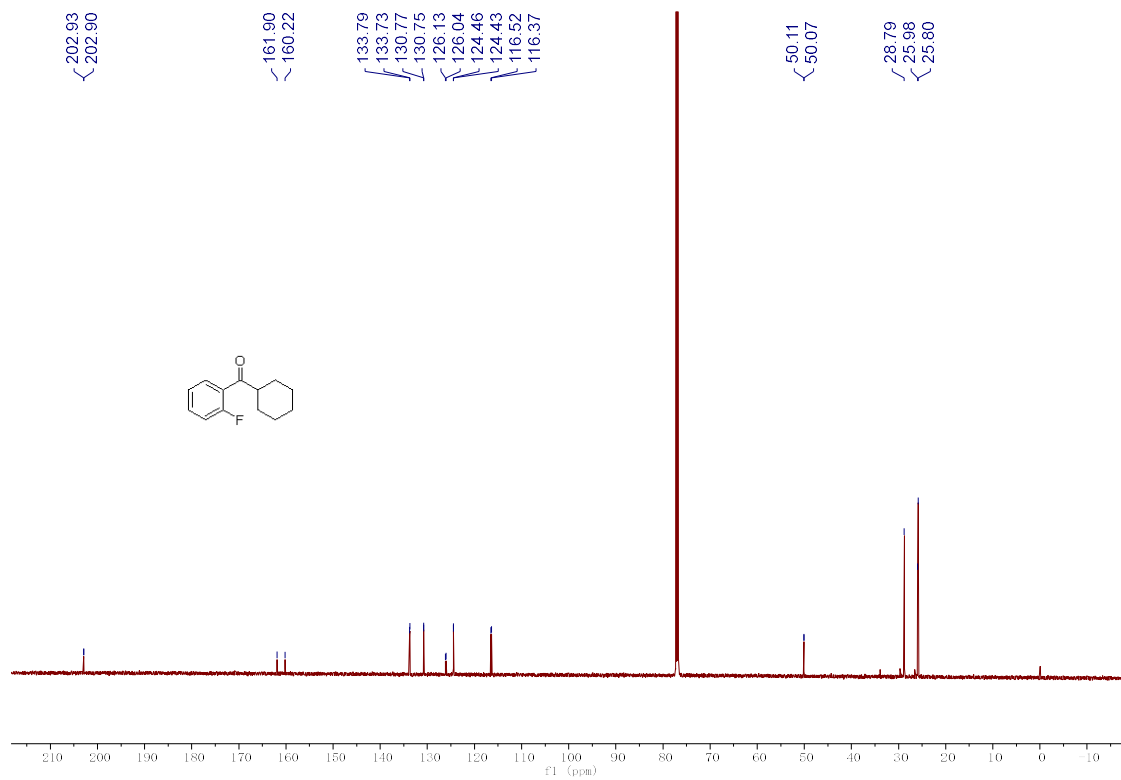

12

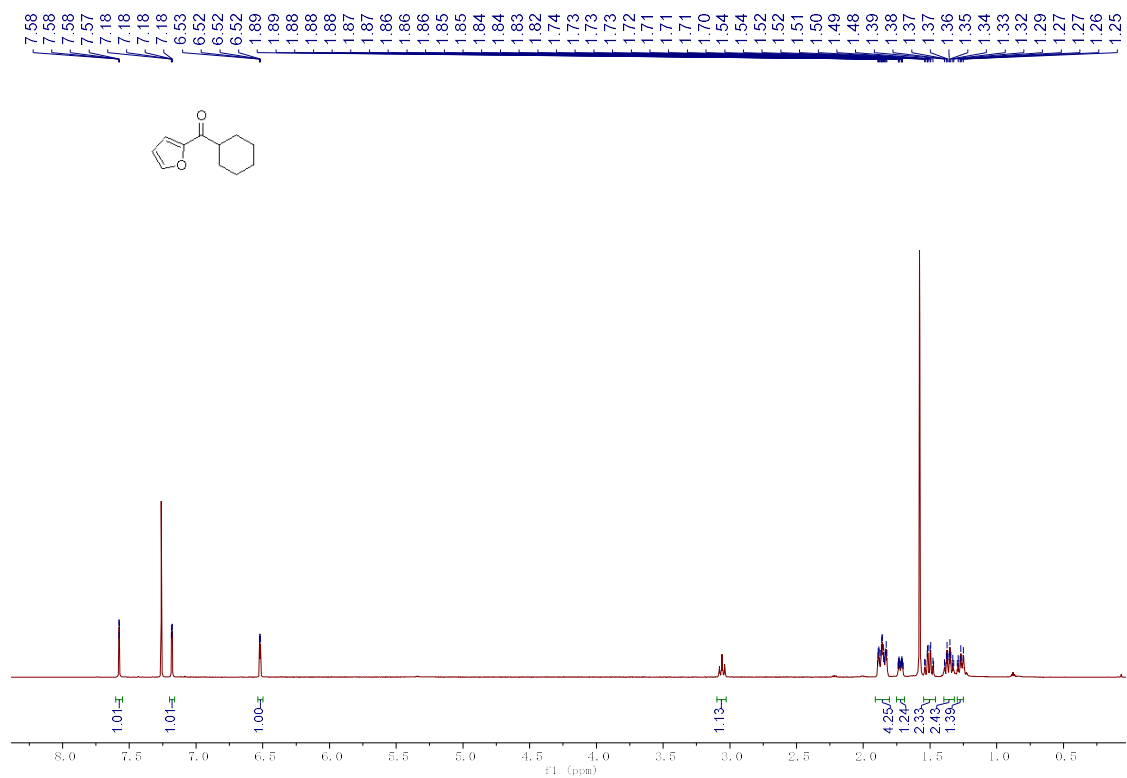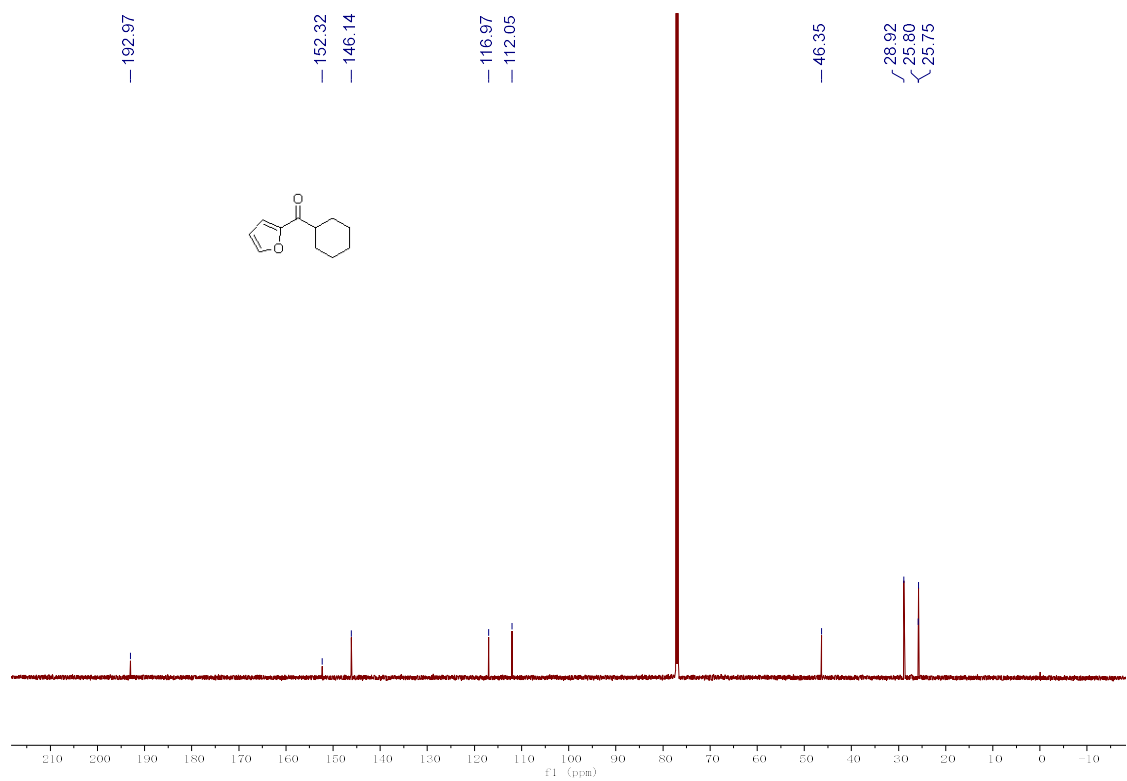

13

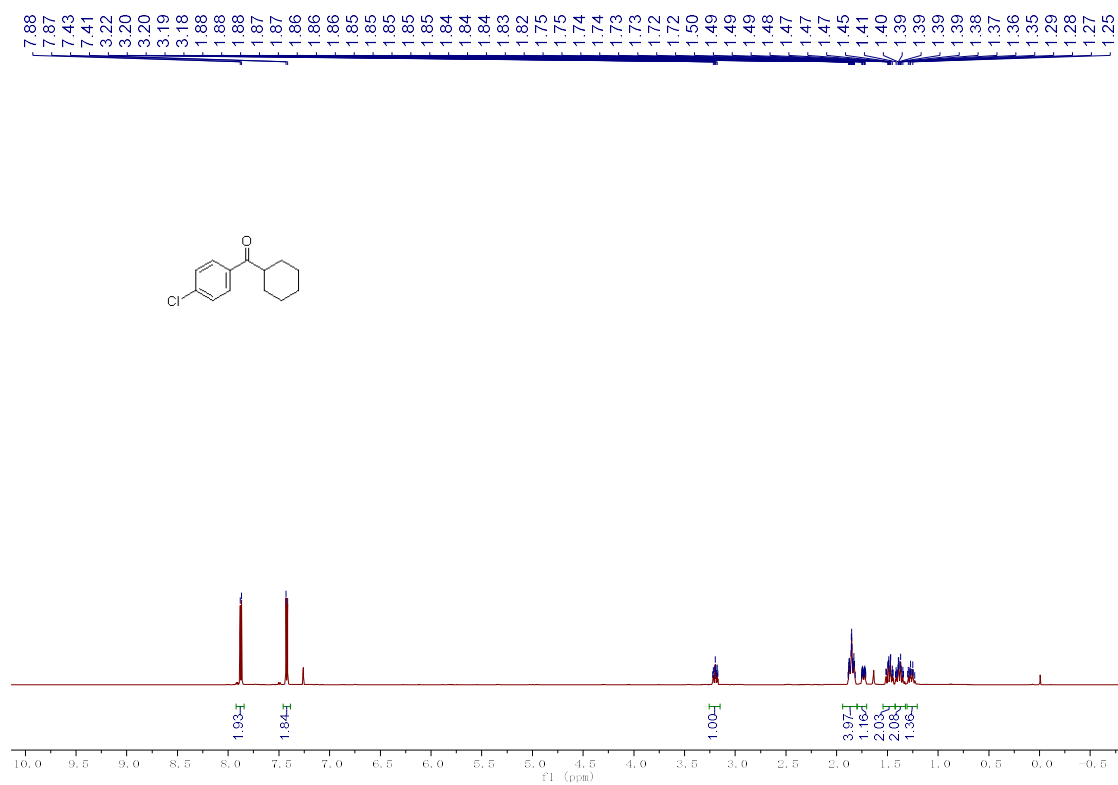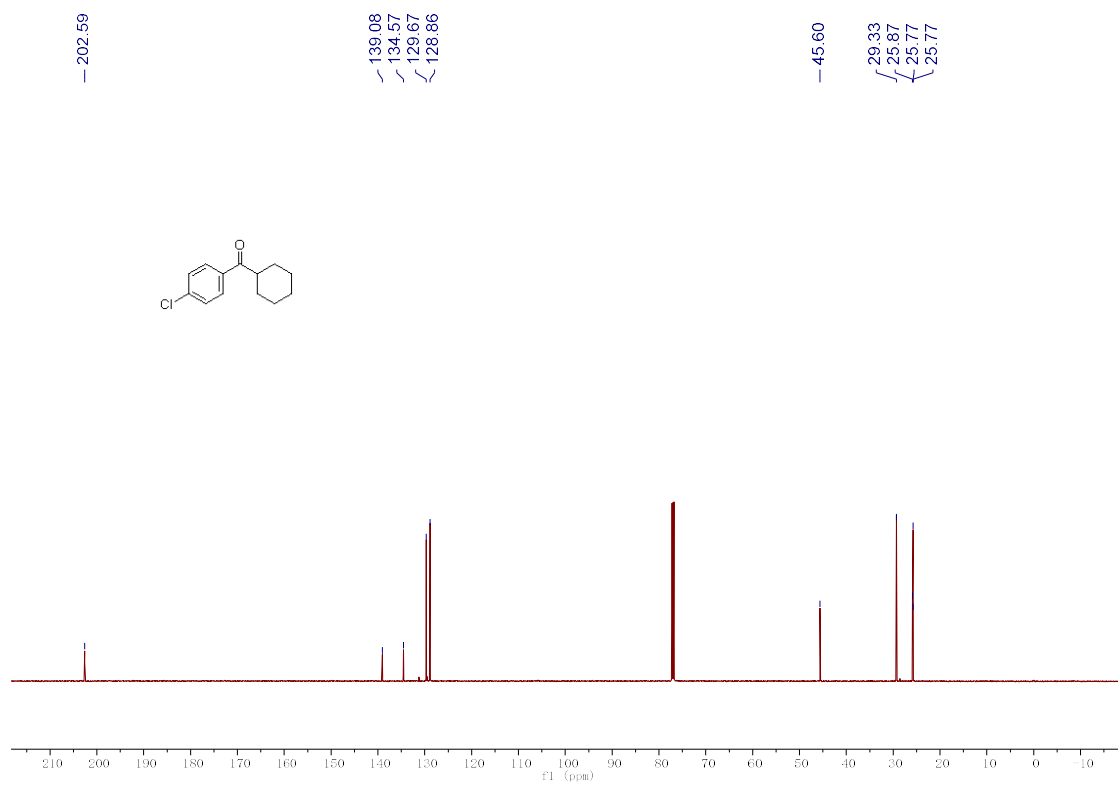

14

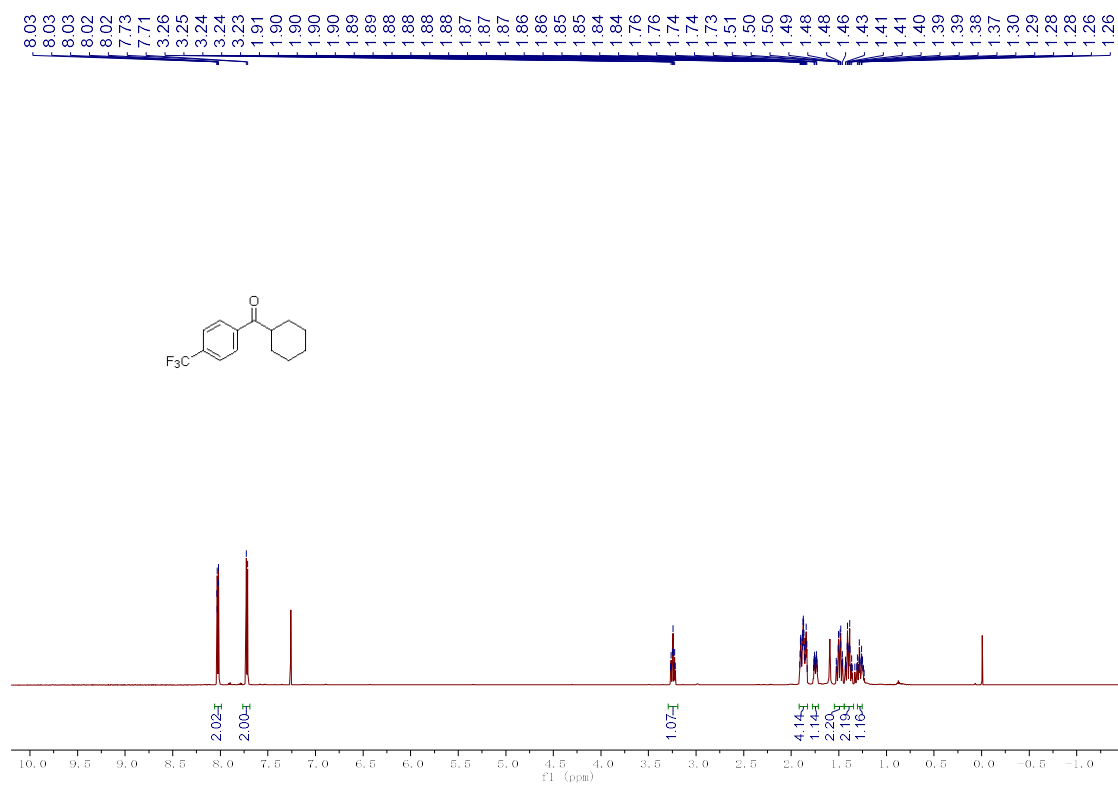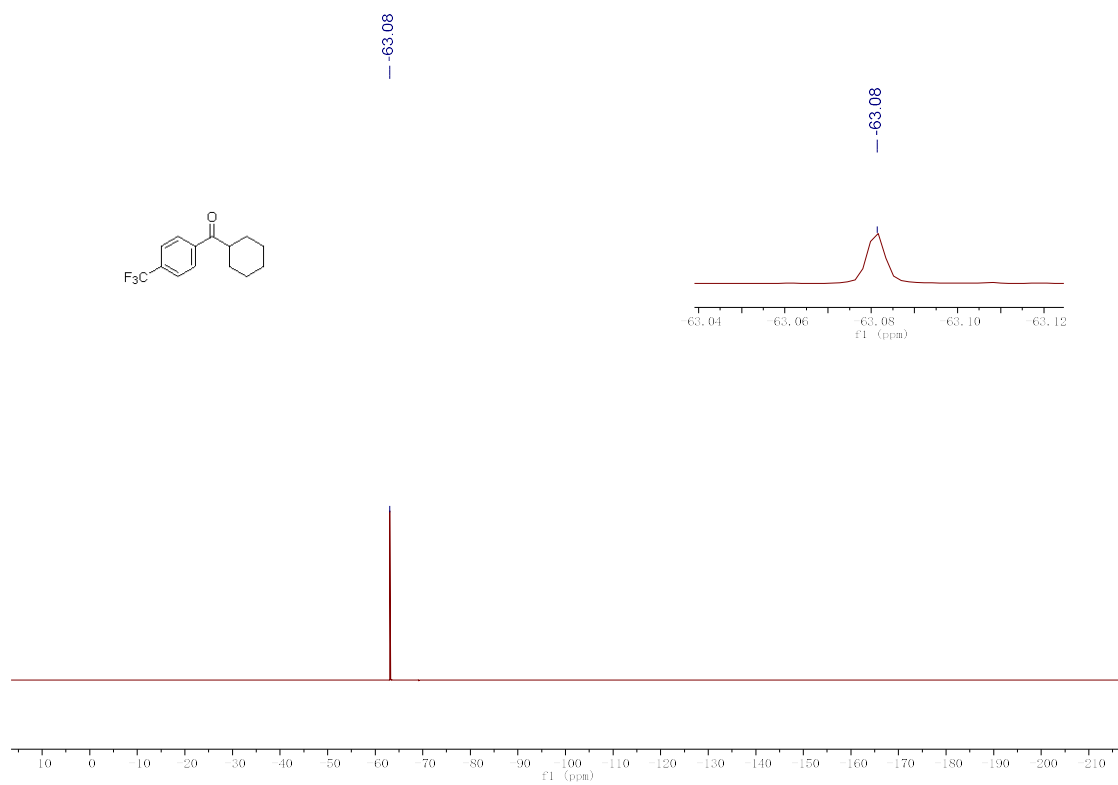

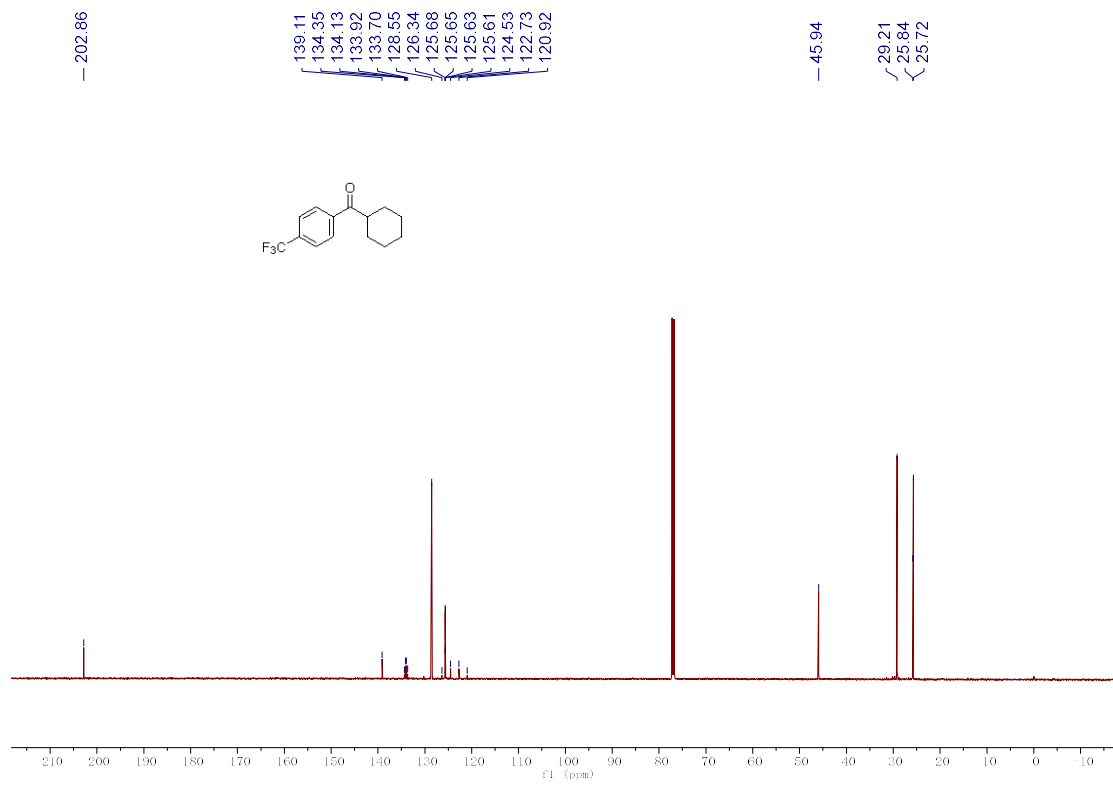

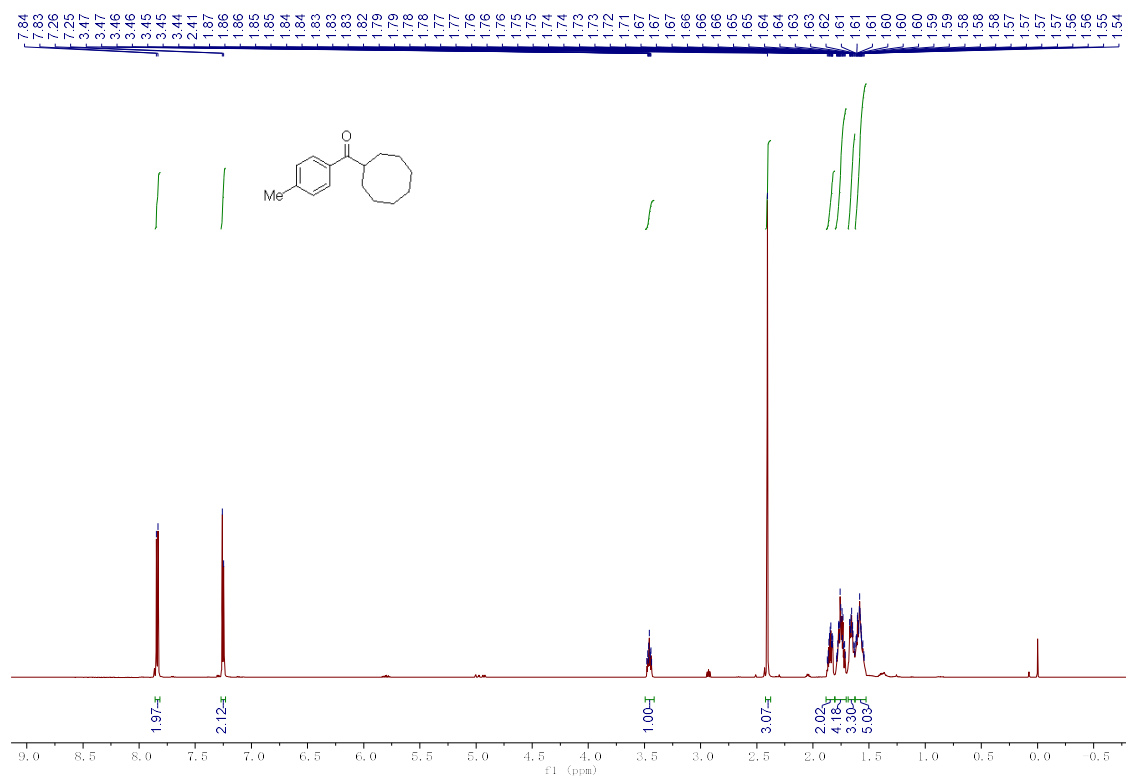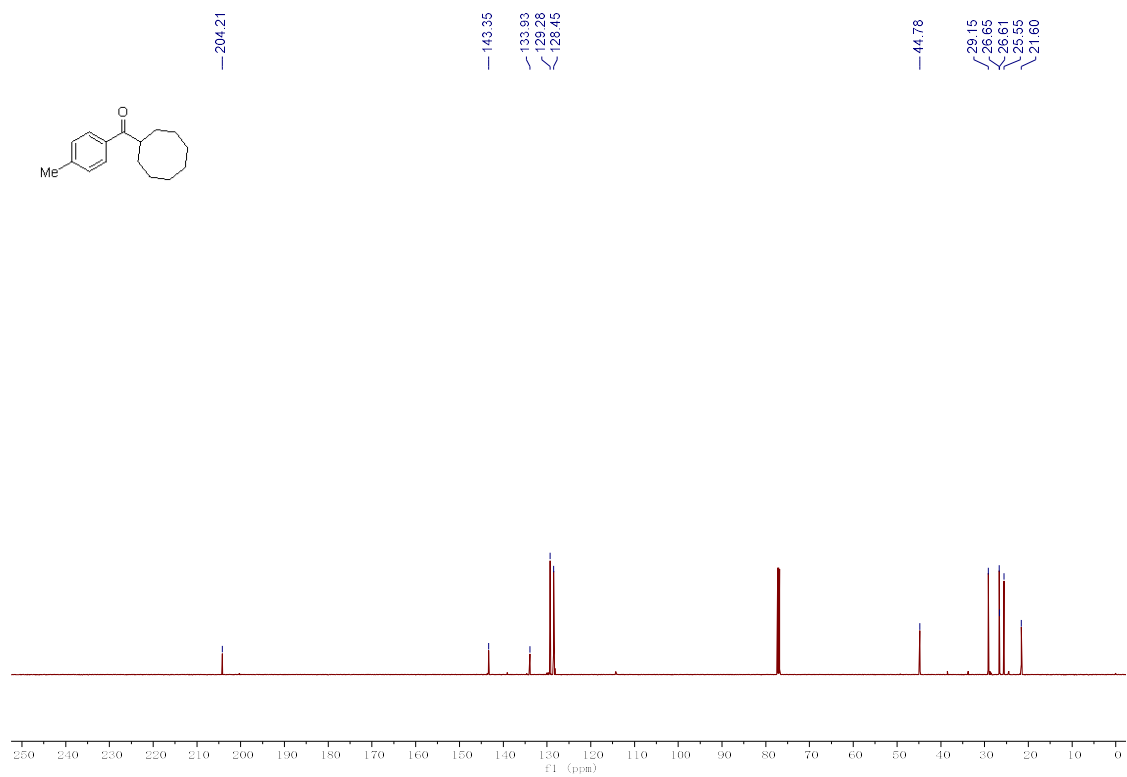

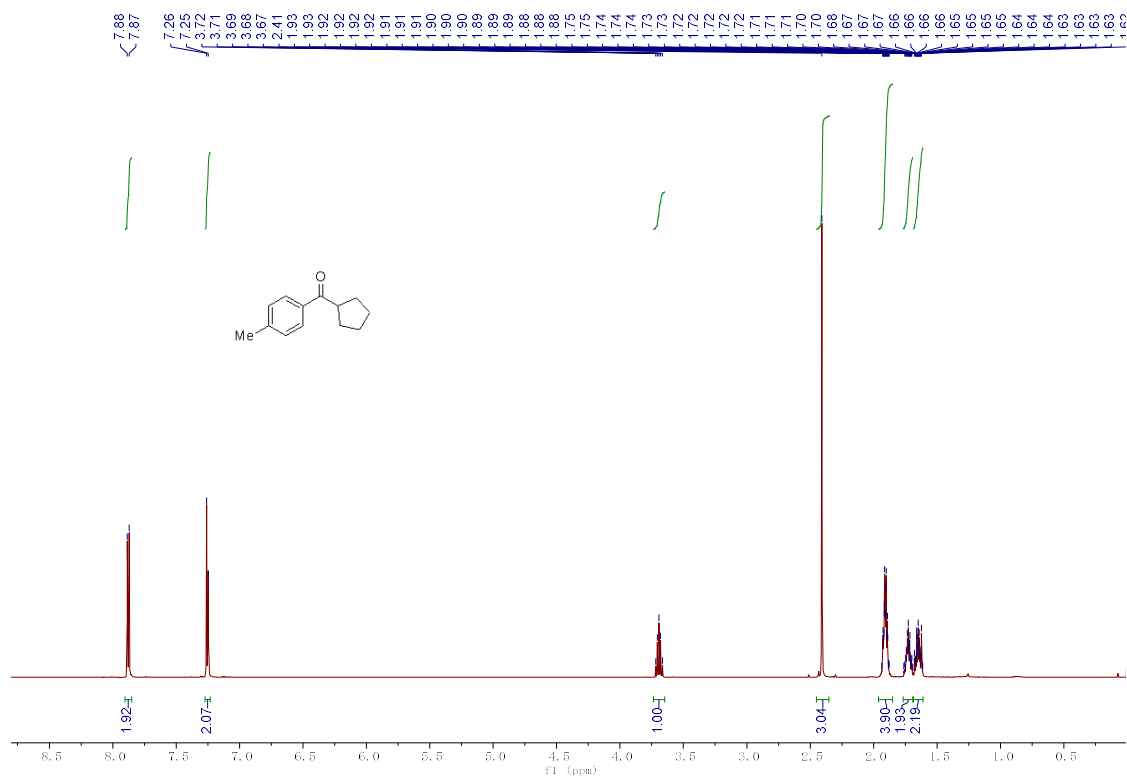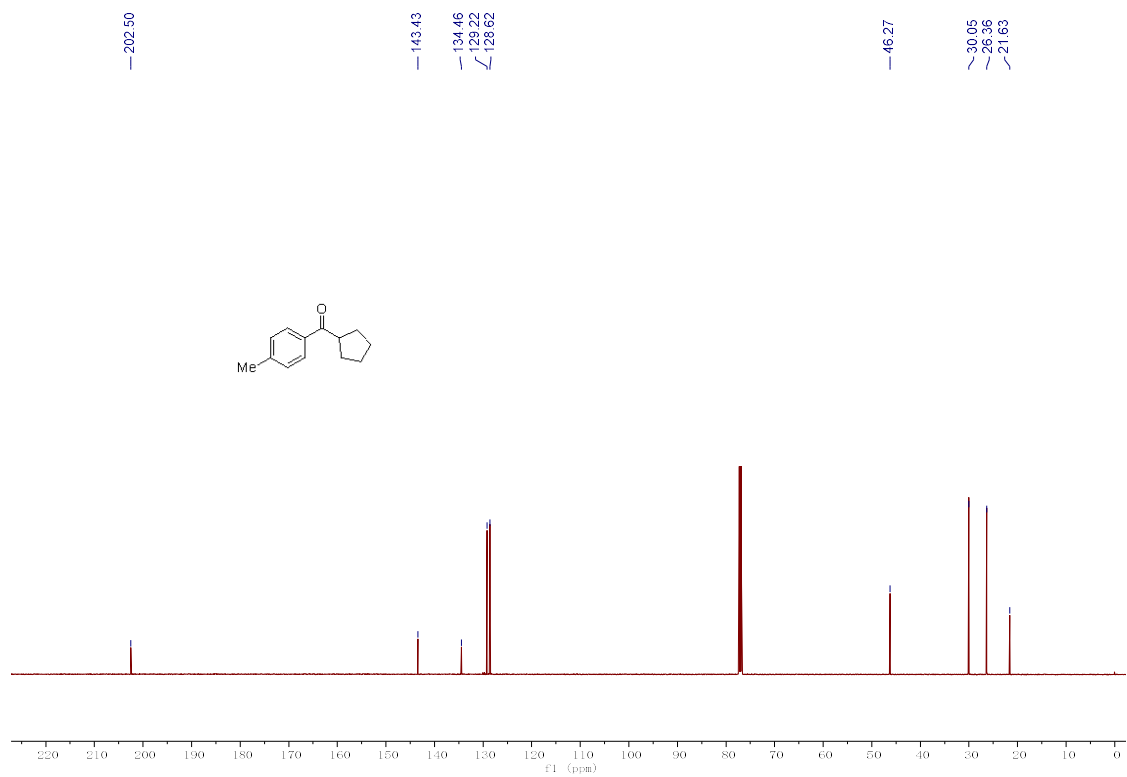

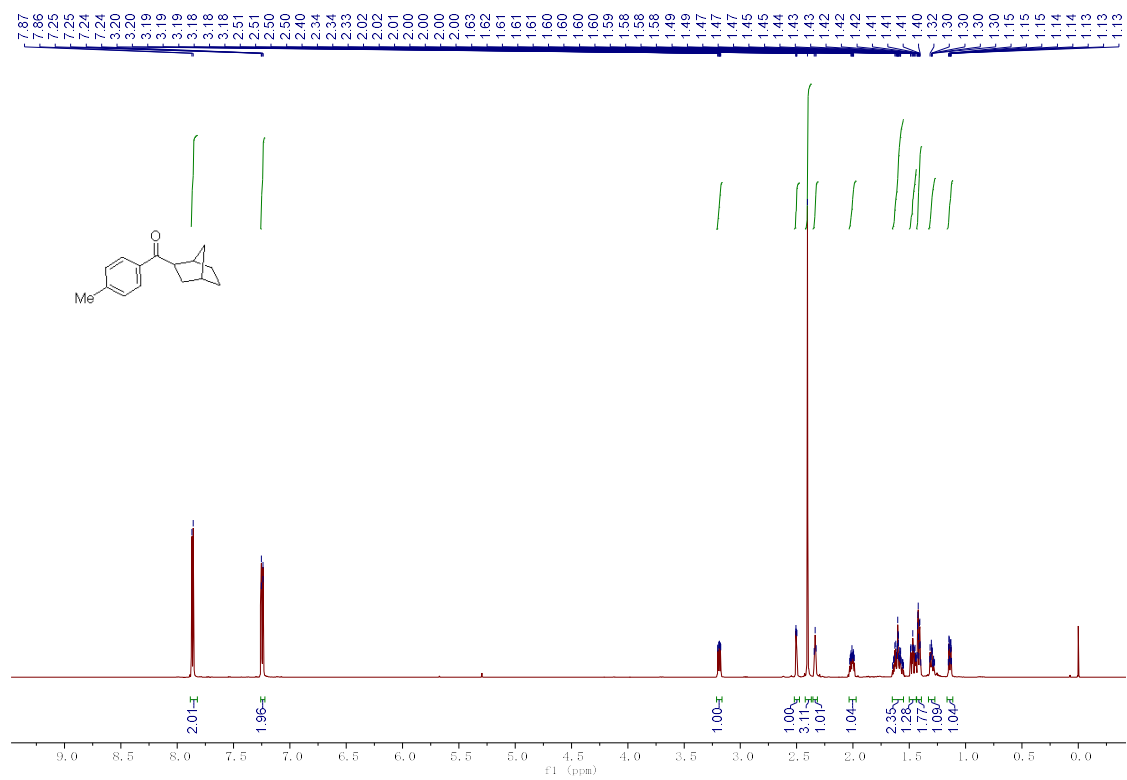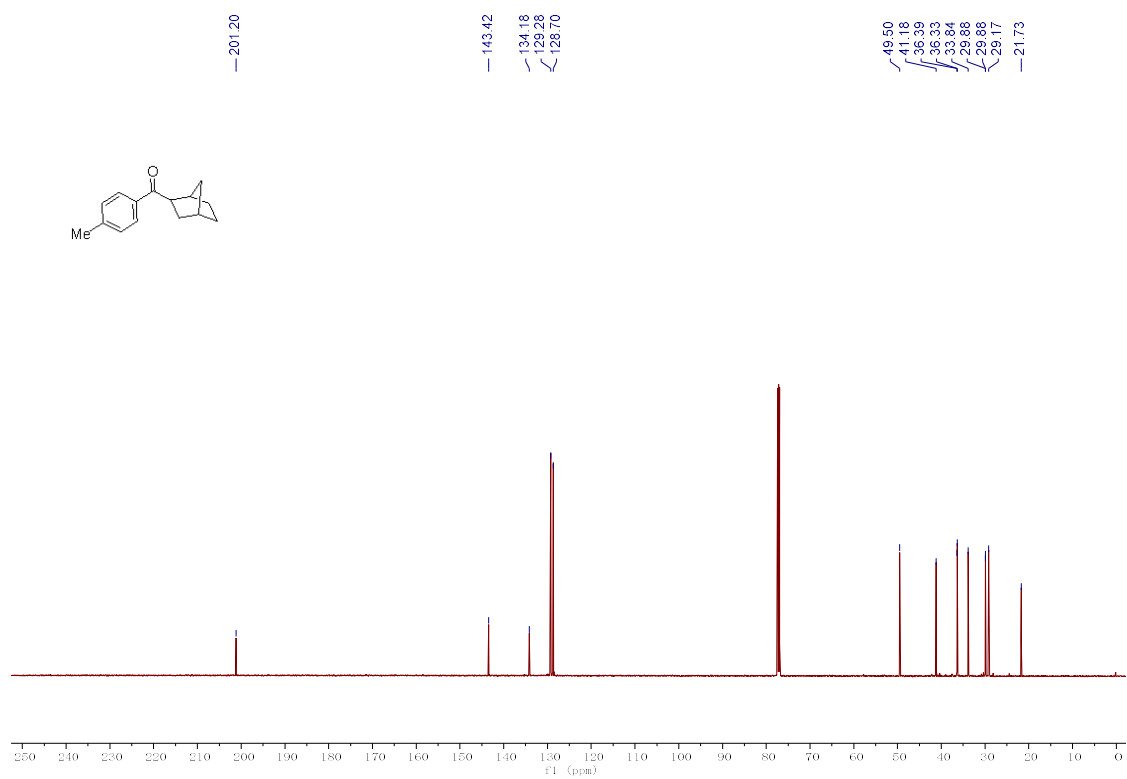



18

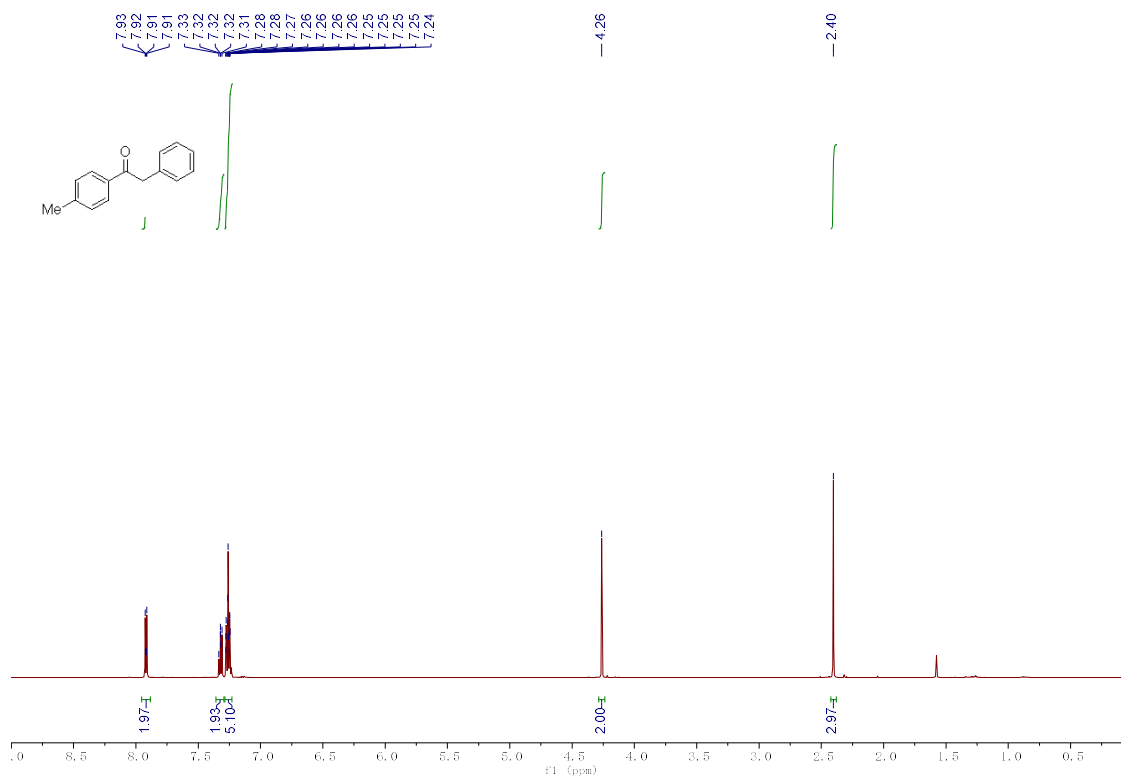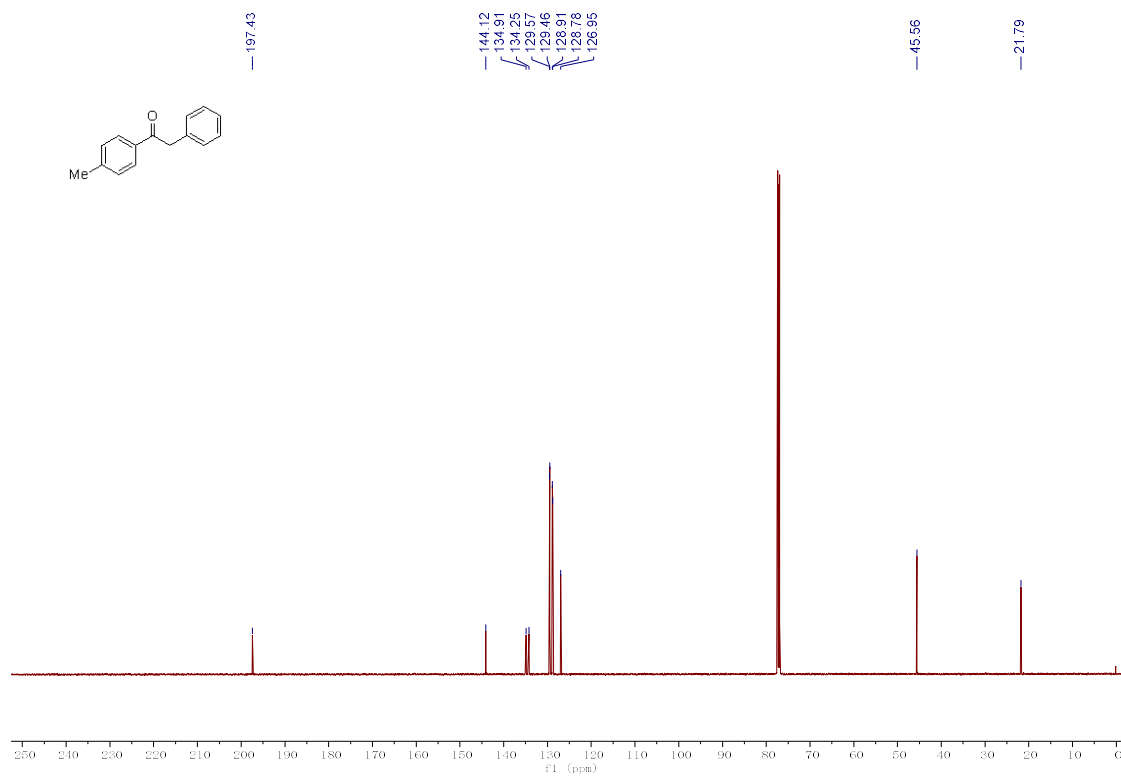

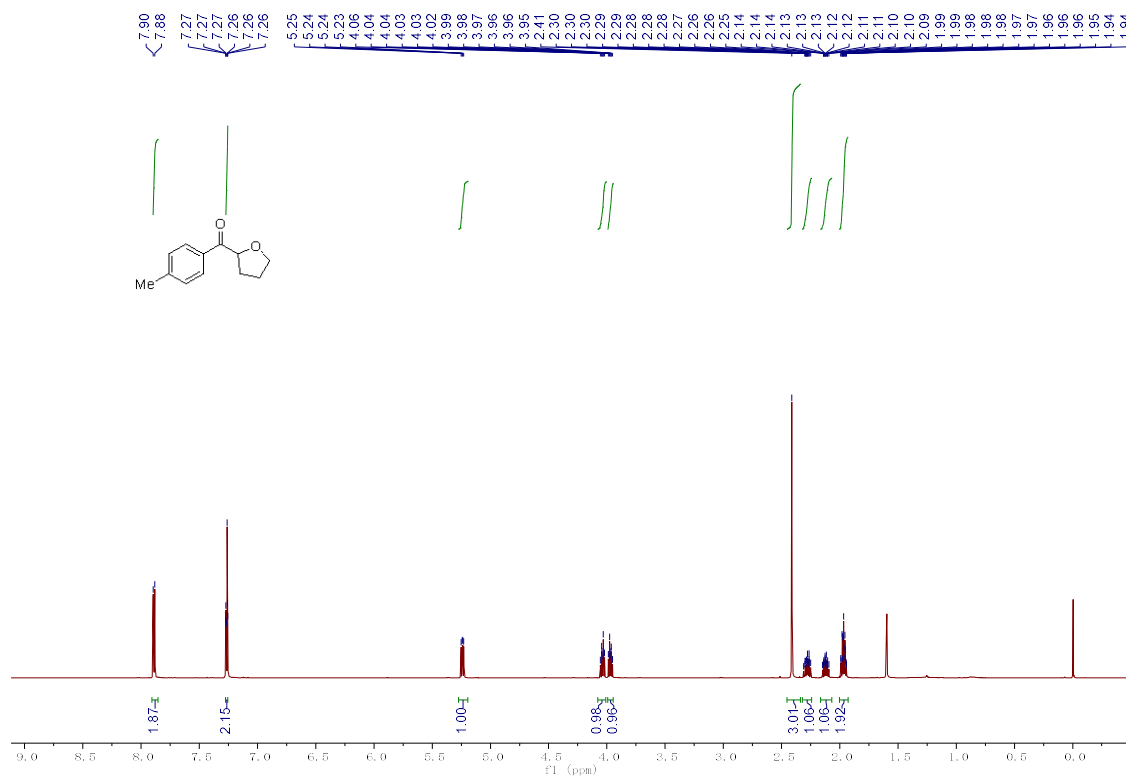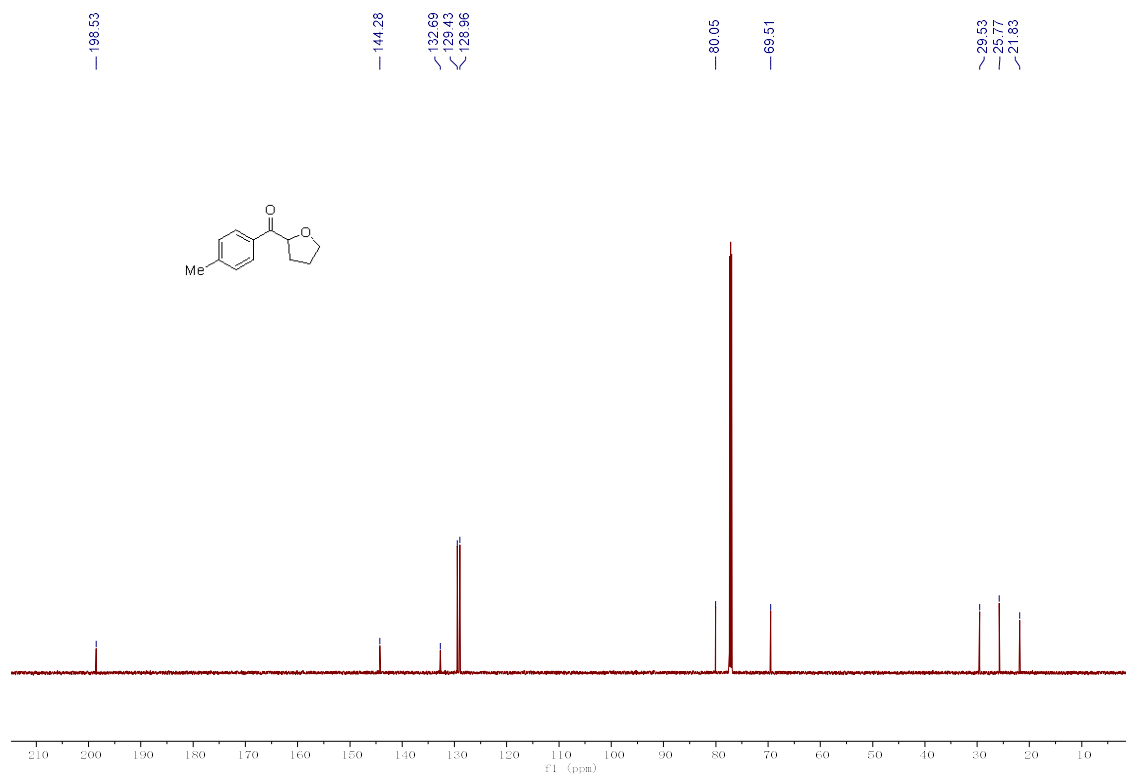

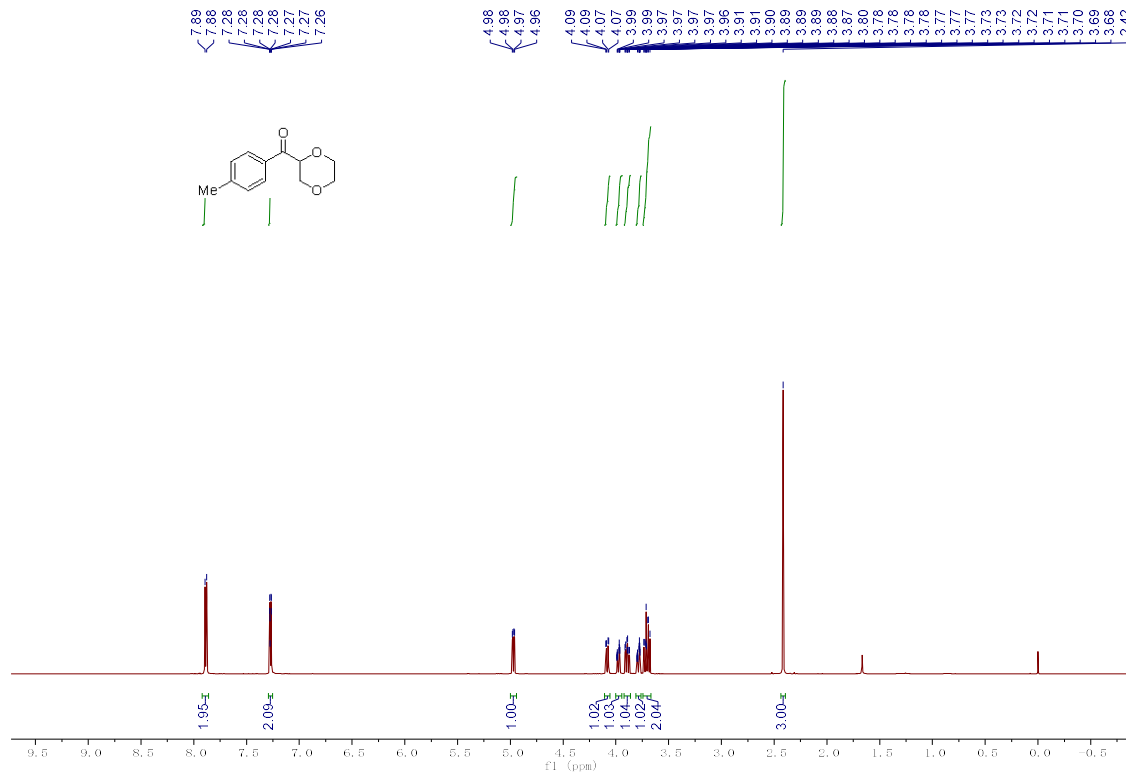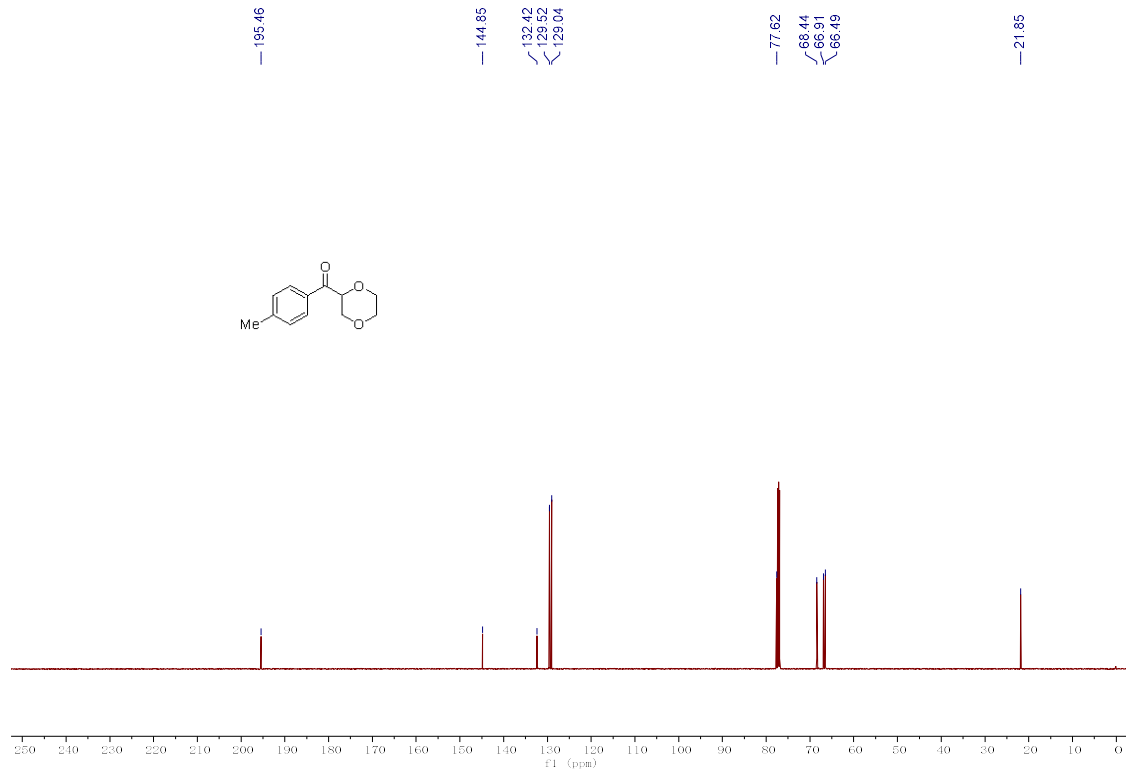

21

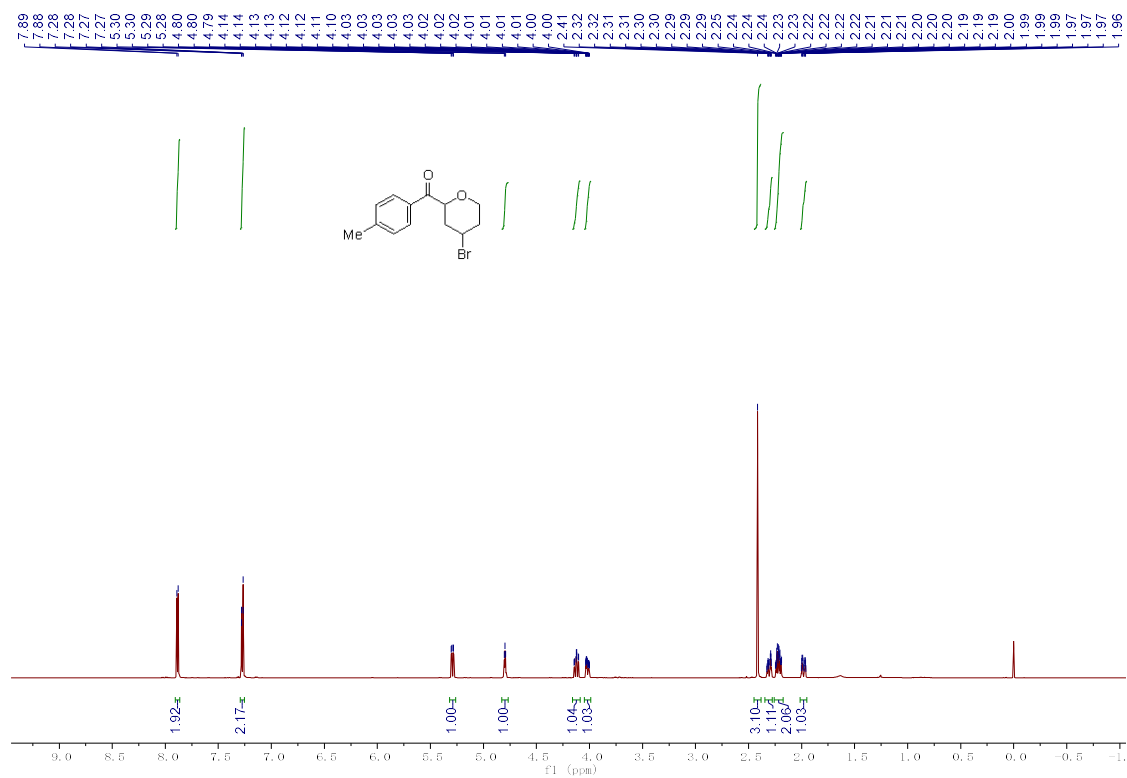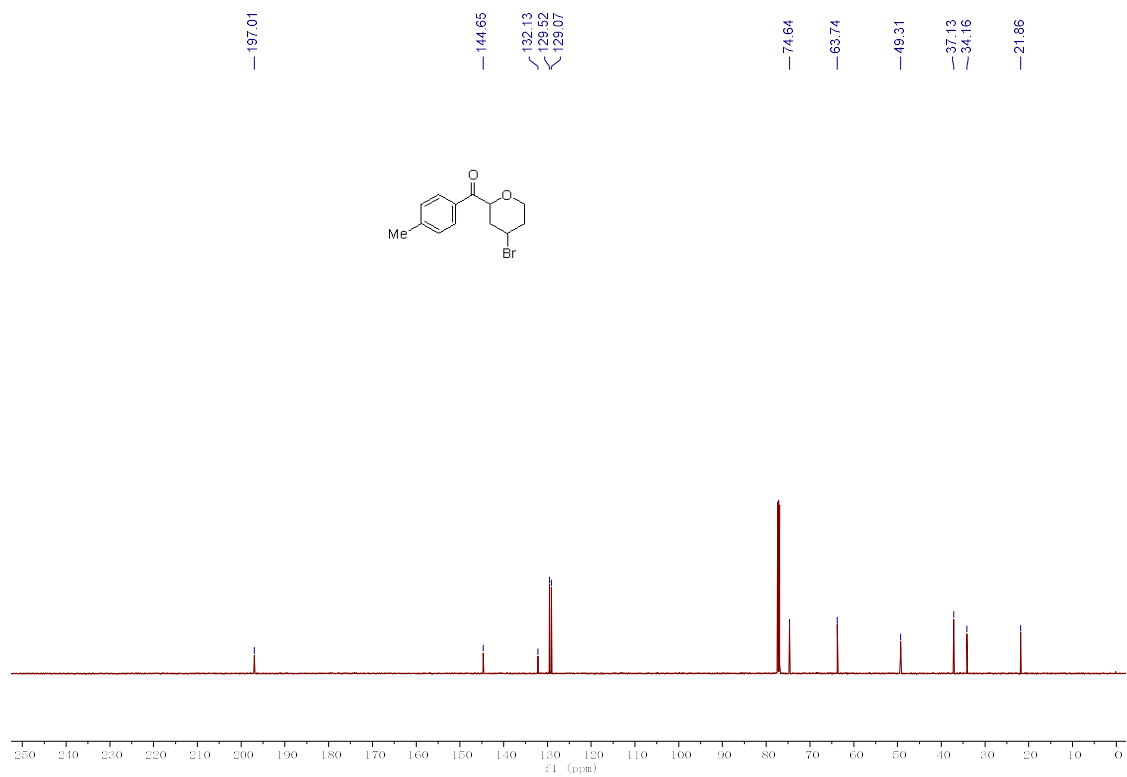

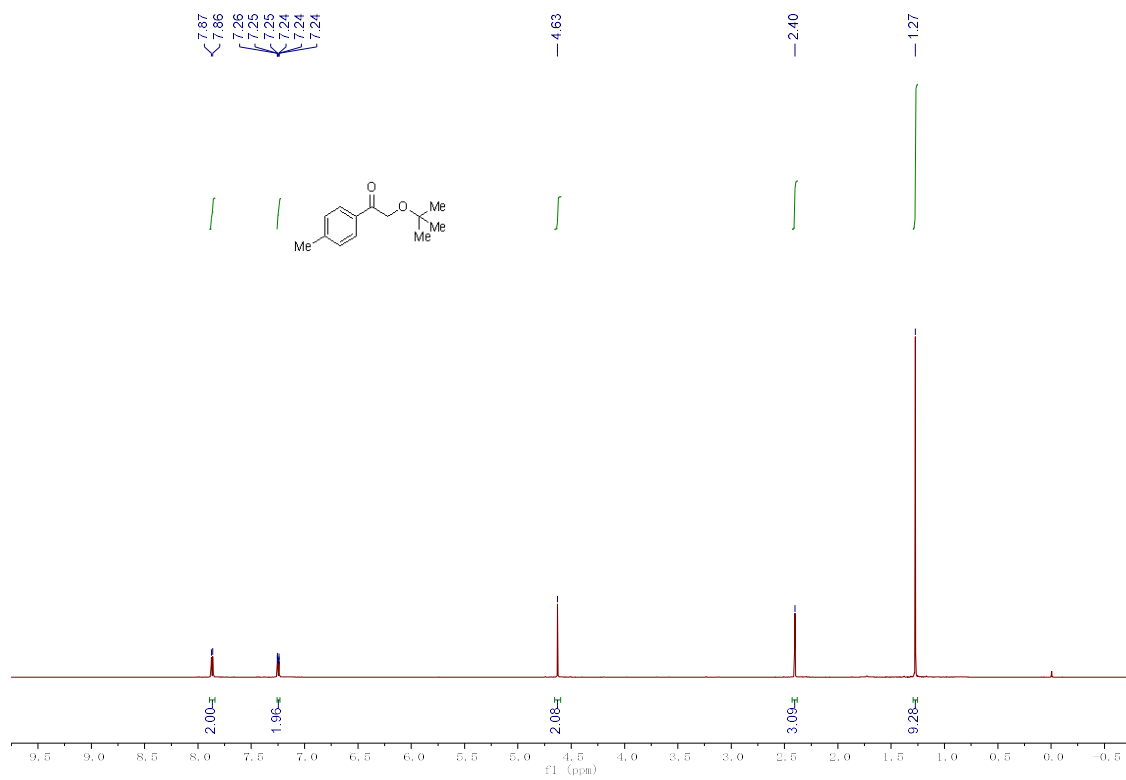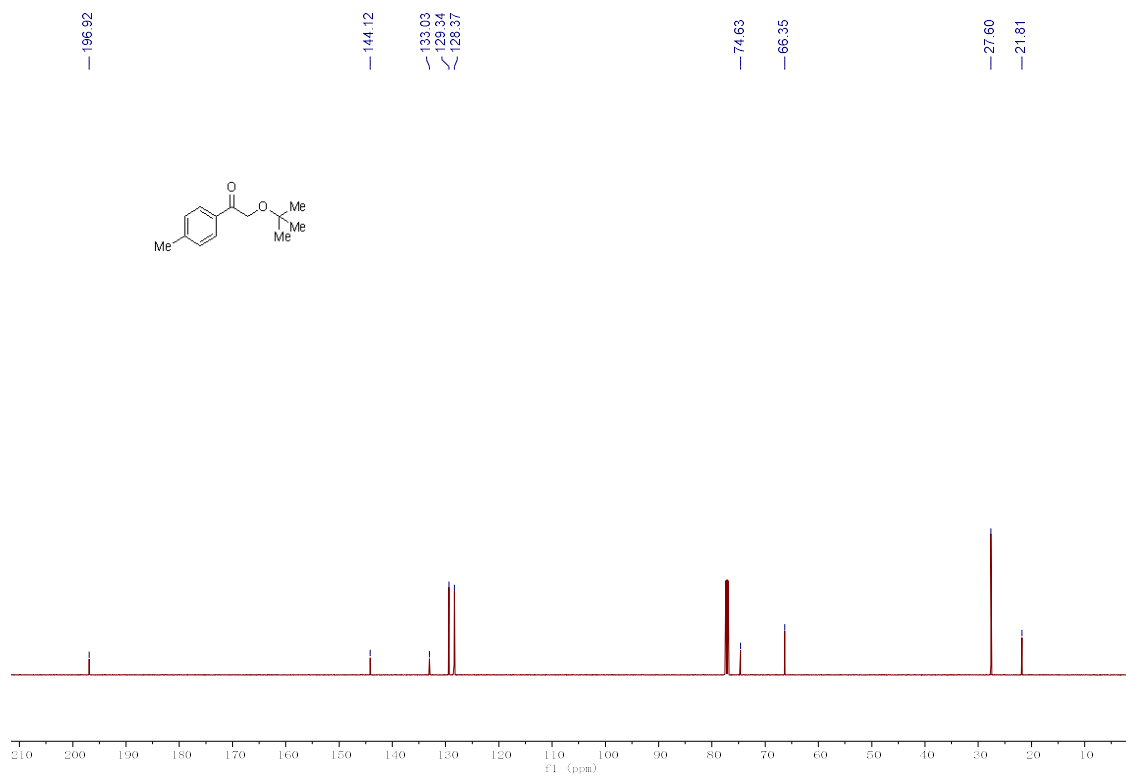

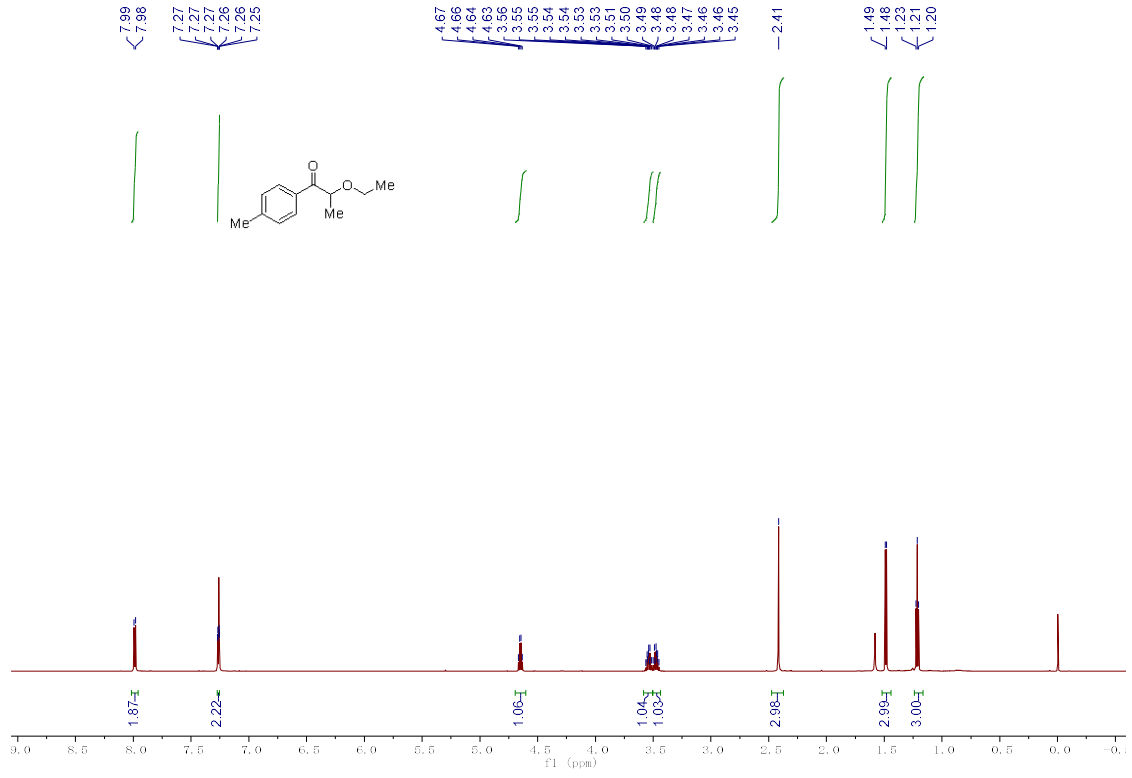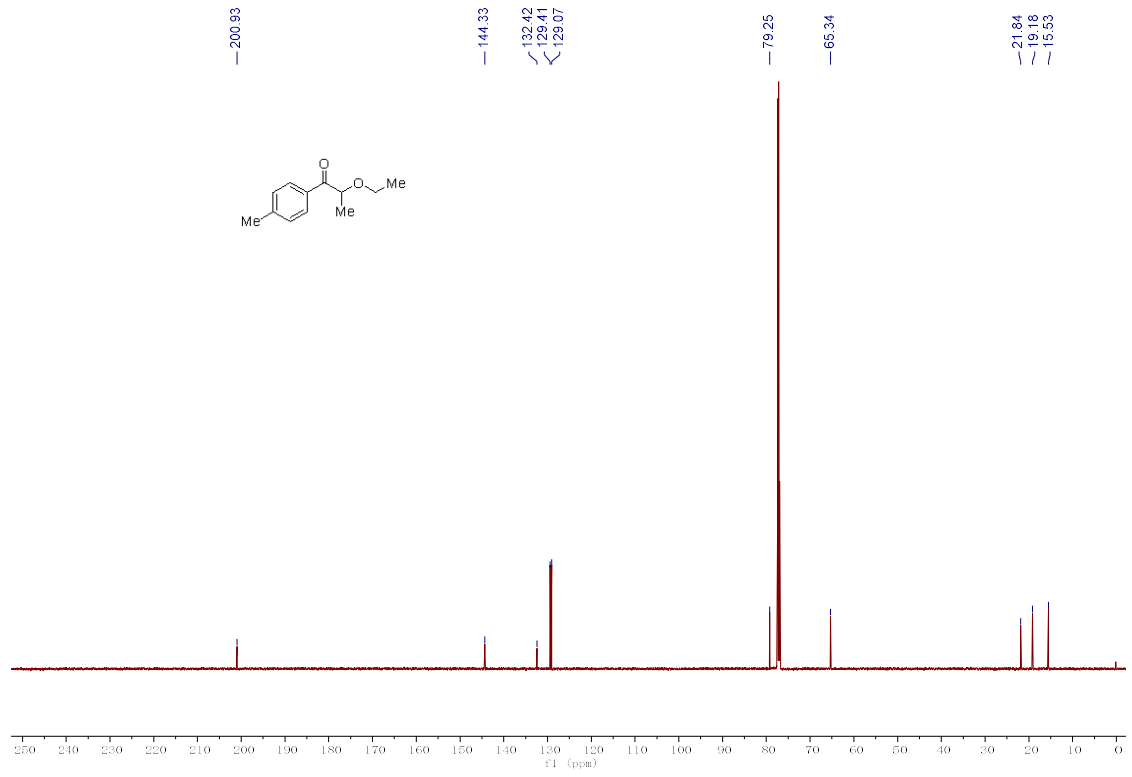

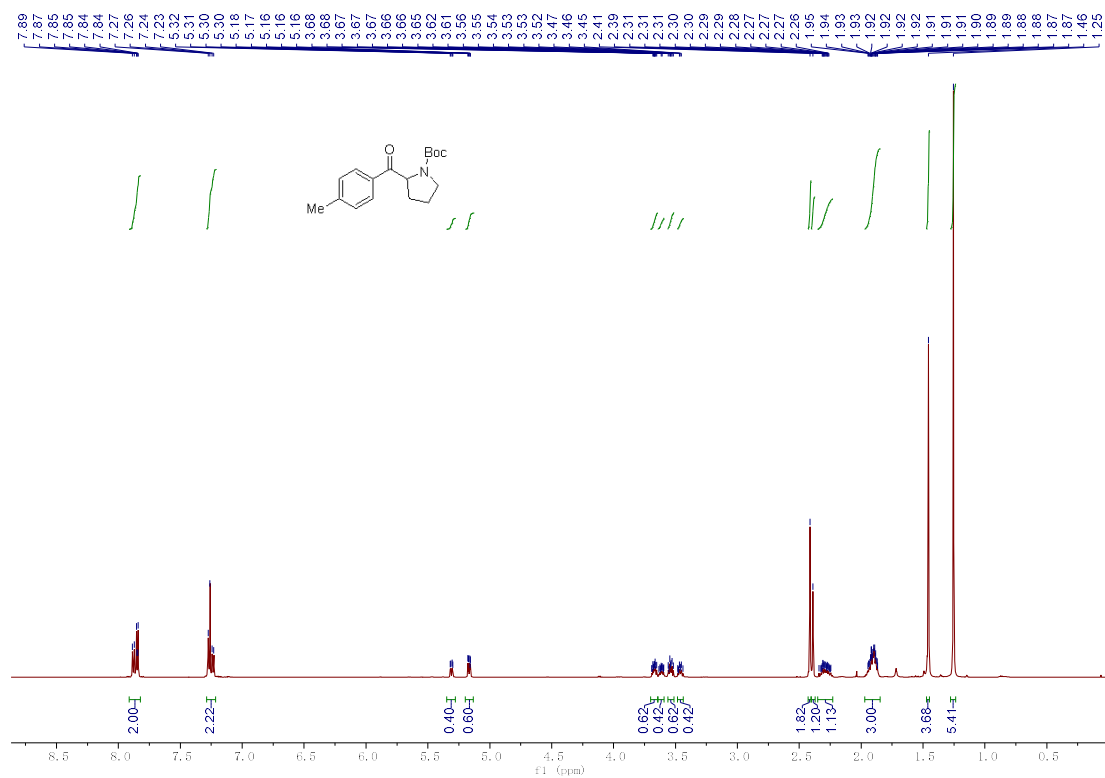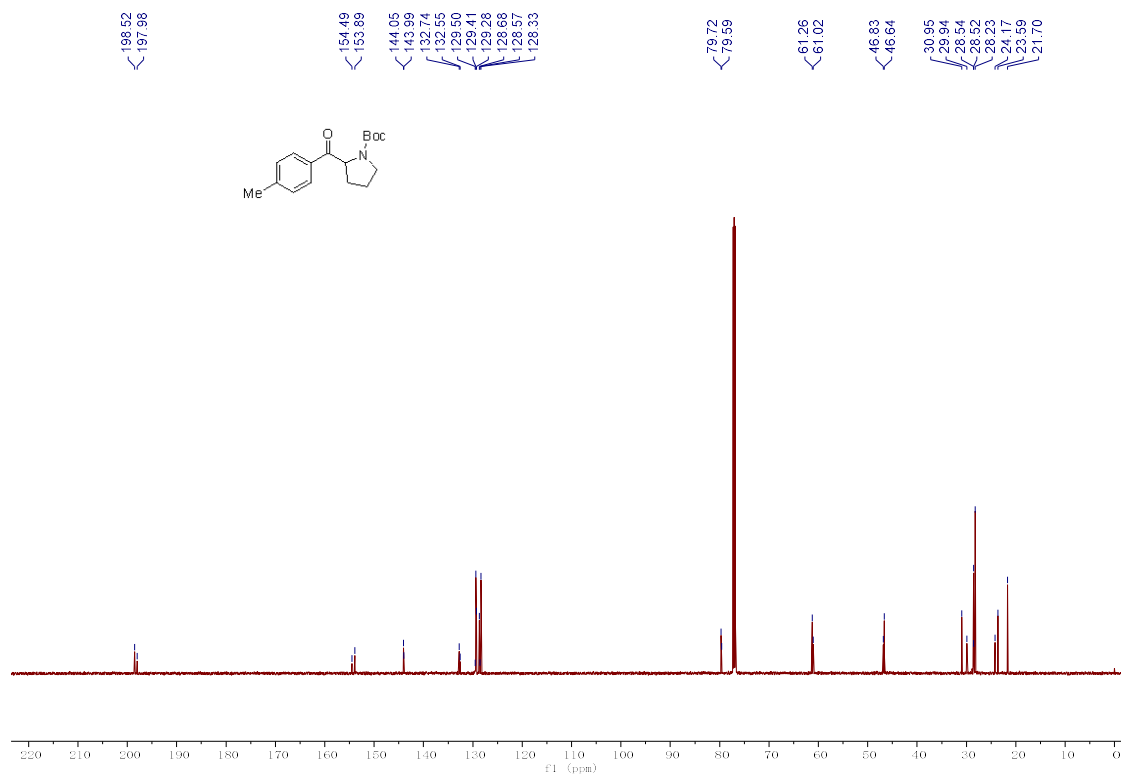

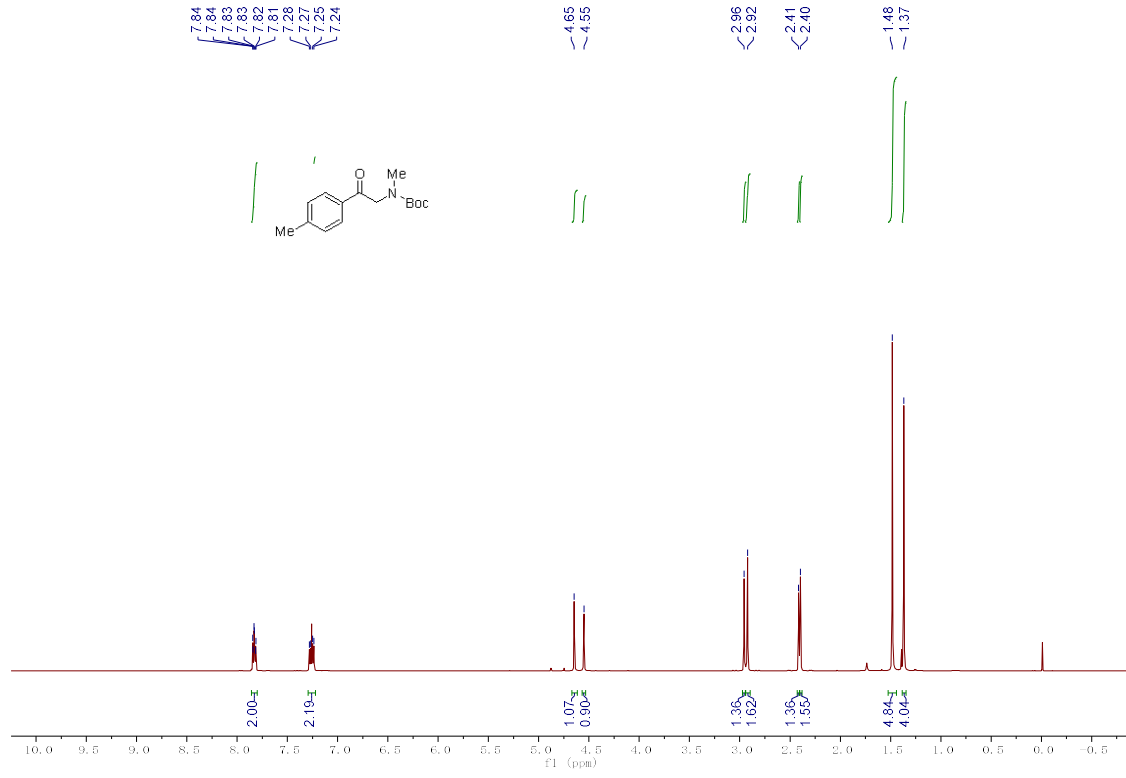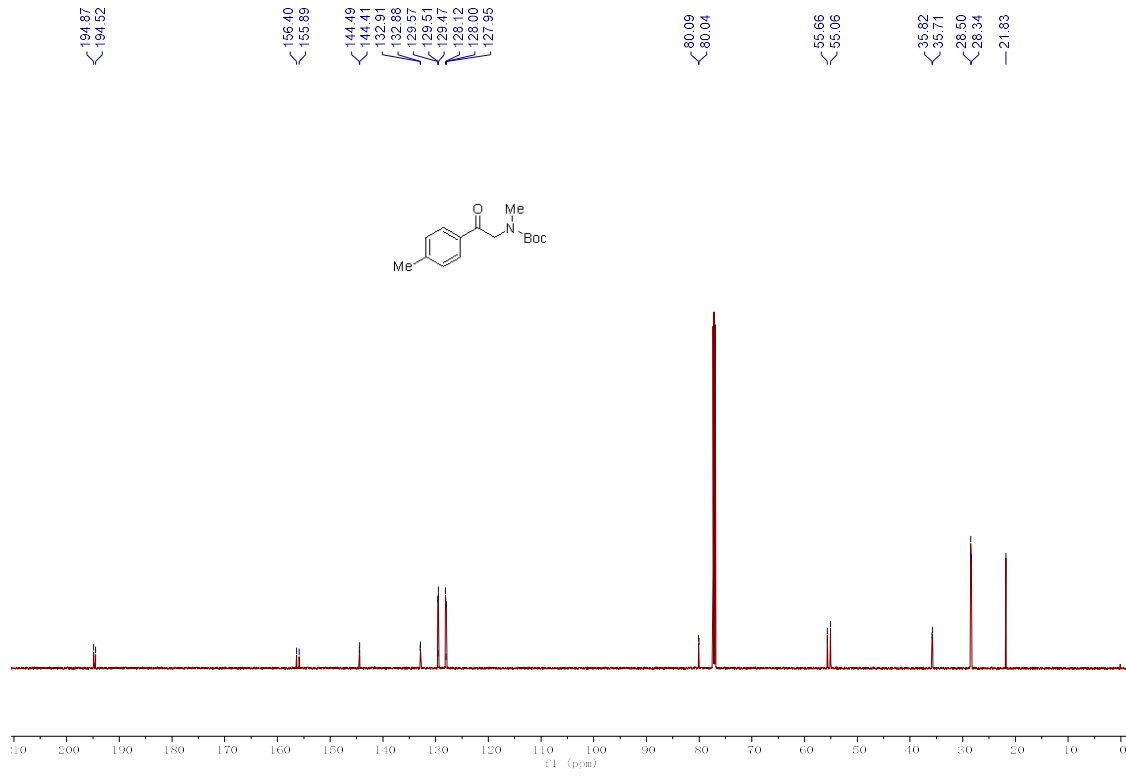



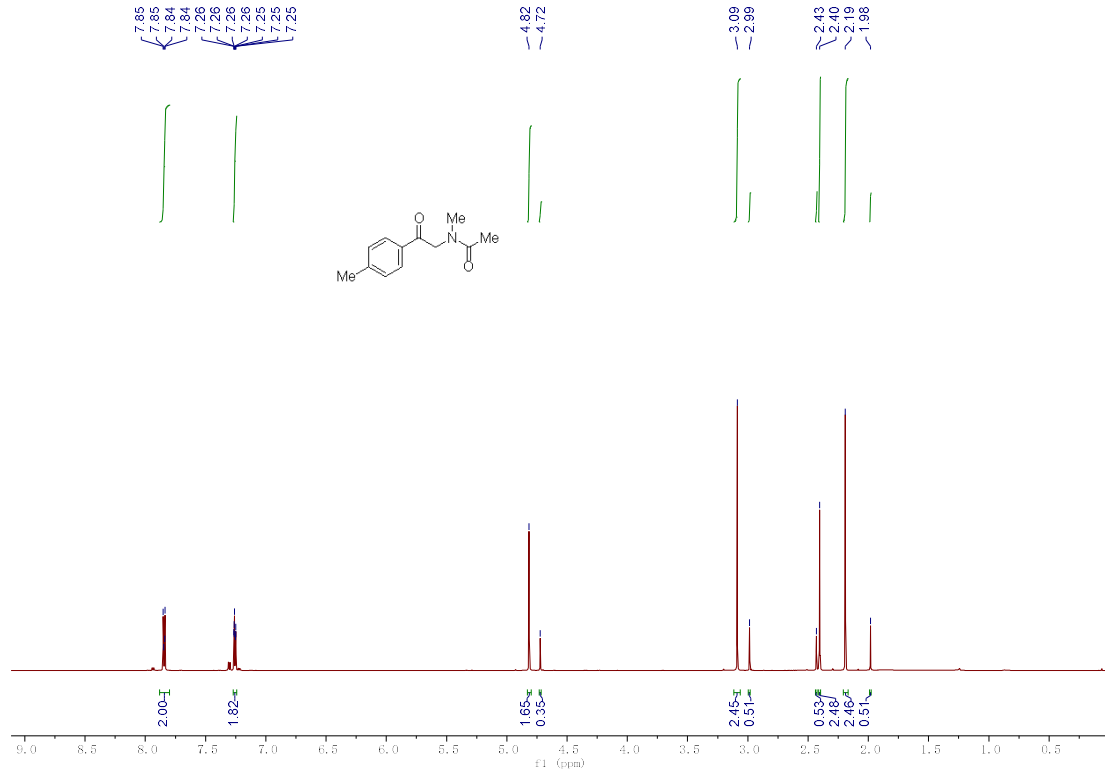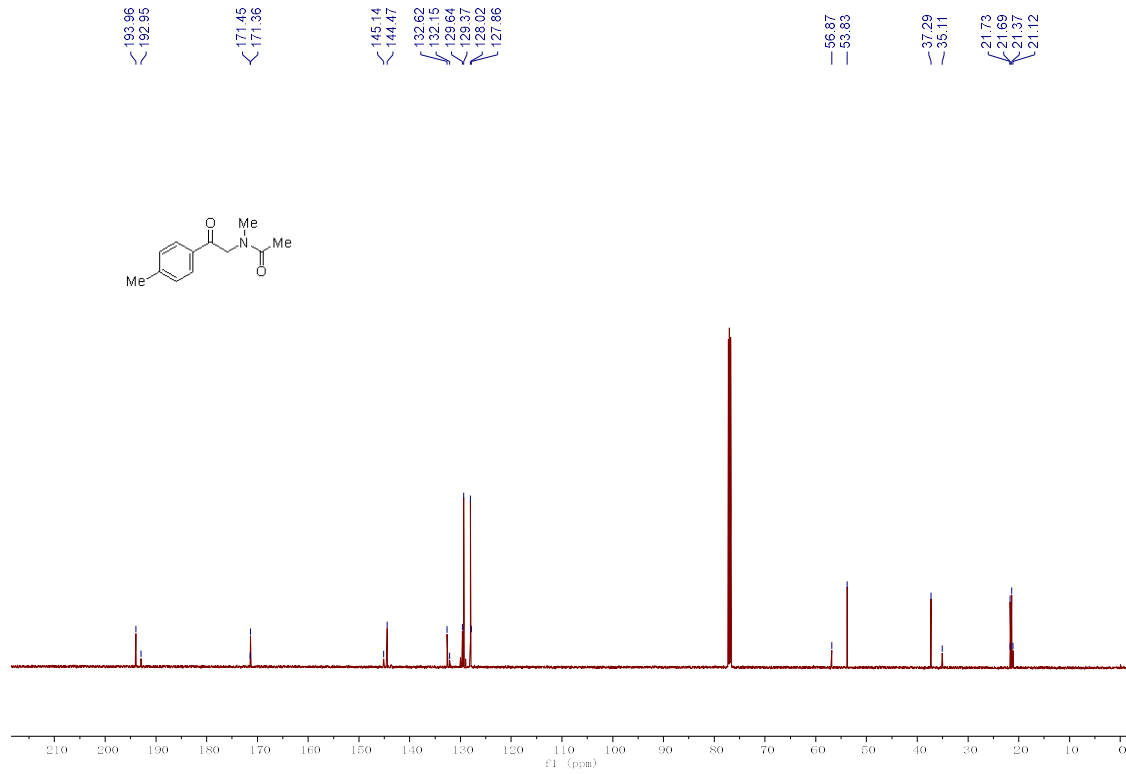

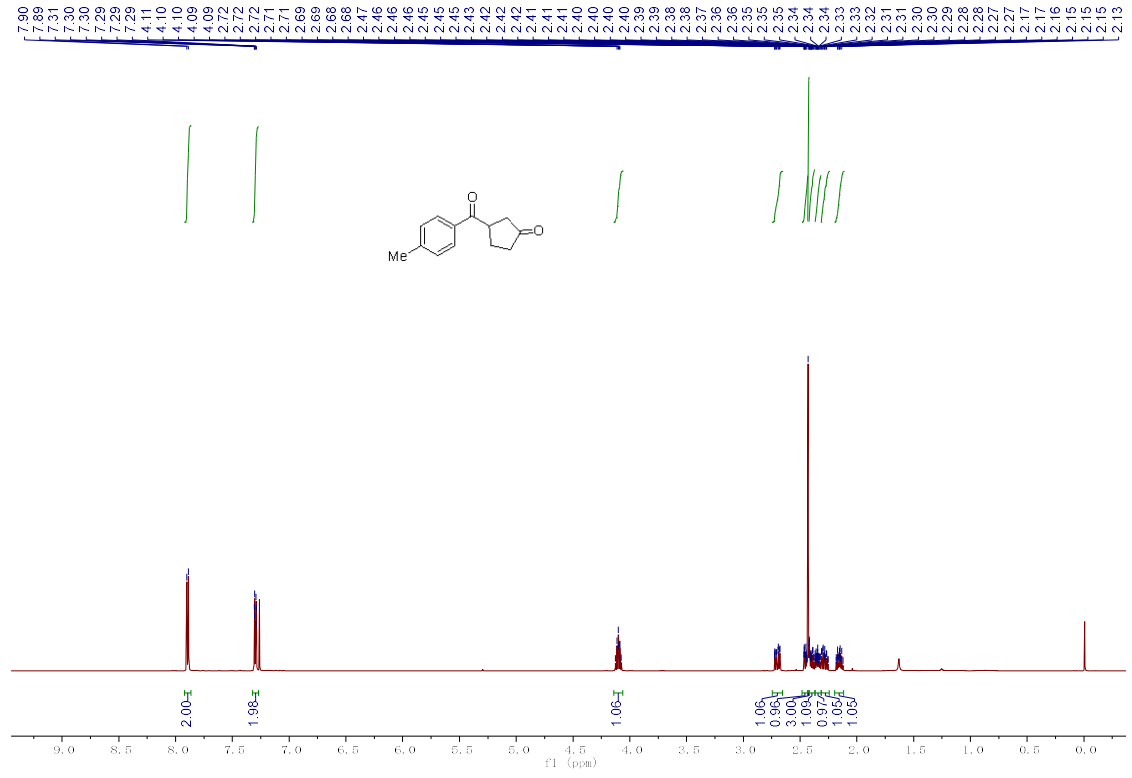

— 217.13

— 199.86

— 144.52

— 133.13

— 129.59

— 128.61

— 42.95

— 41.08

— 37.42

— 27.09

— 21.72

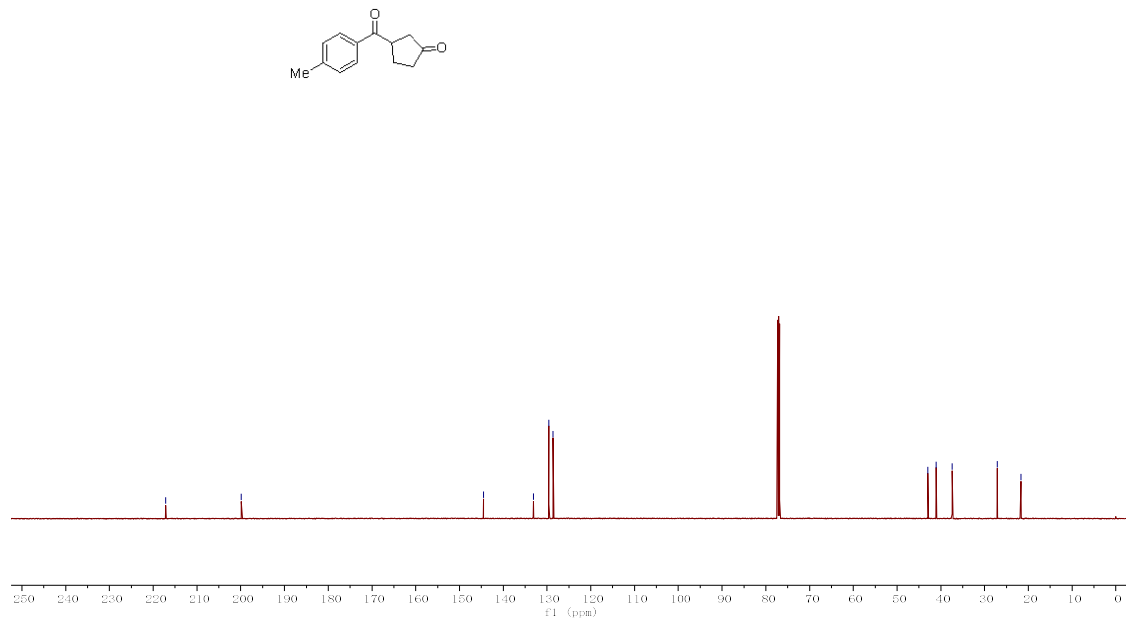

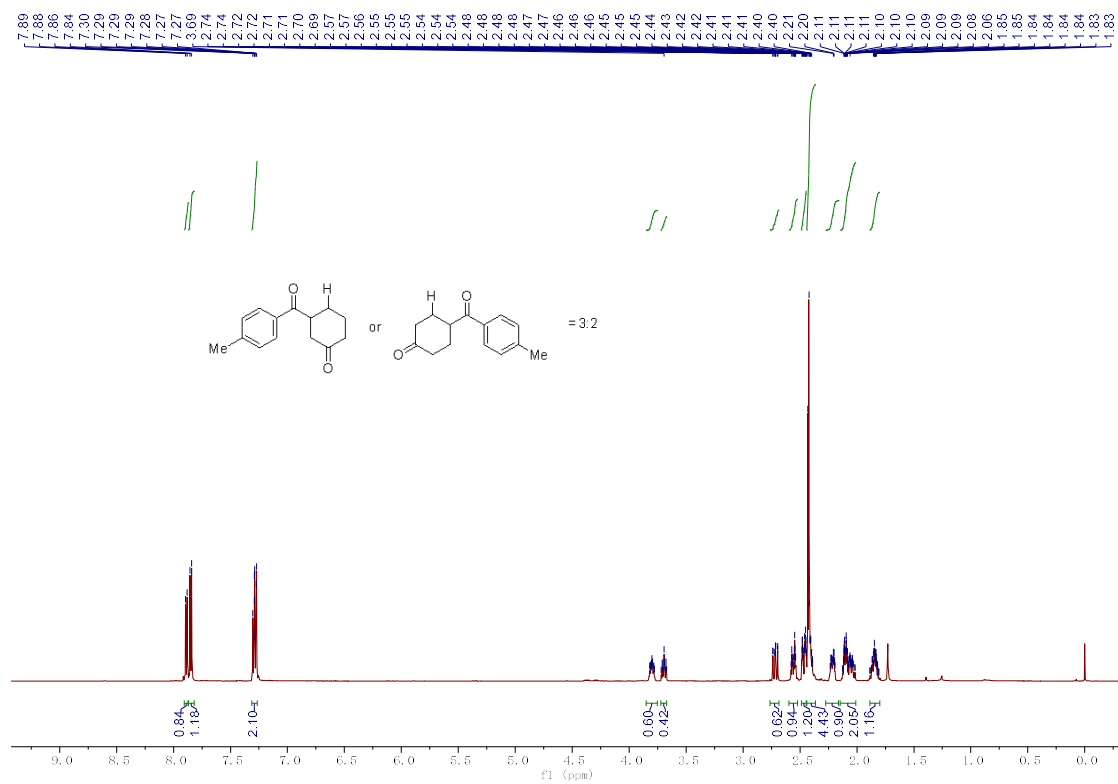

< 210.96  
210.43

< 201.61  
200.14

< 144.54  
144.33  
133.34  
132.90

< 129.66  
129.62  
128.63  
128.30

< 45.17  
43.34  
42.73  
41.12

< 40.07  
28.99  
28.99  
24.99  
21.77

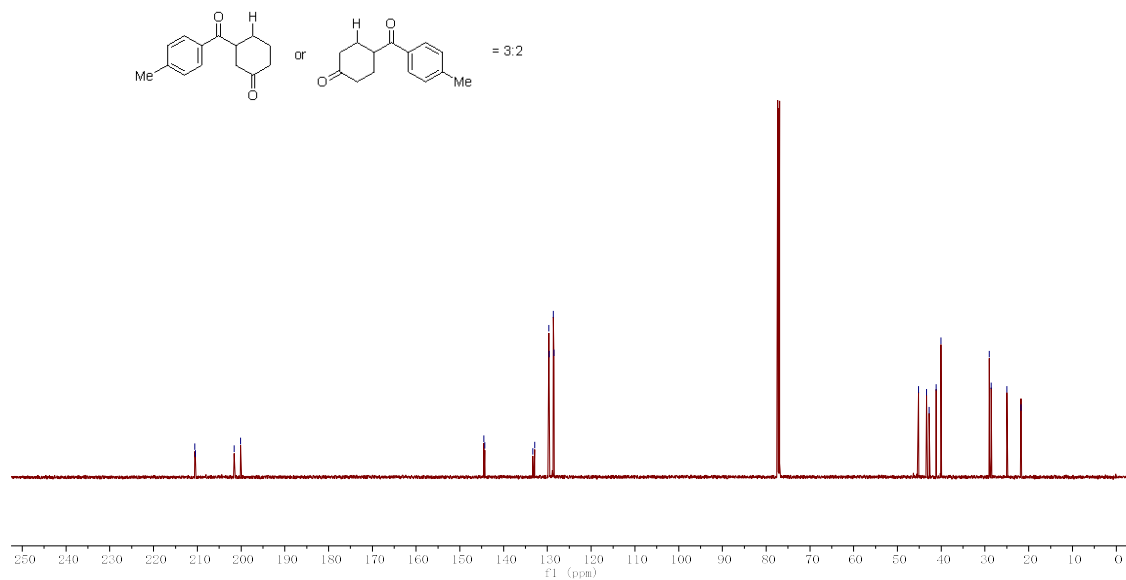

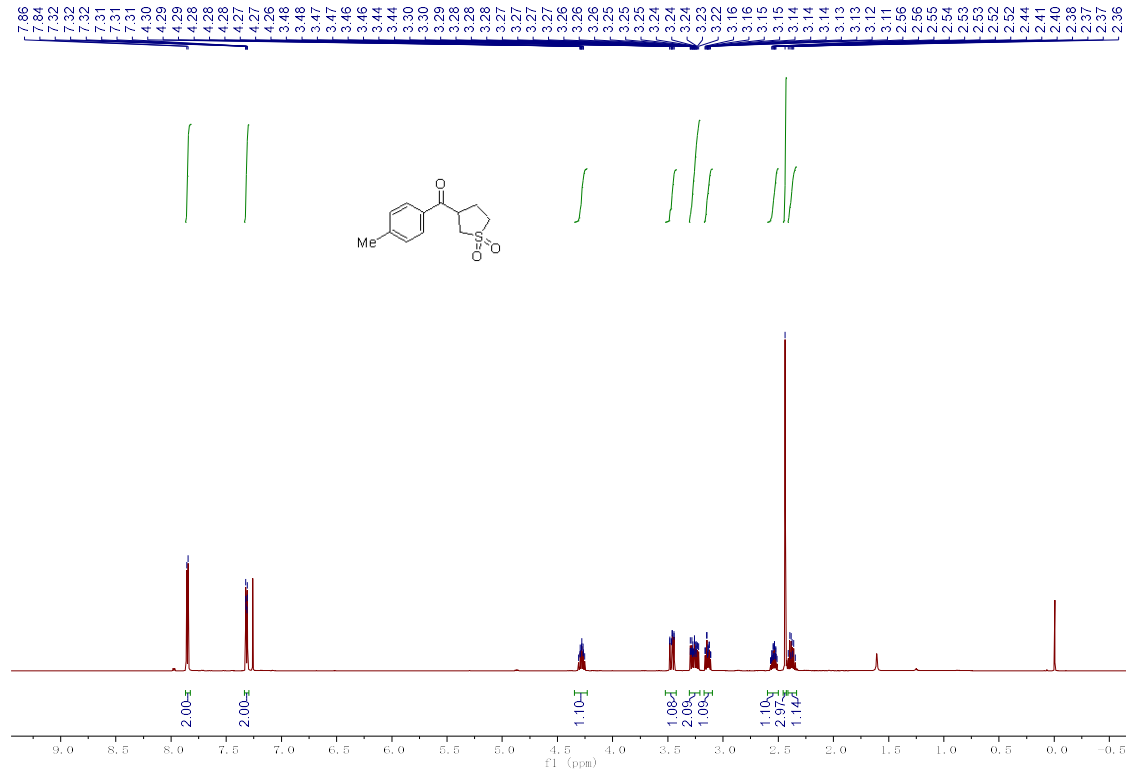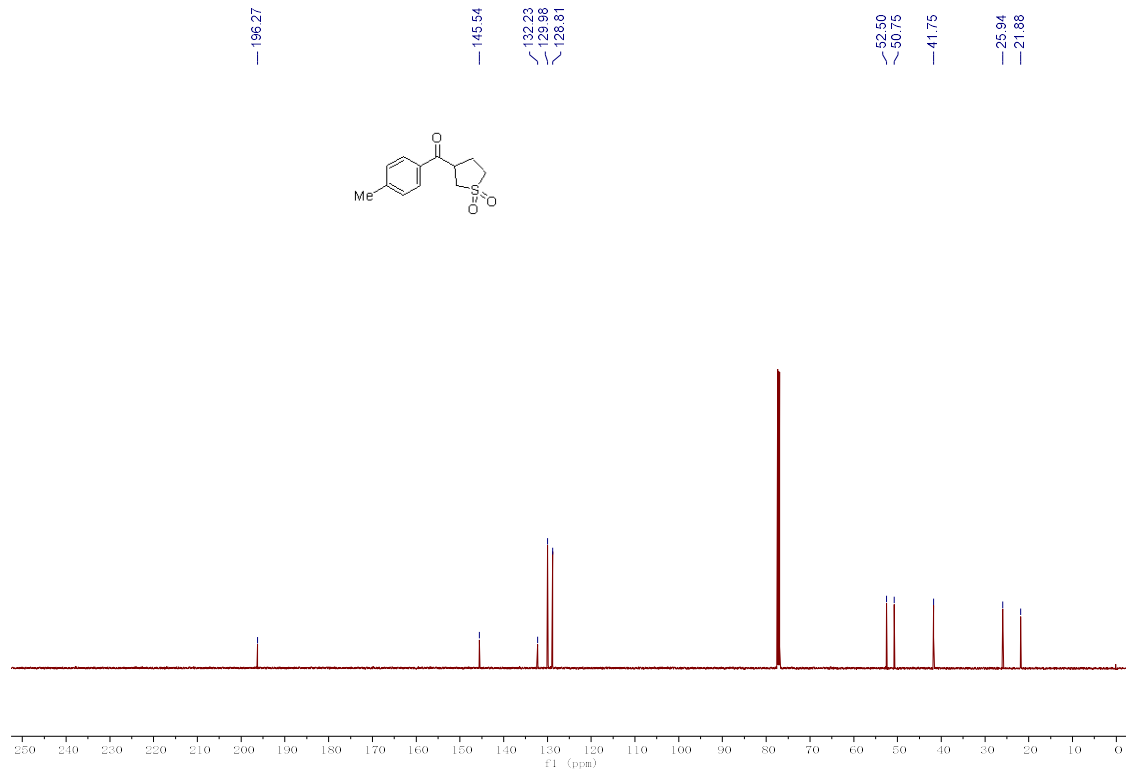

31

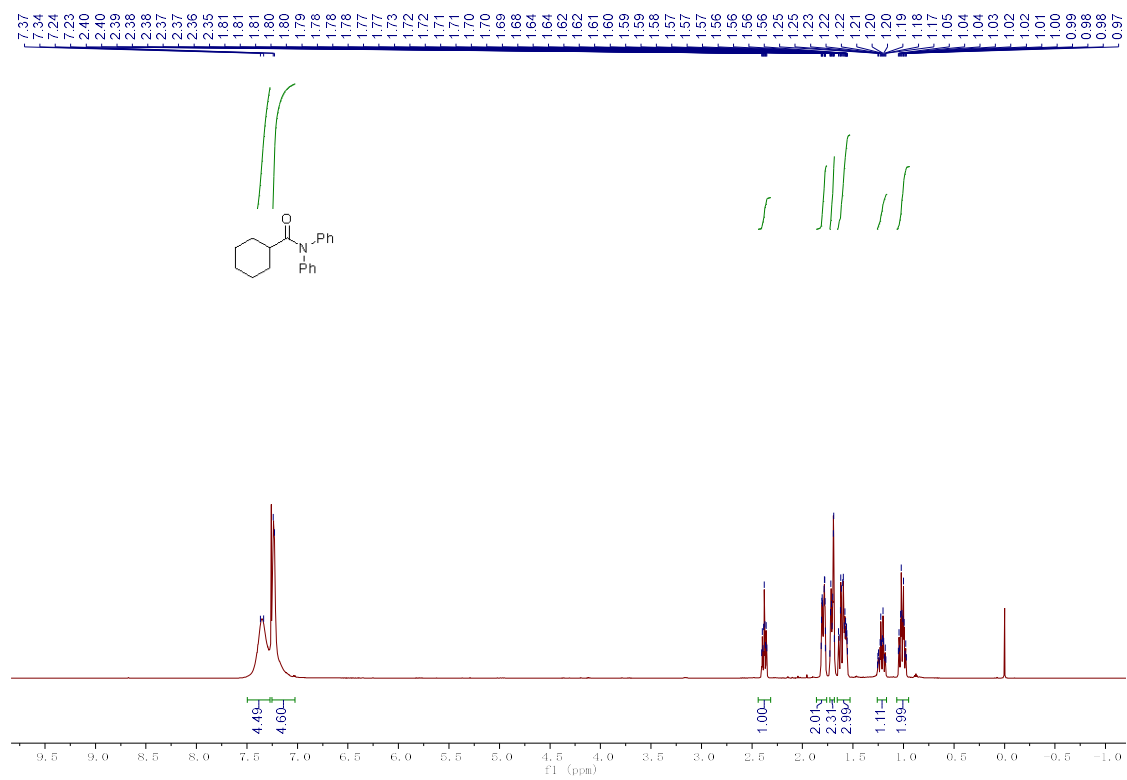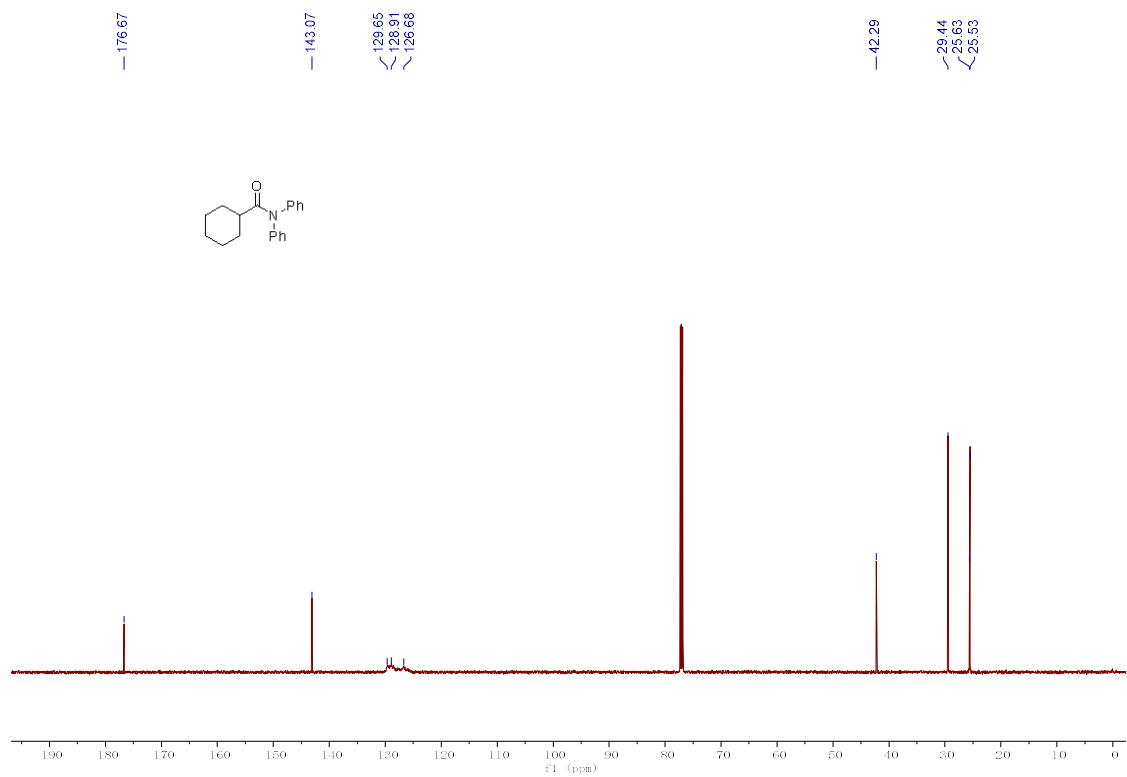

33

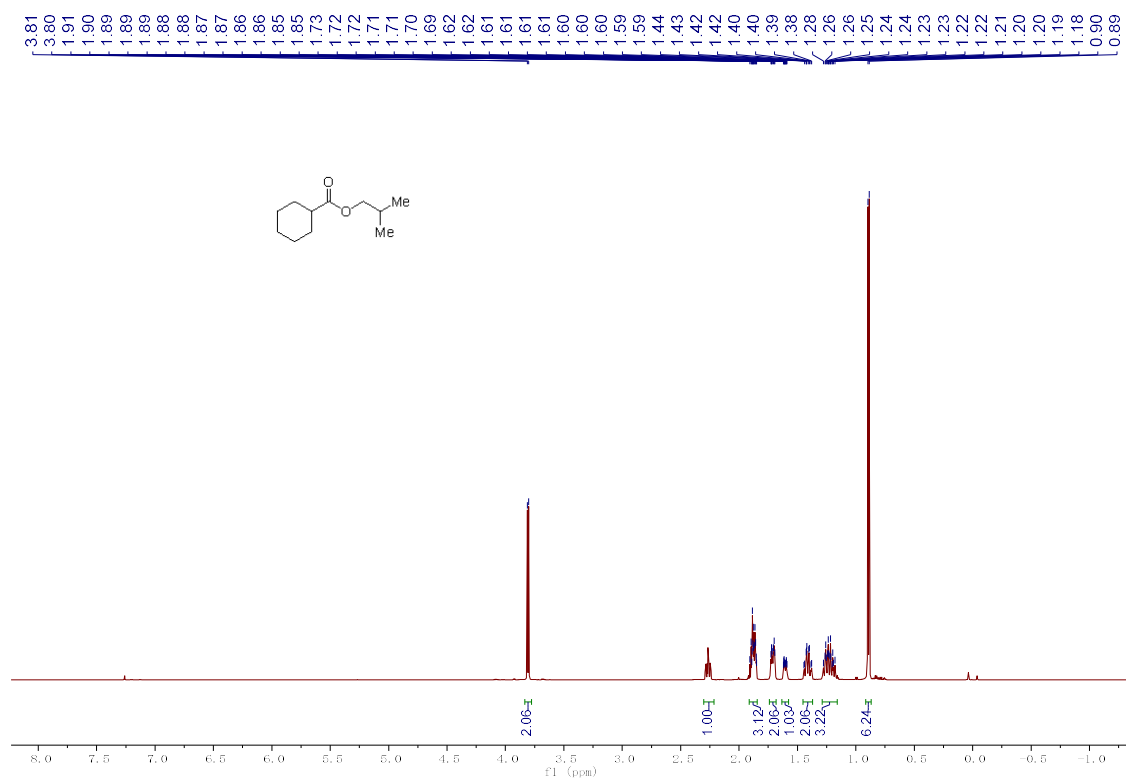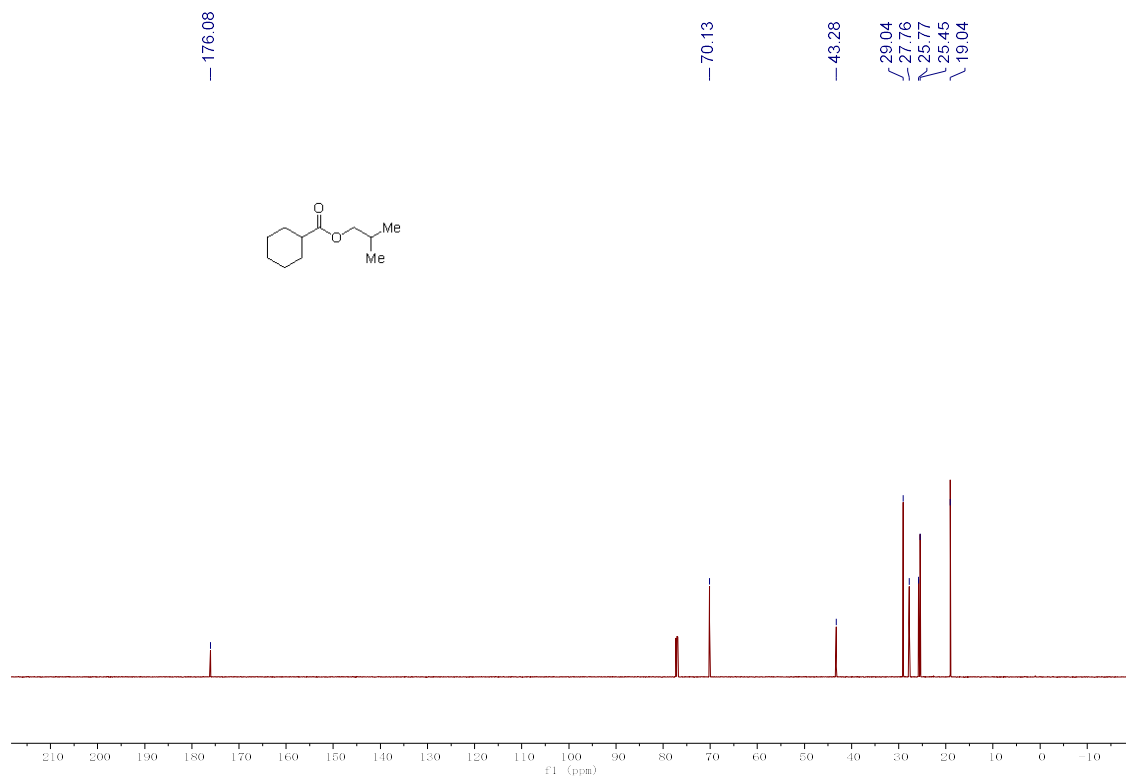

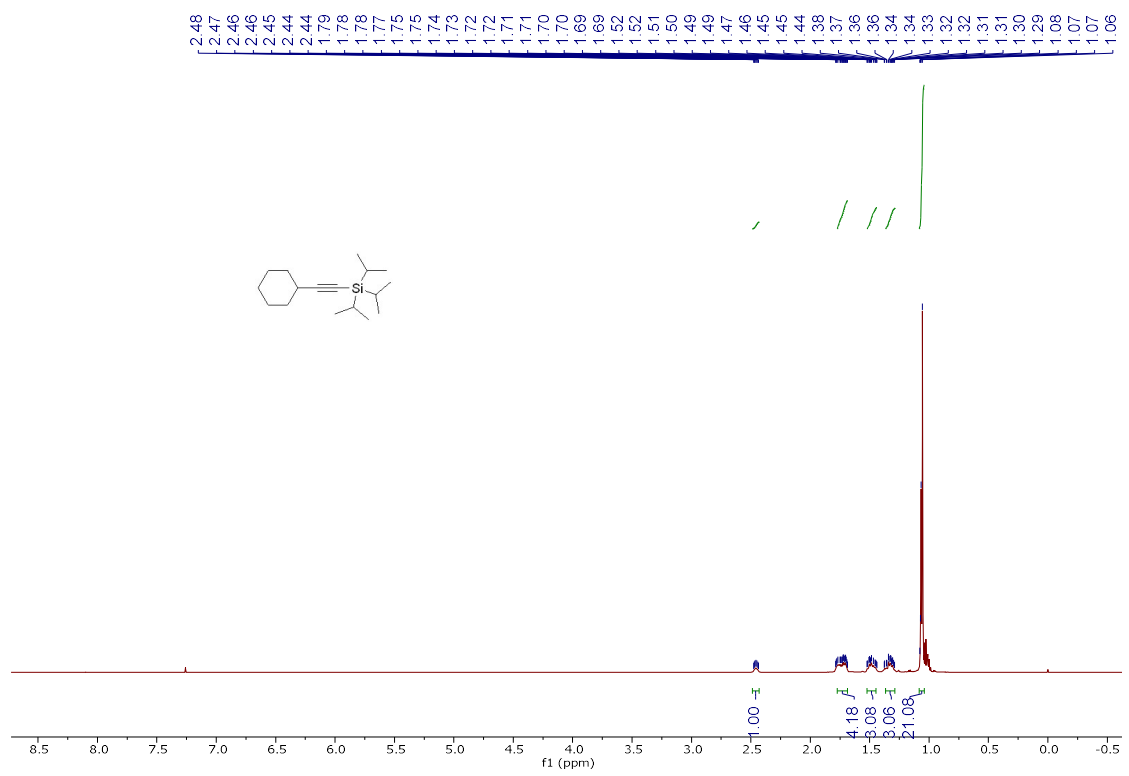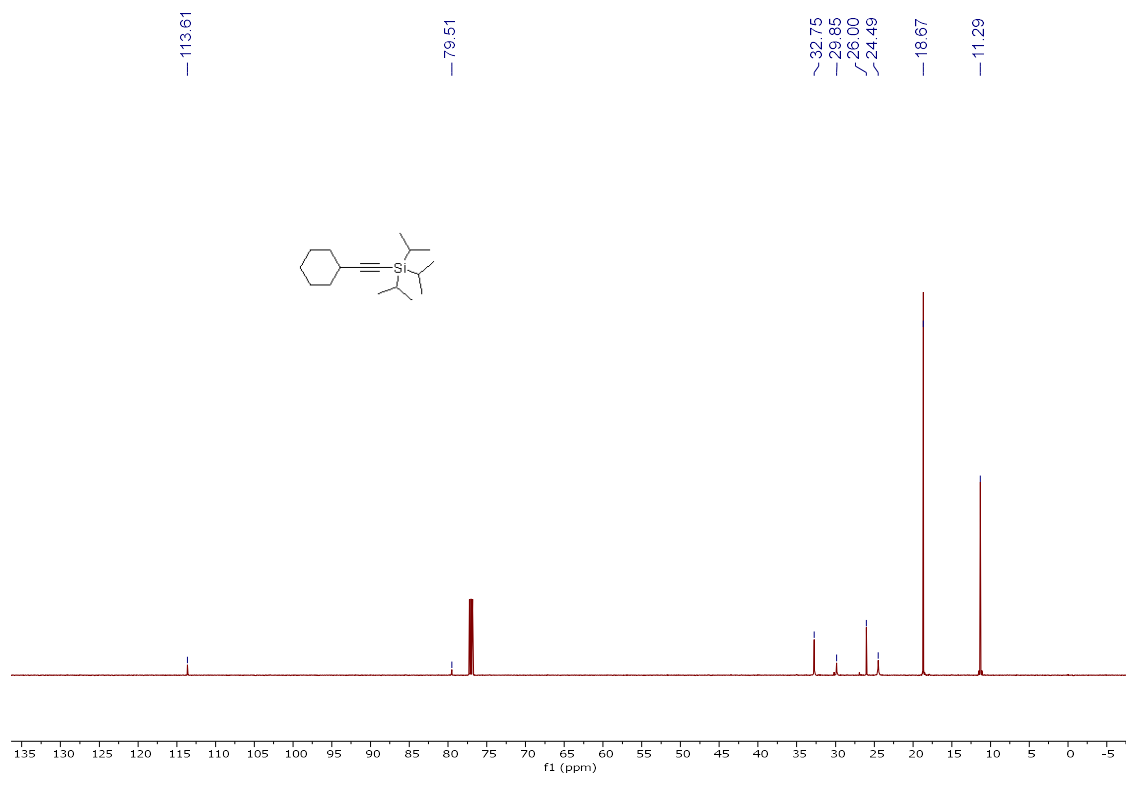

35

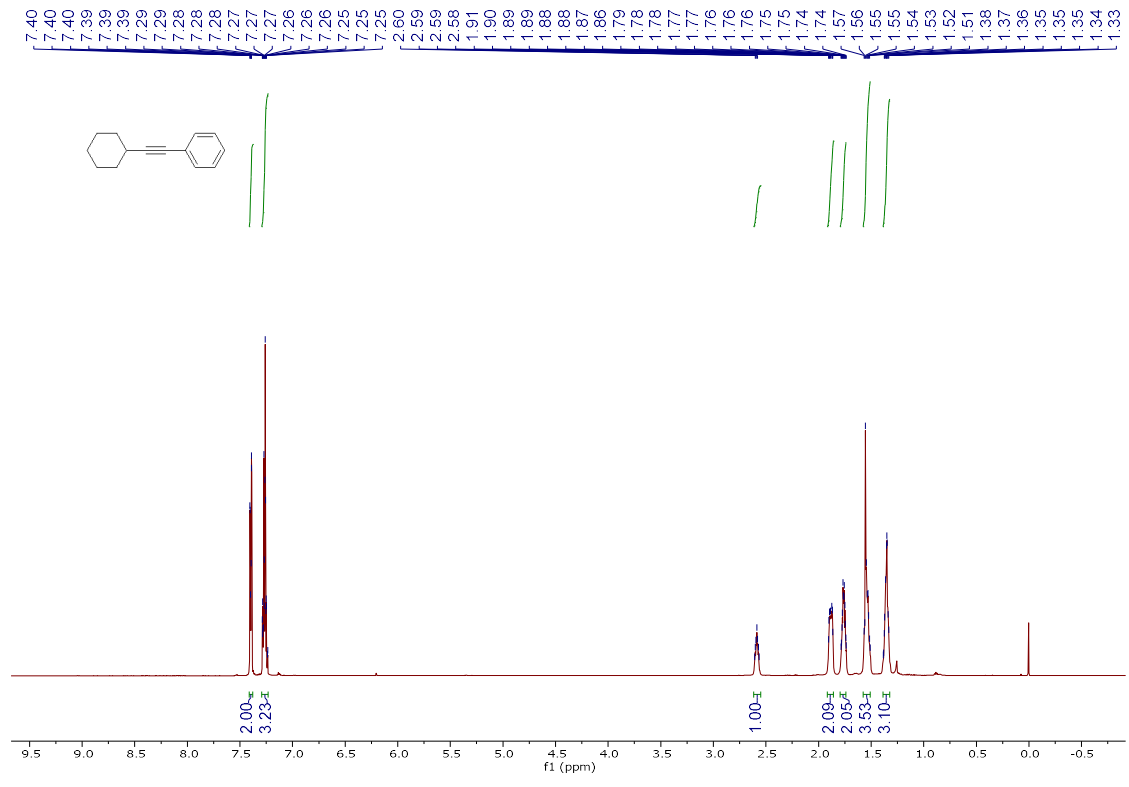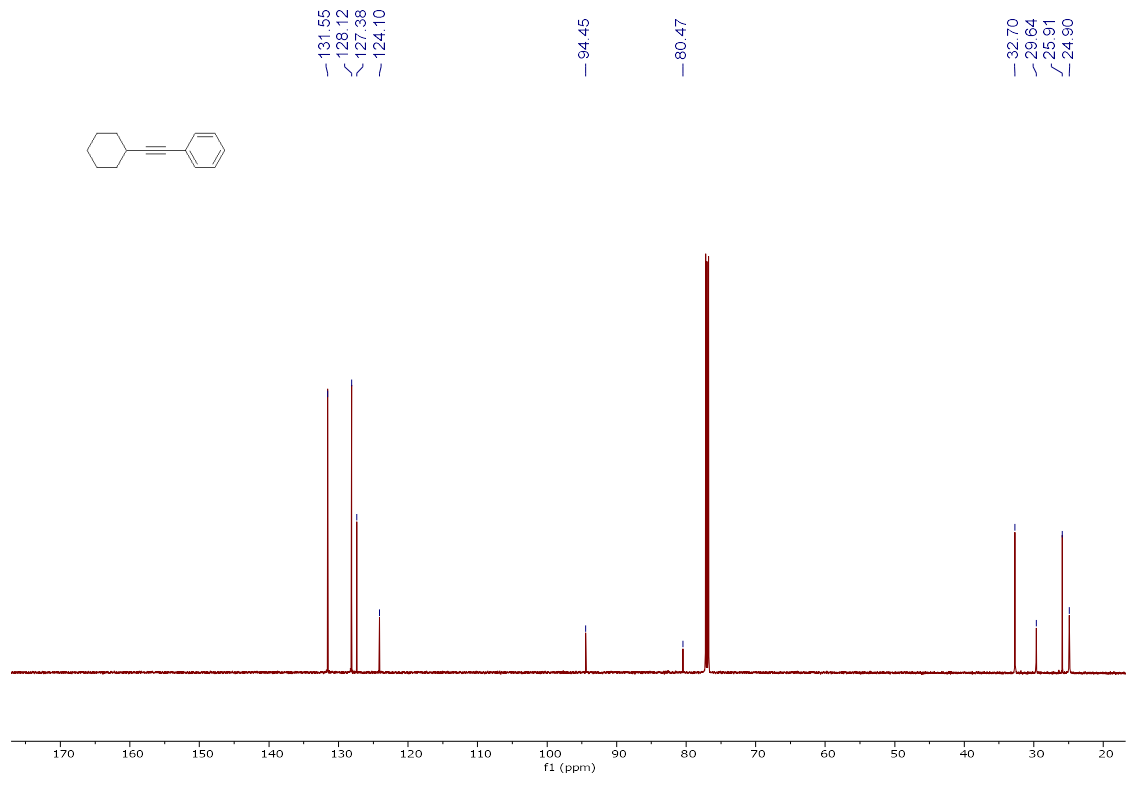



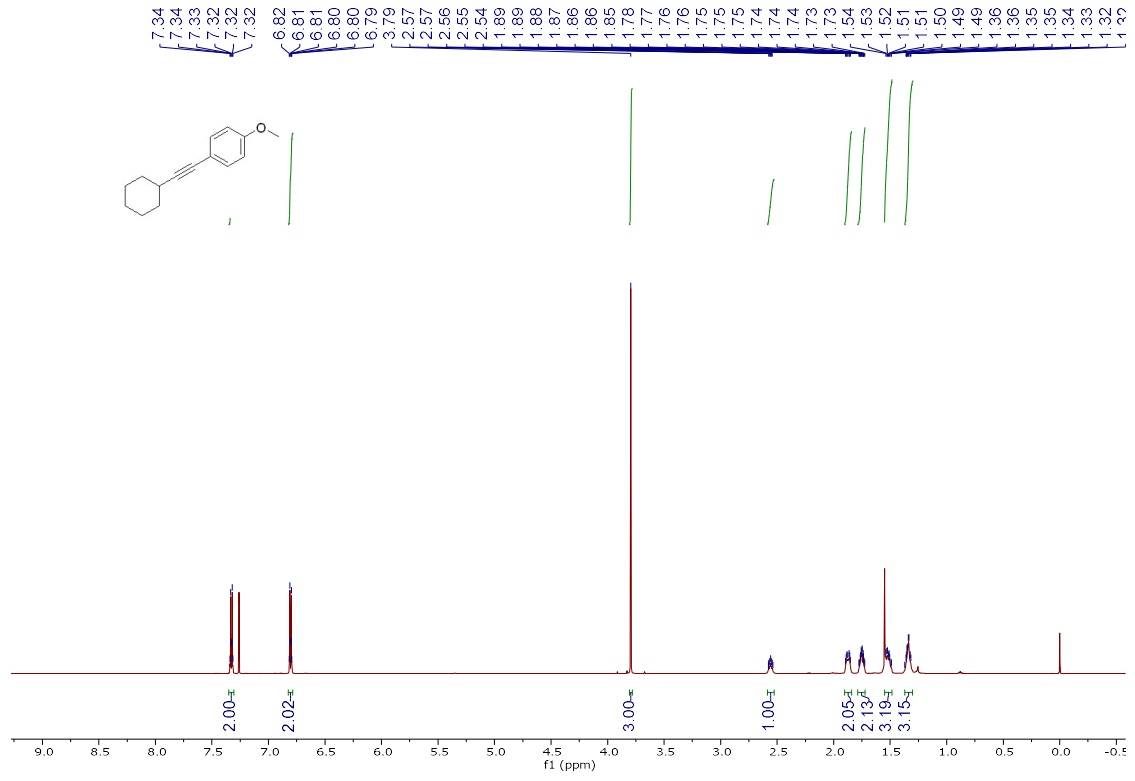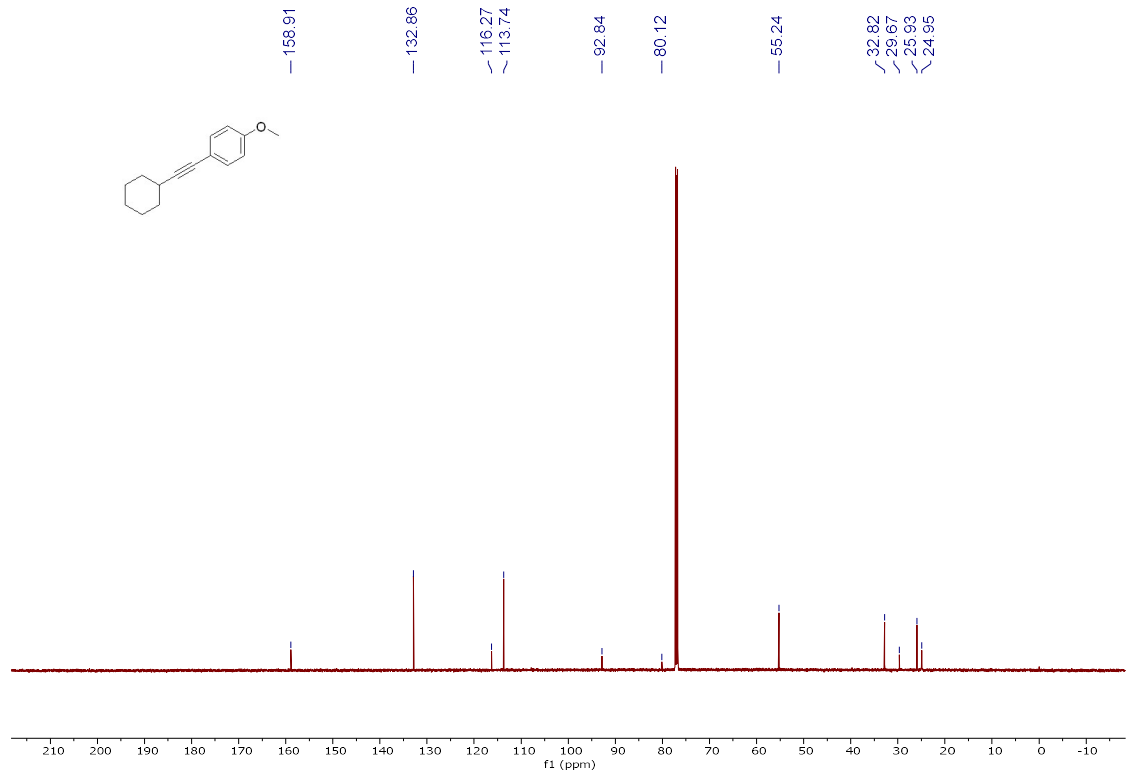

37

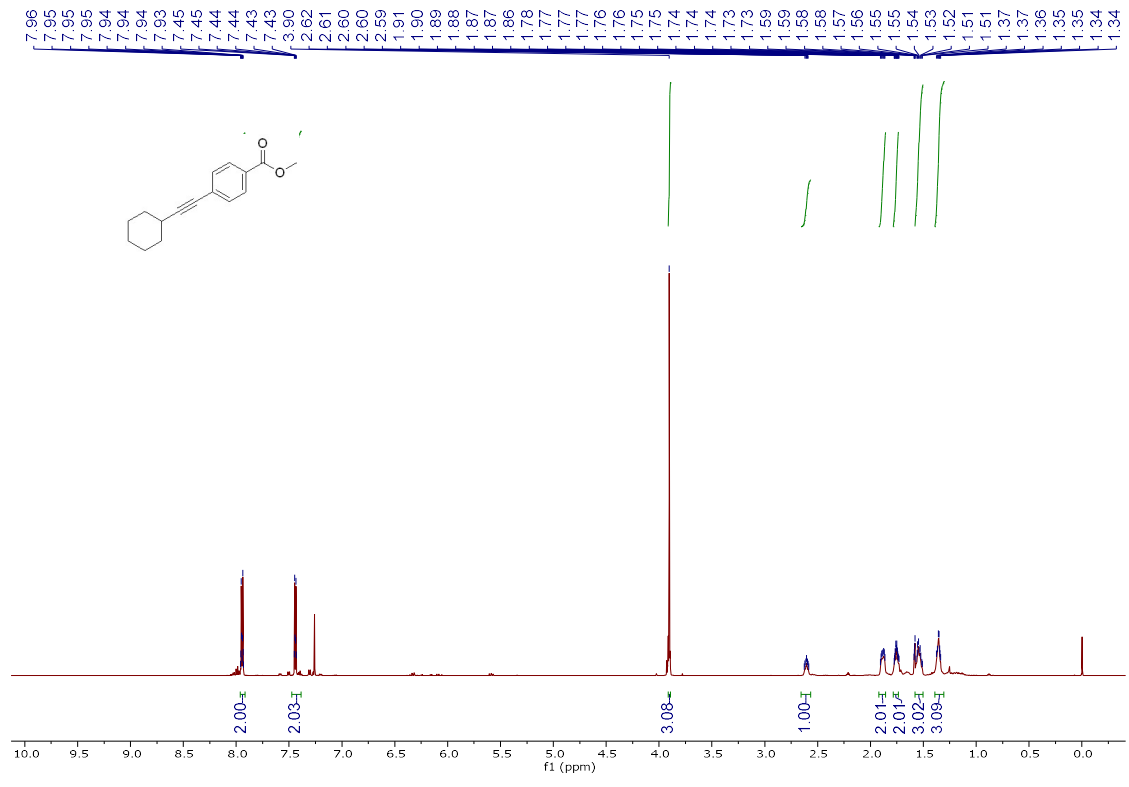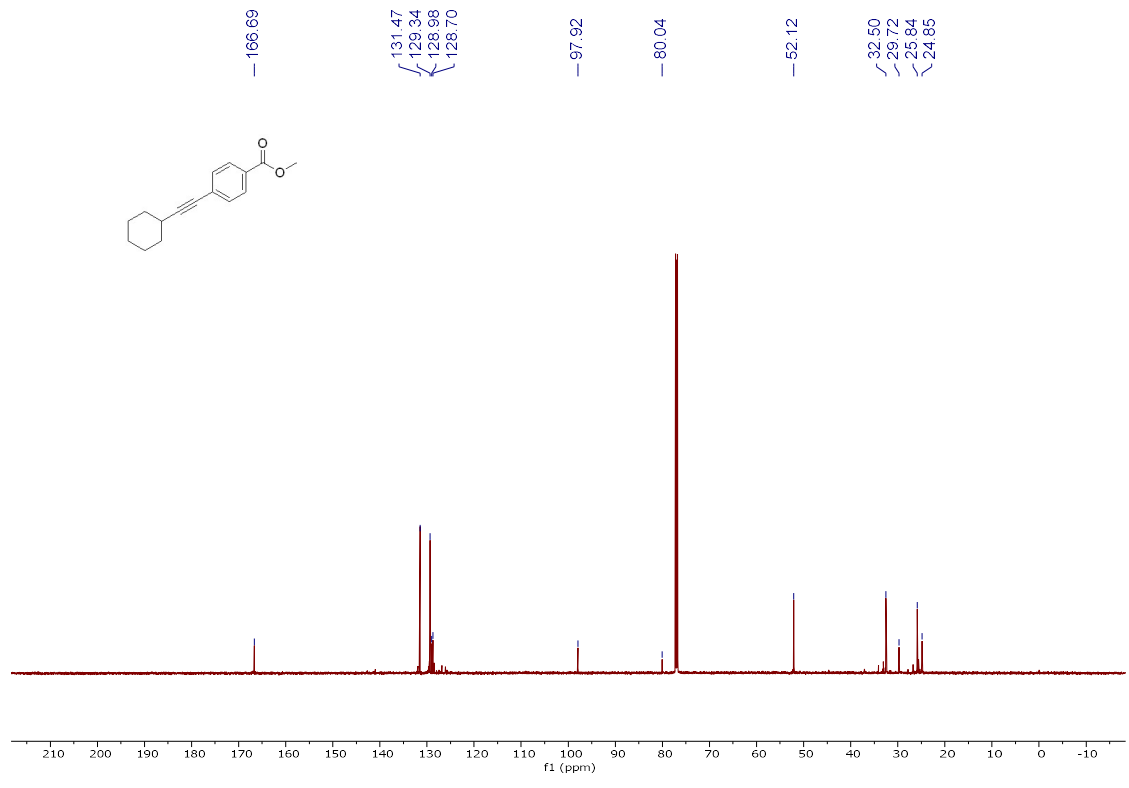

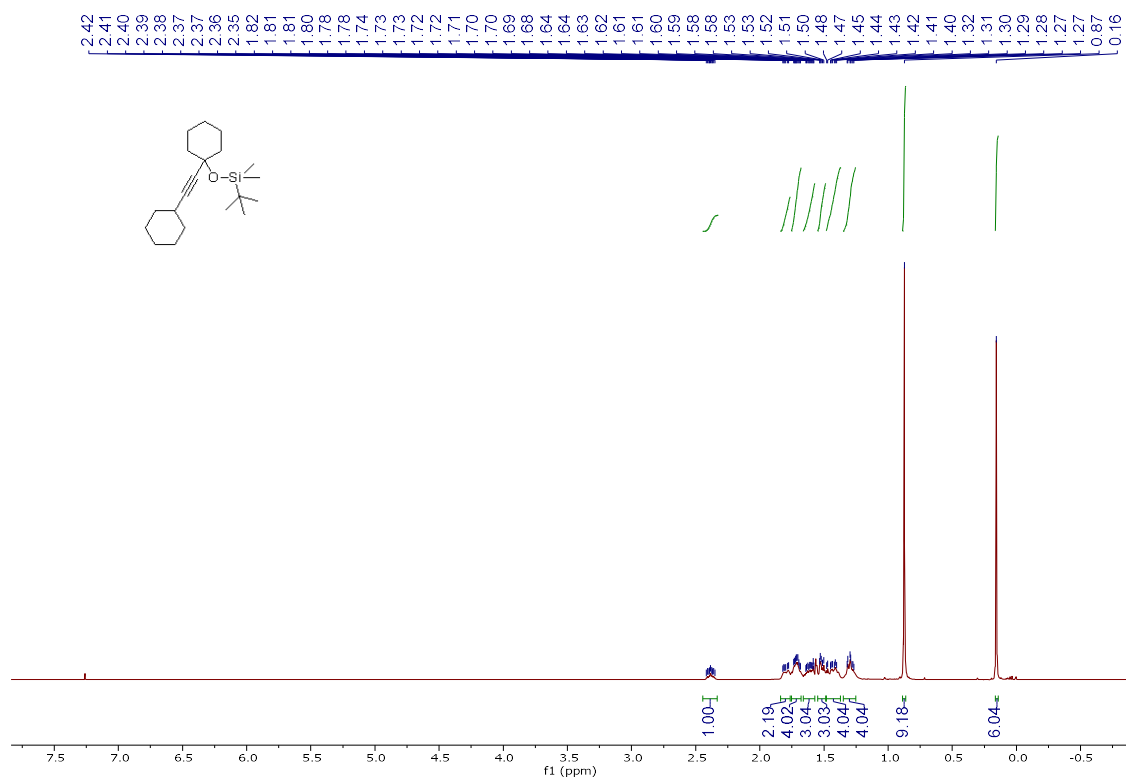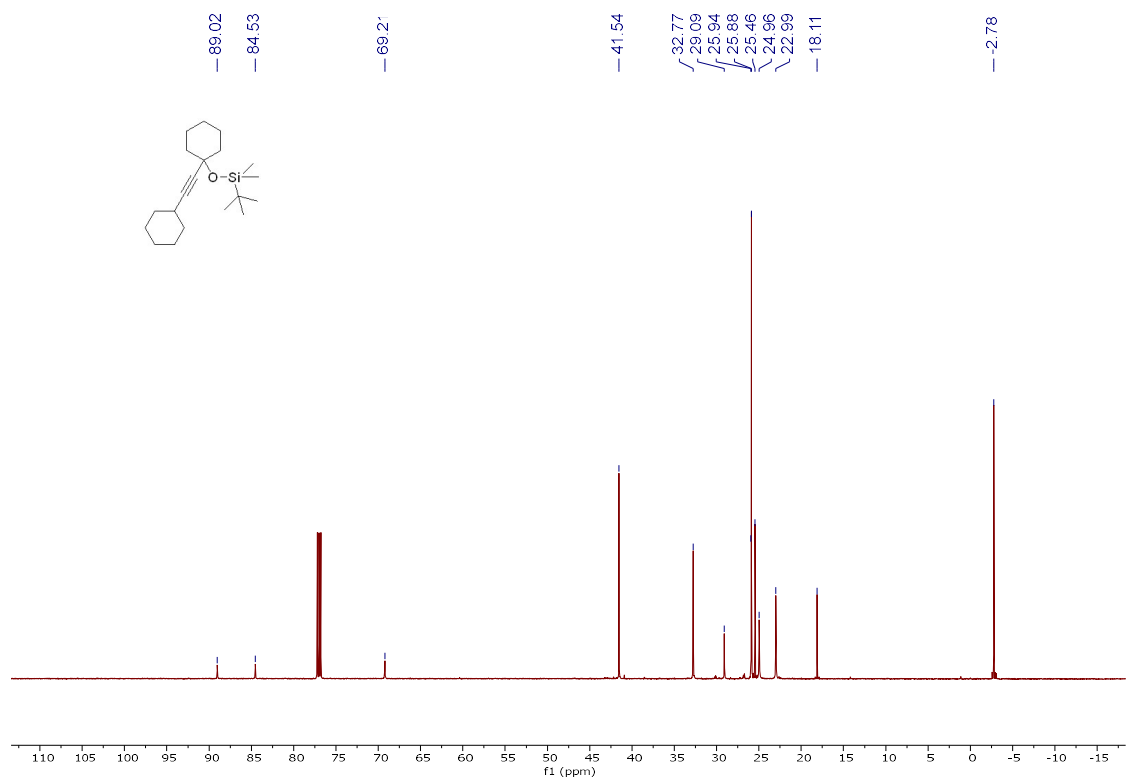

39

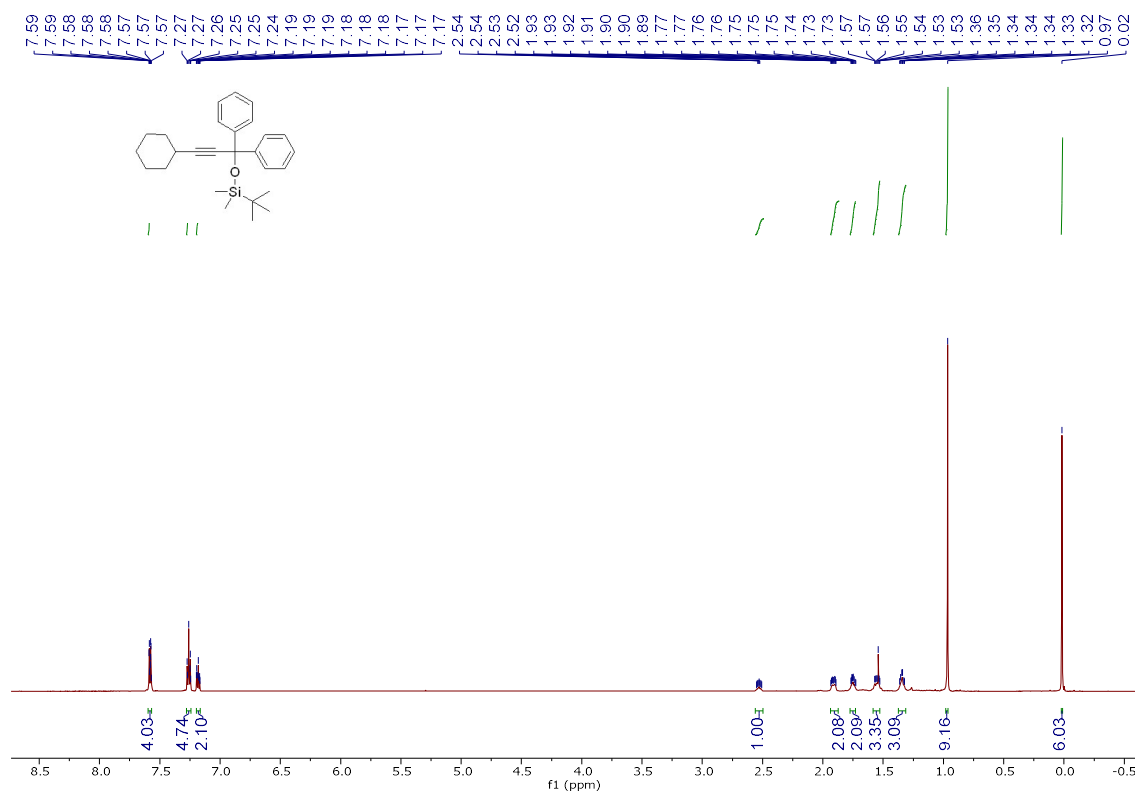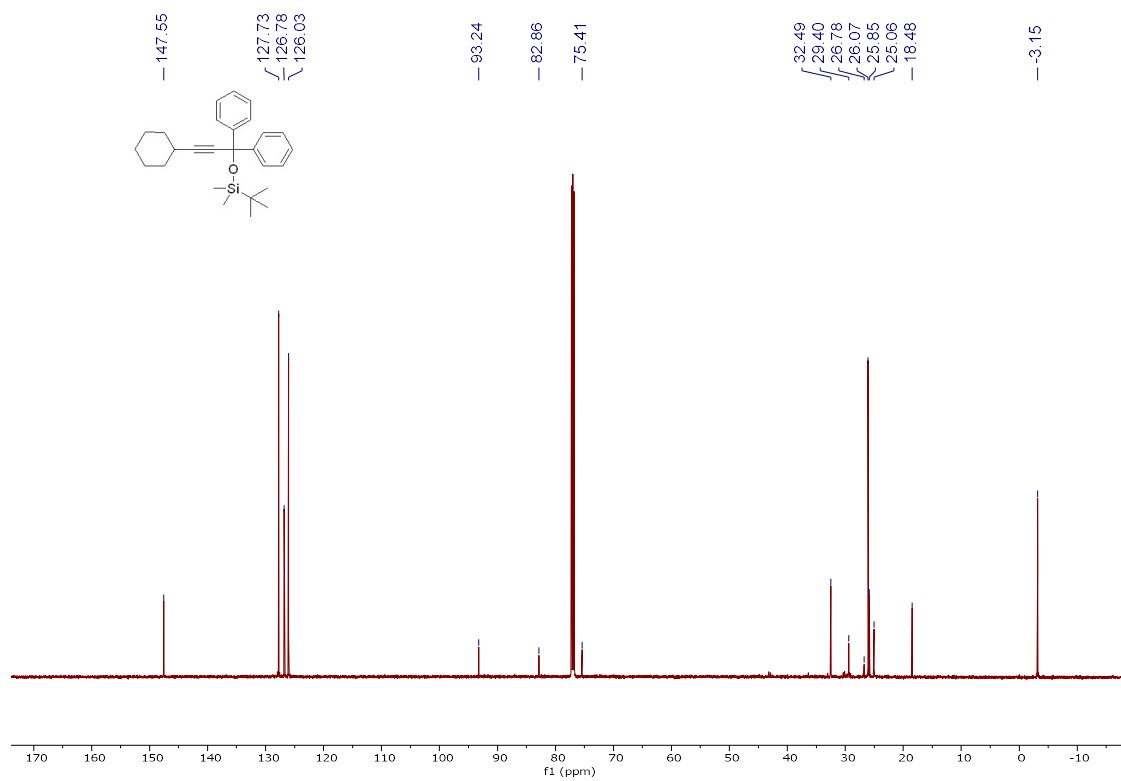

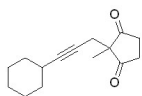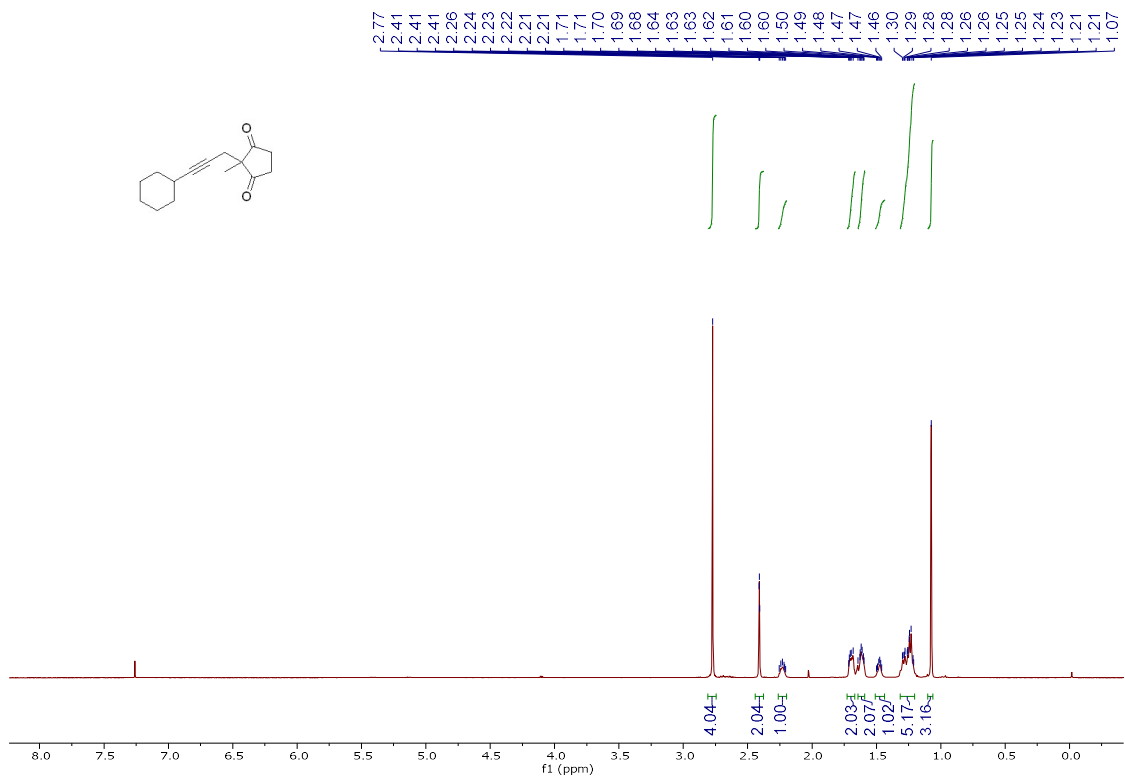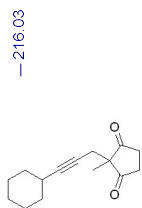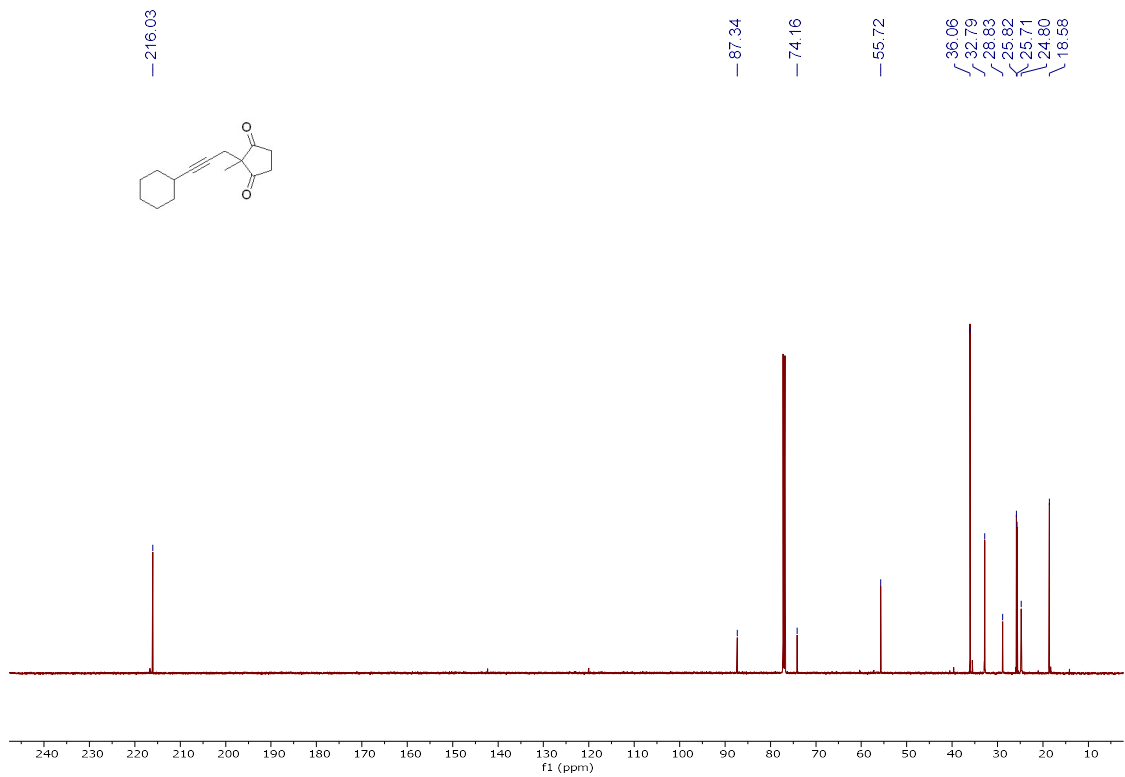

41

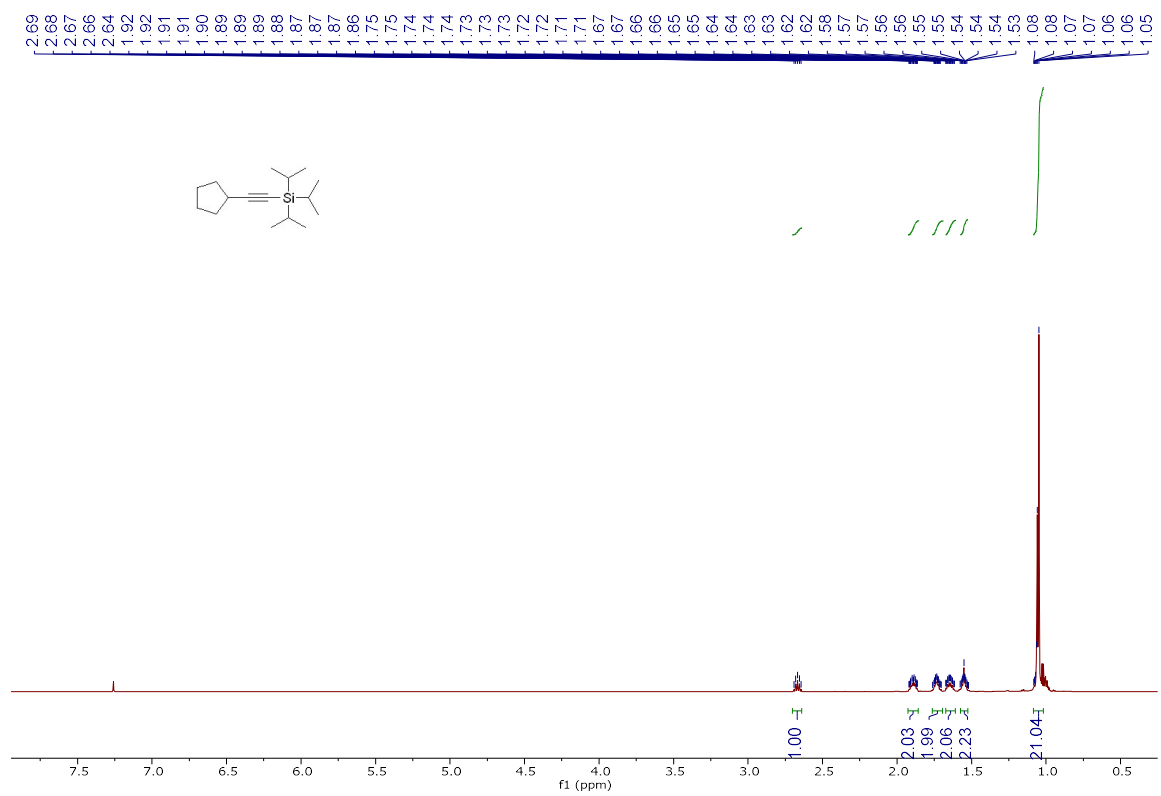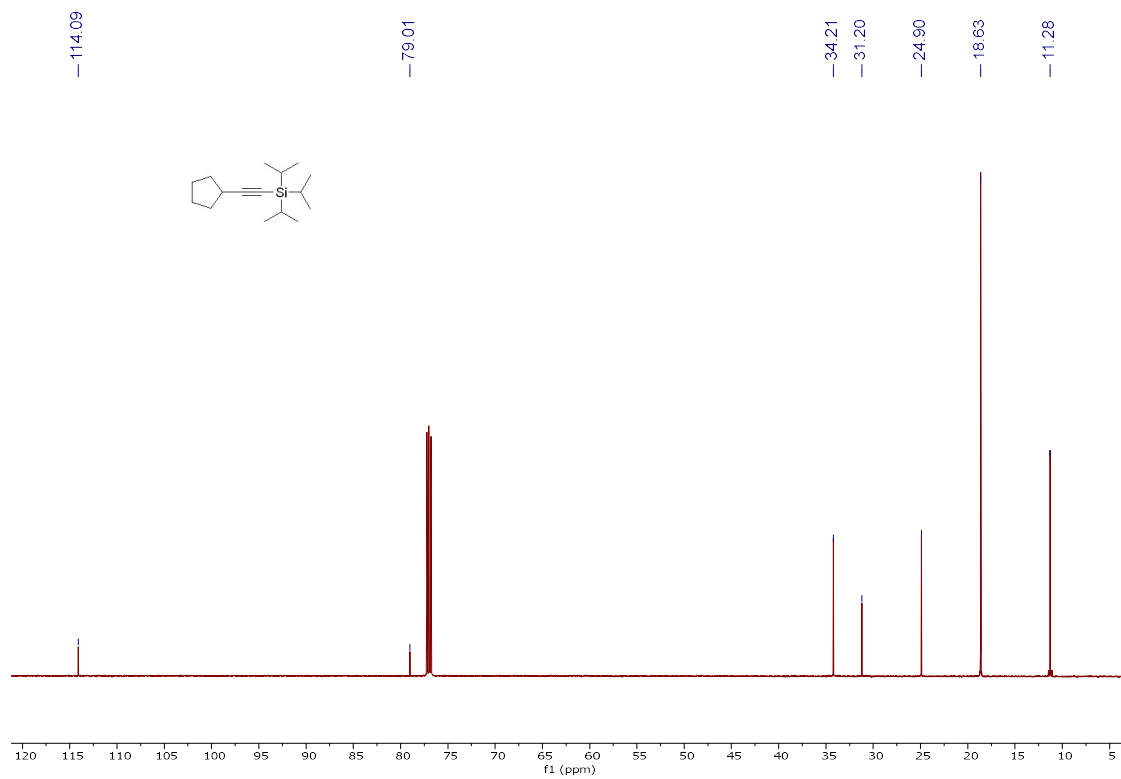

42

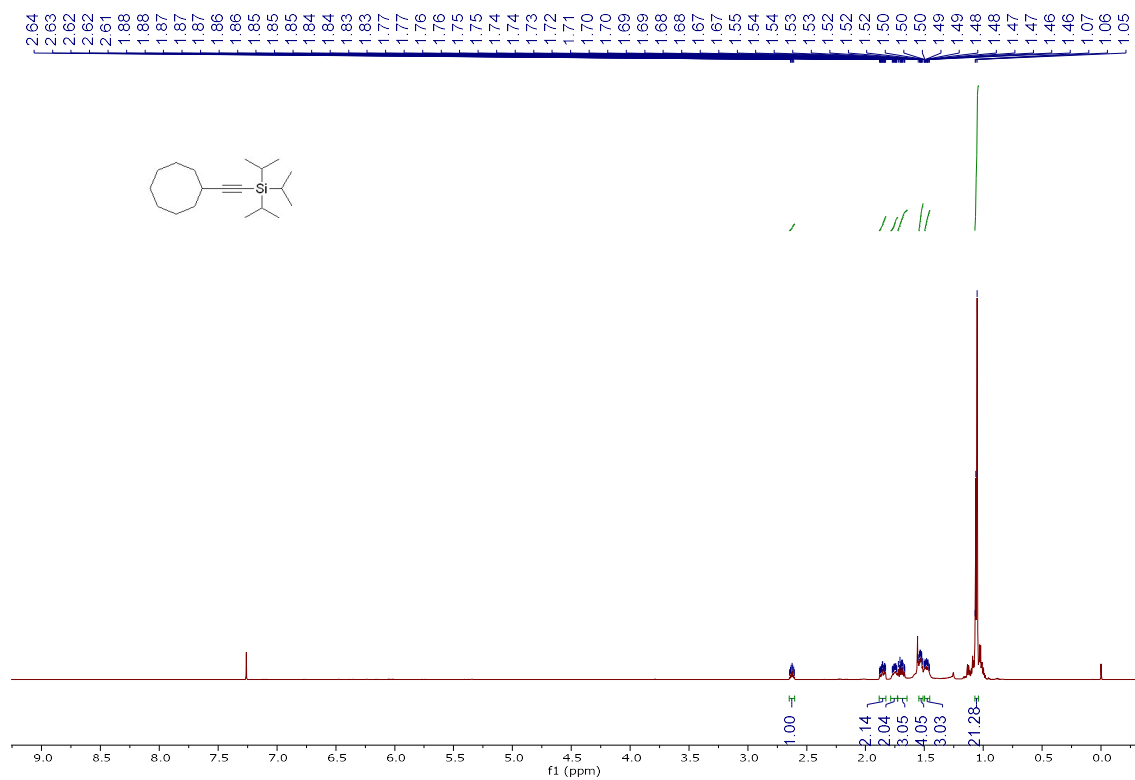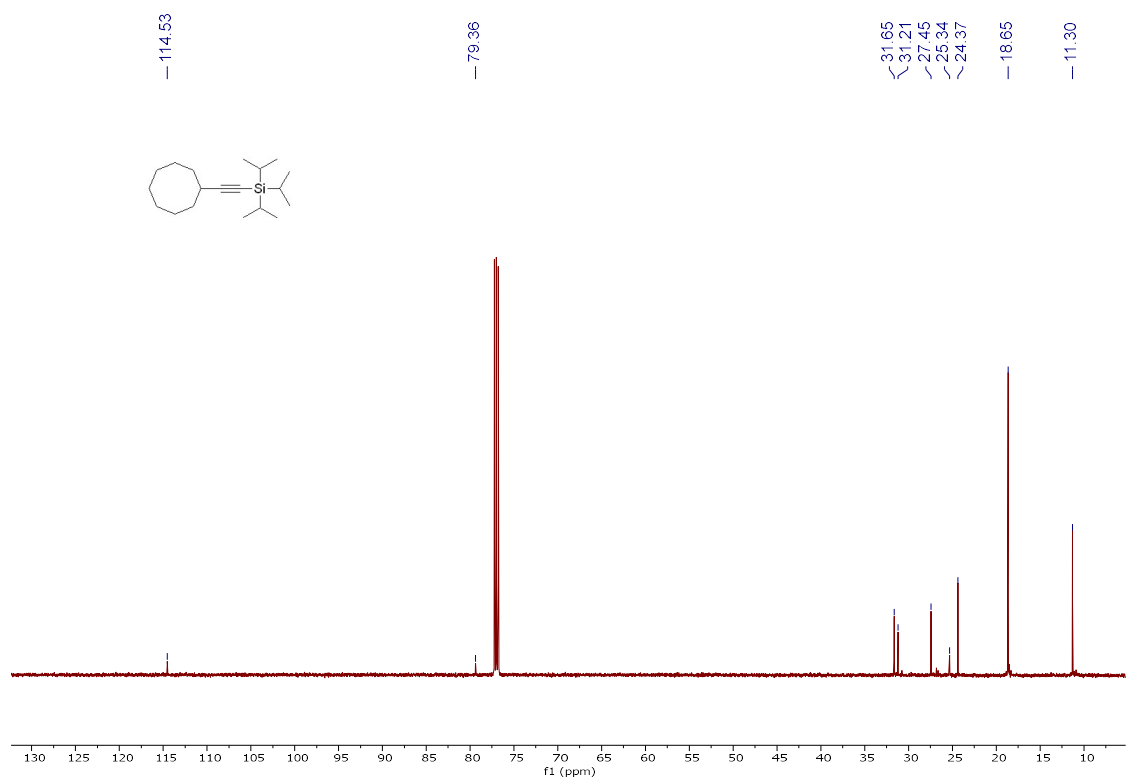

43

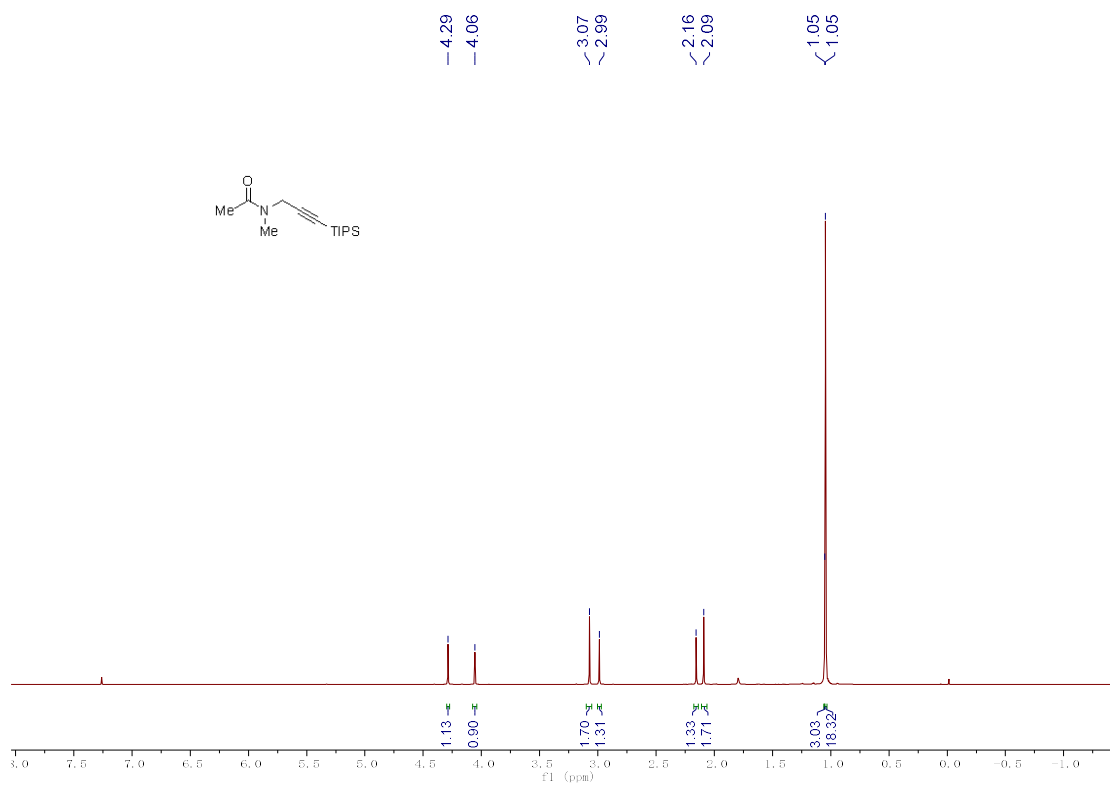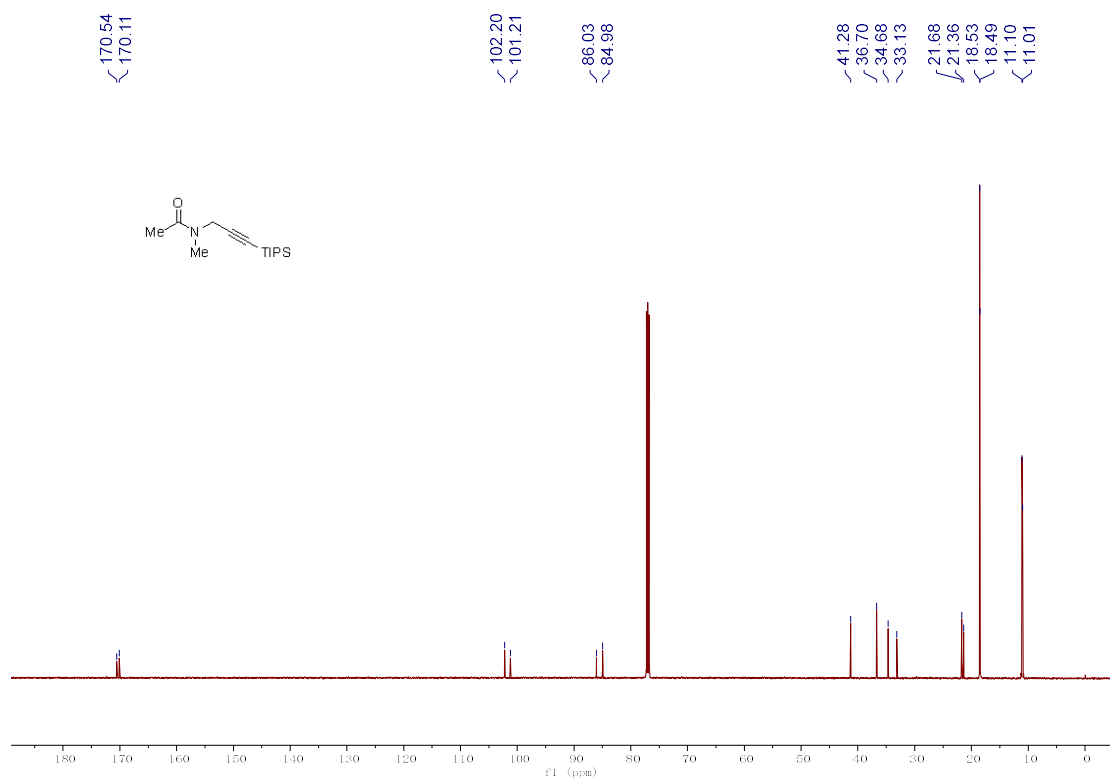



44

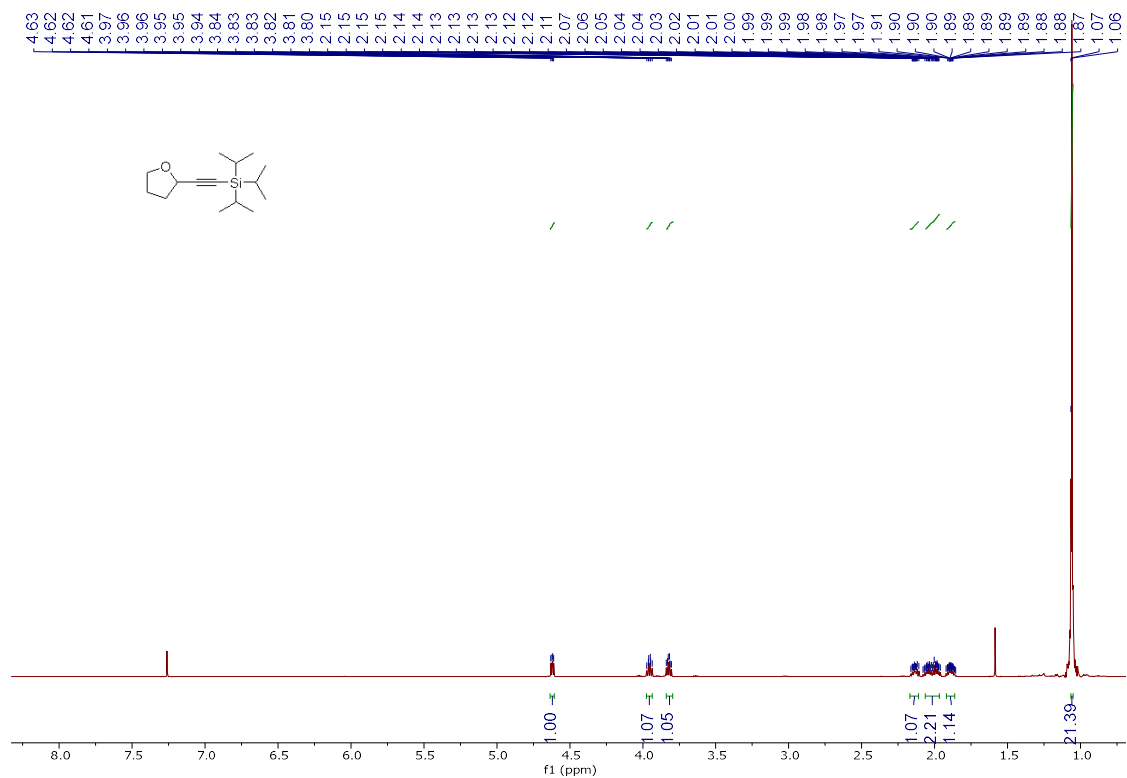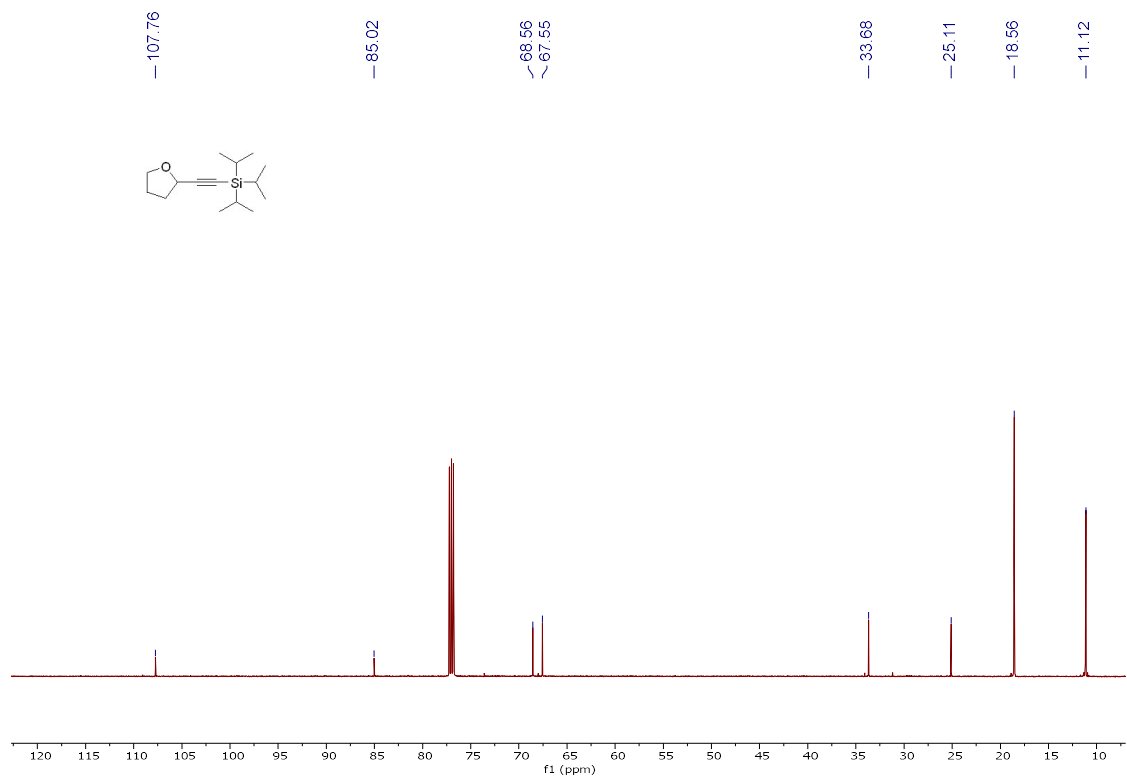

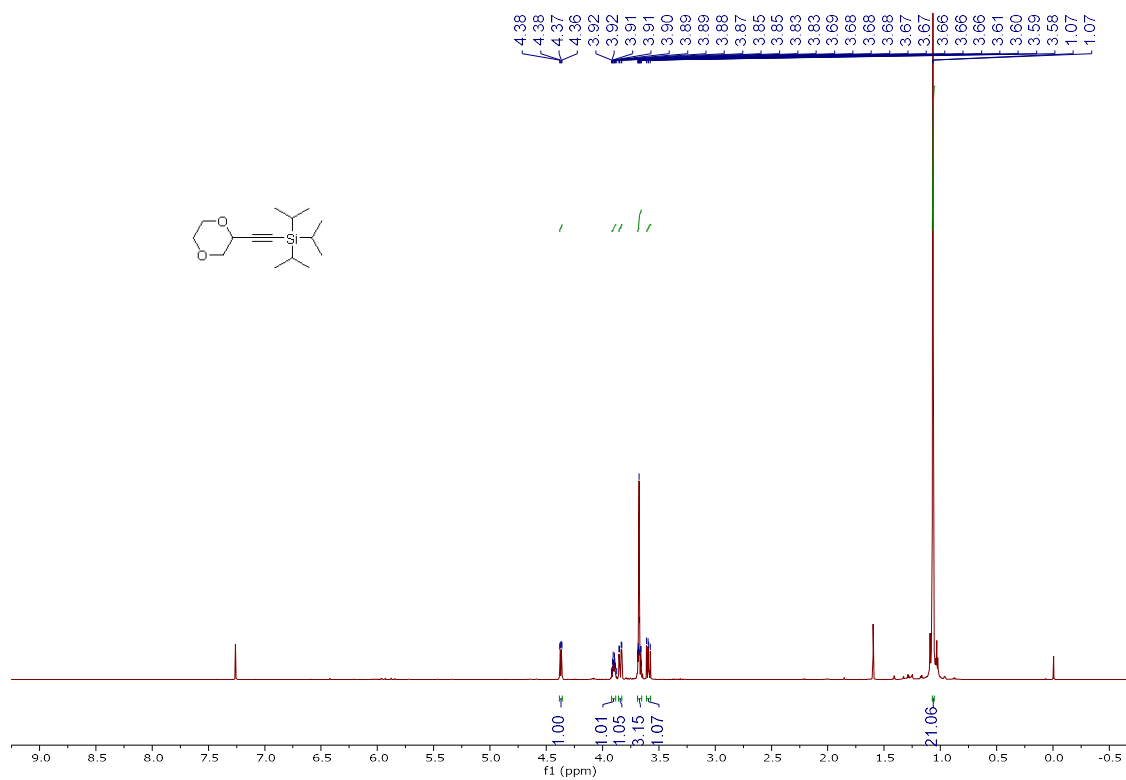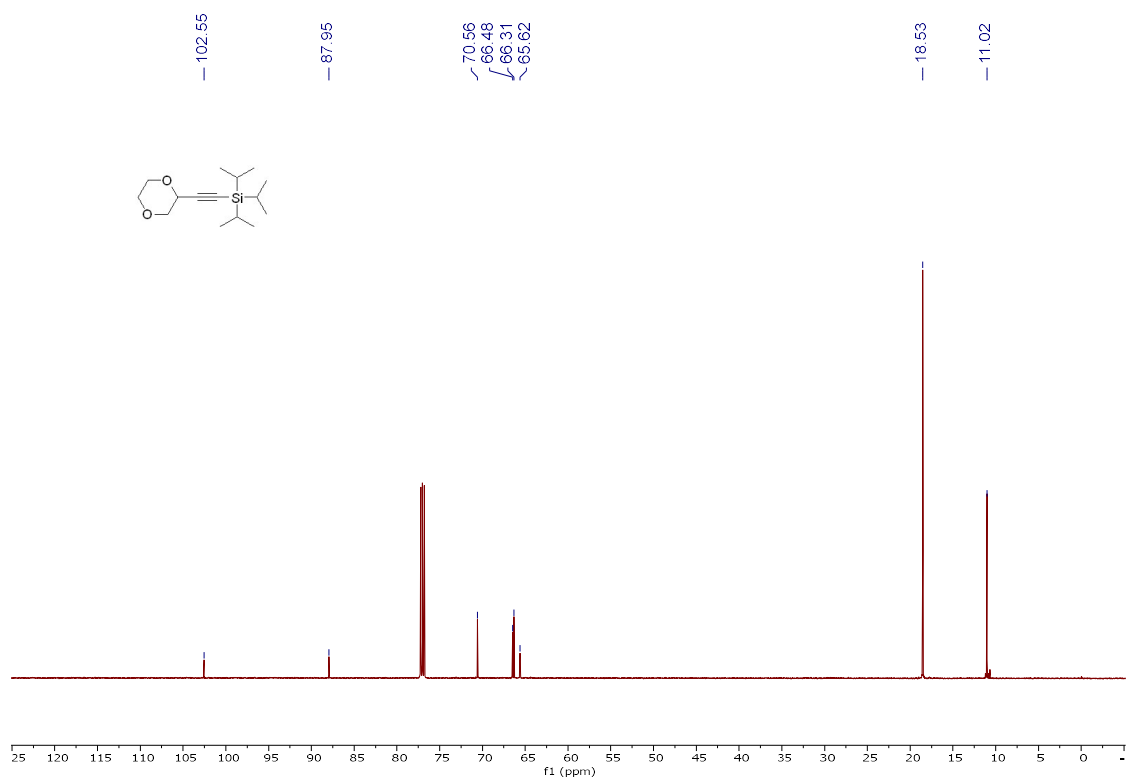

46

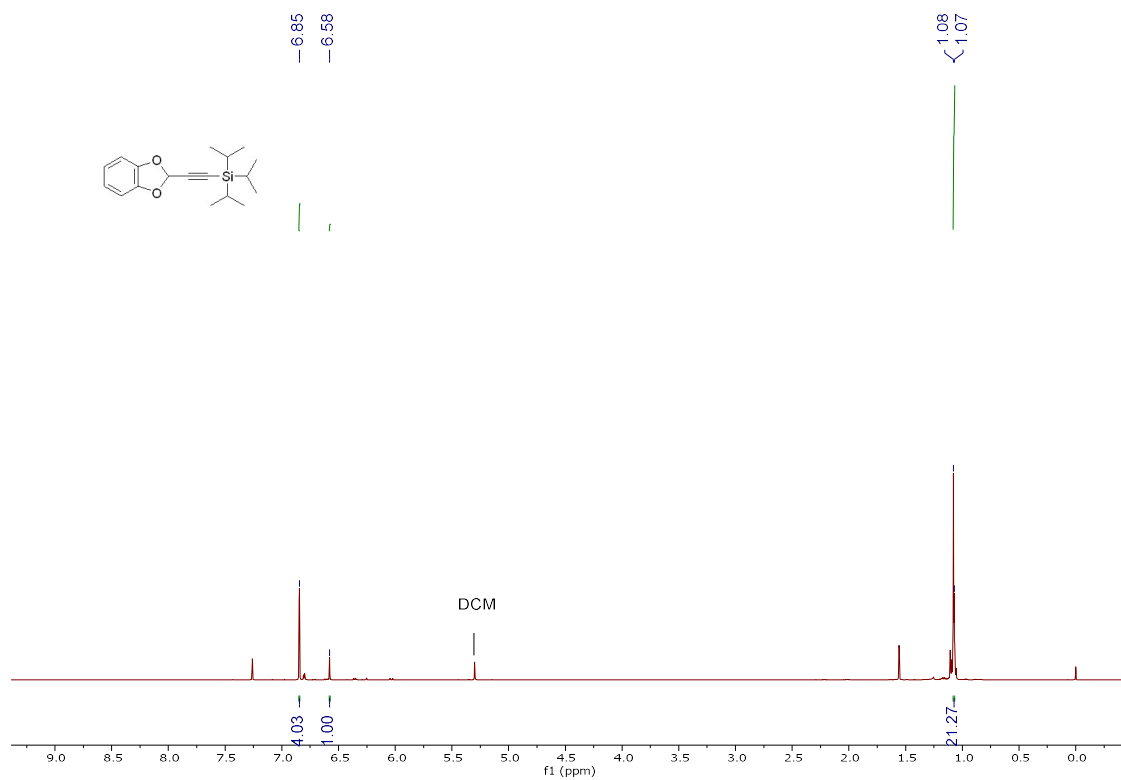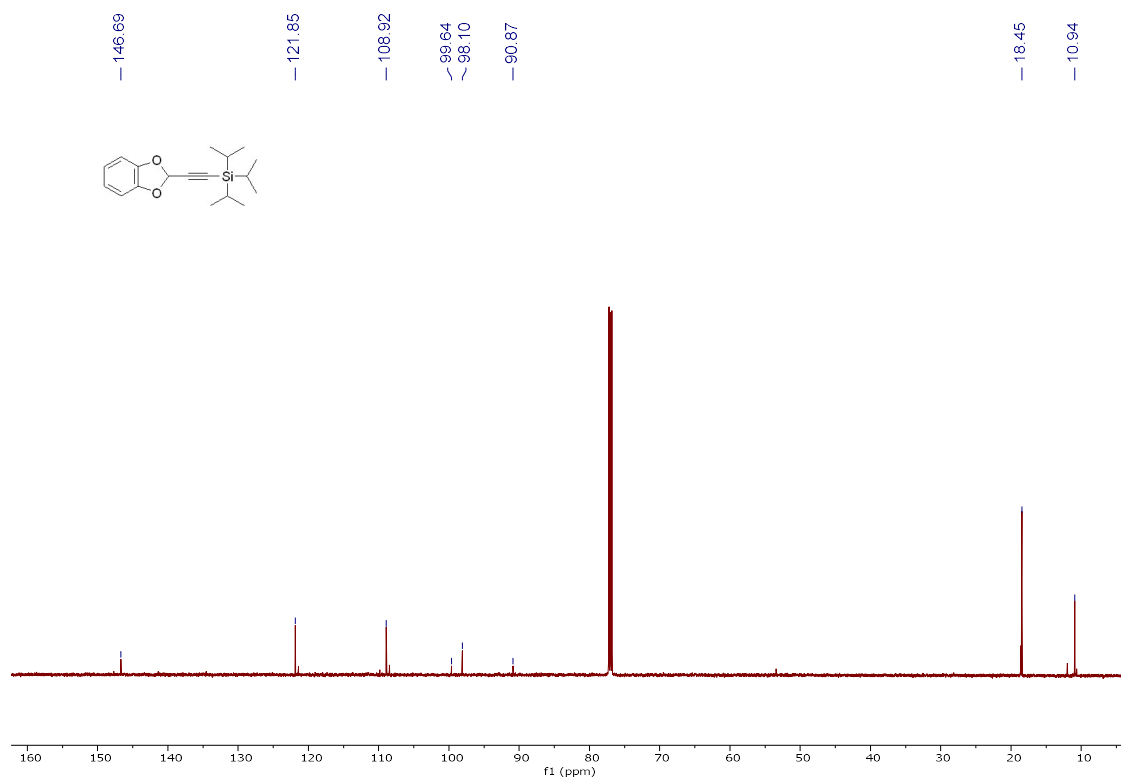

47

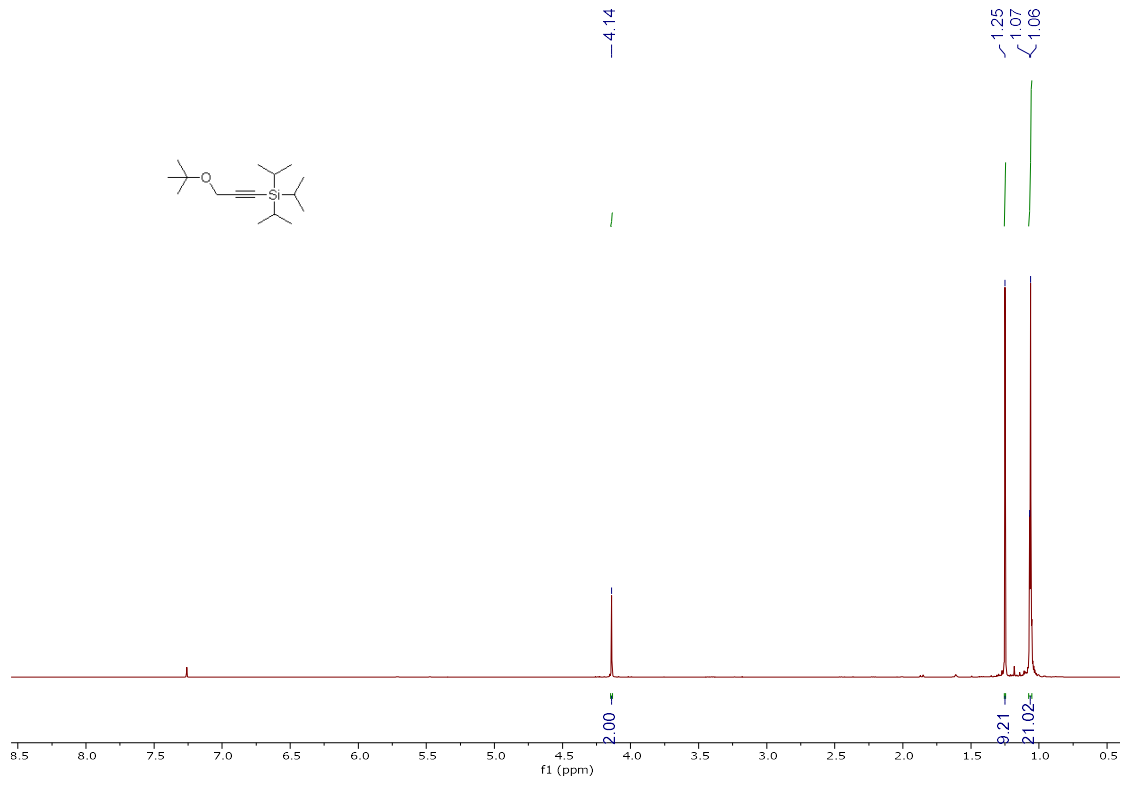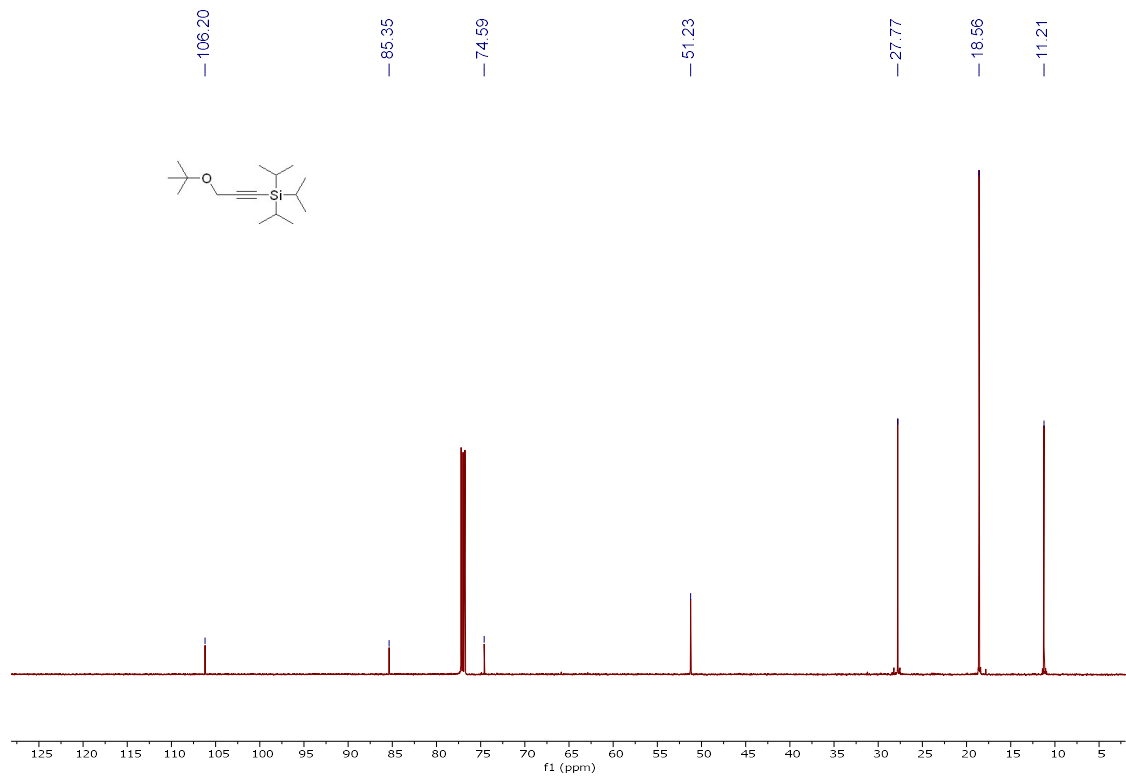

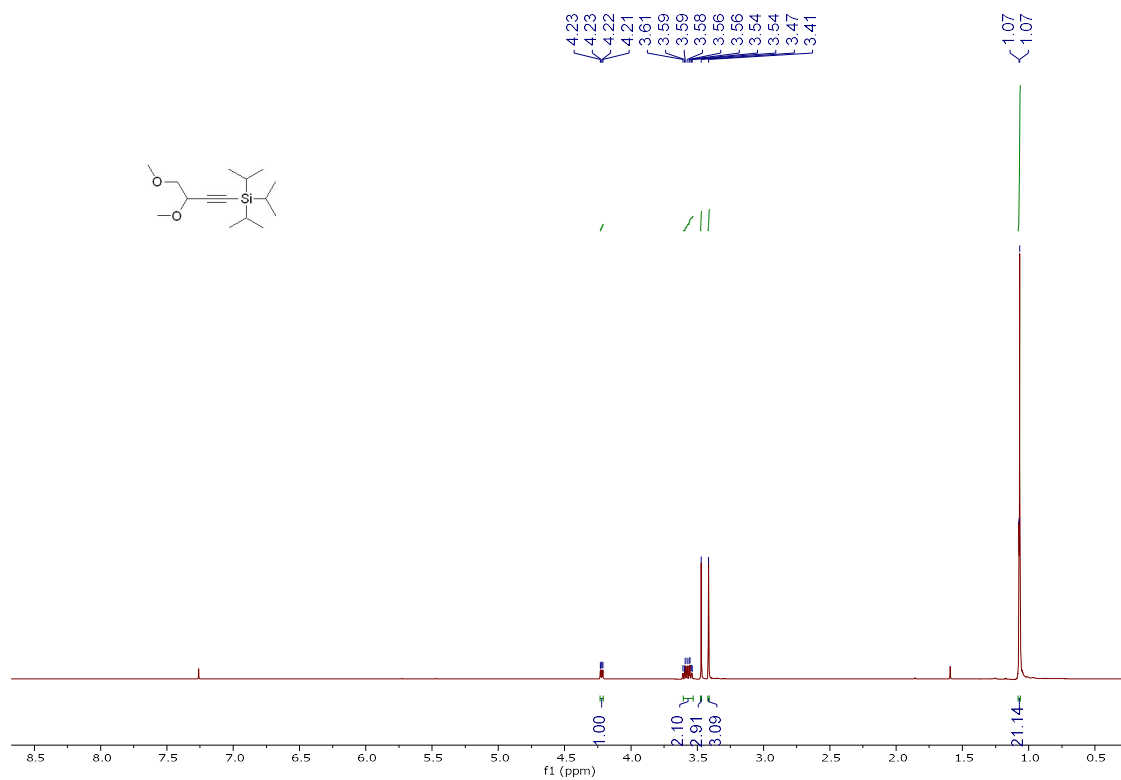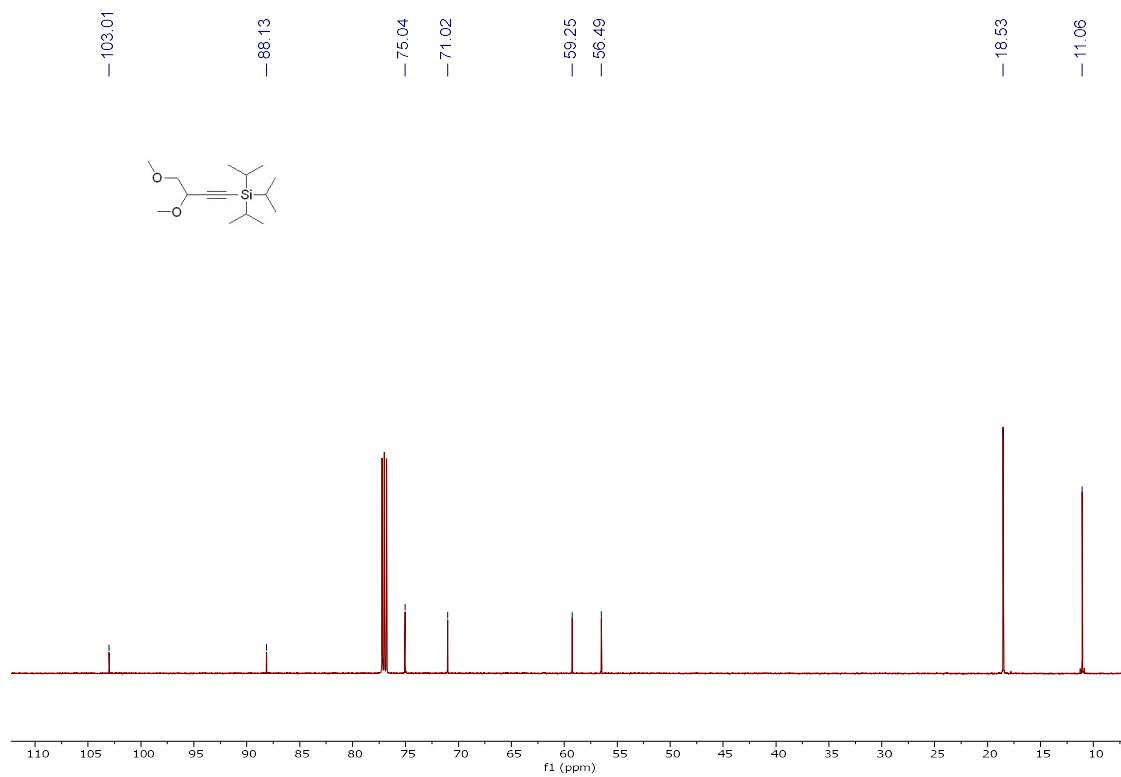

50

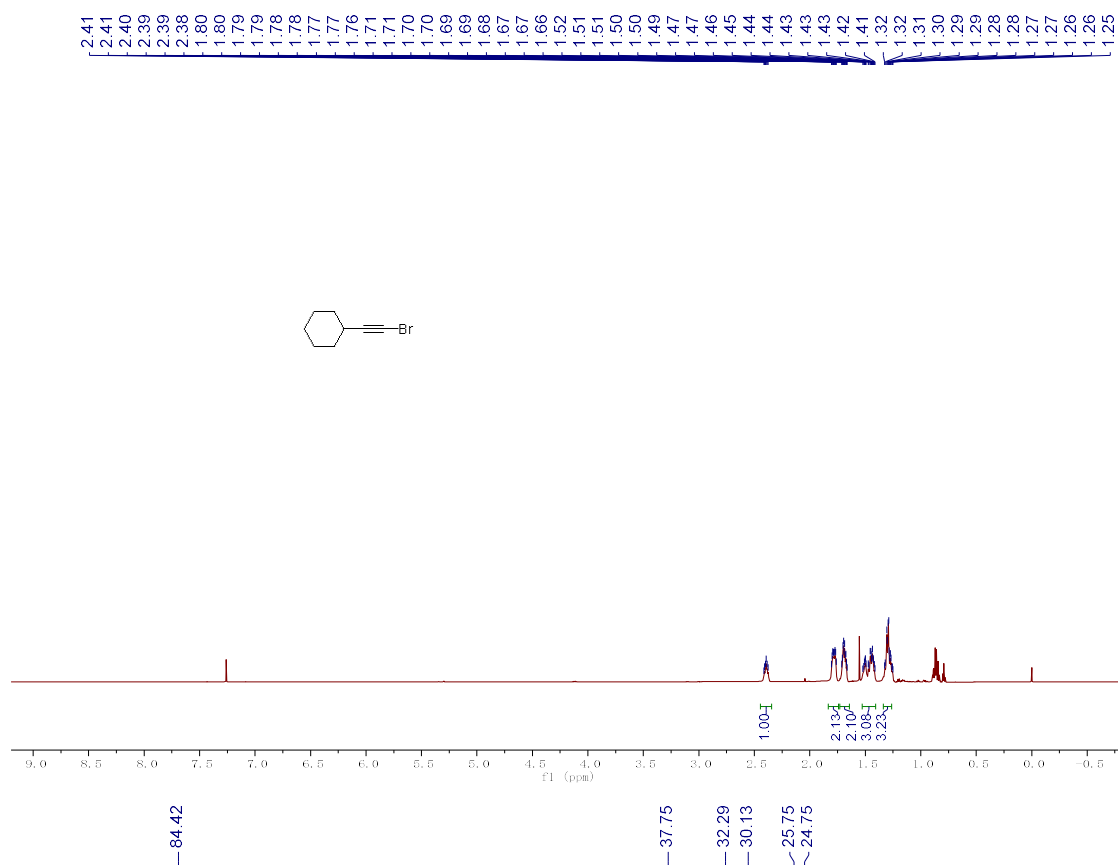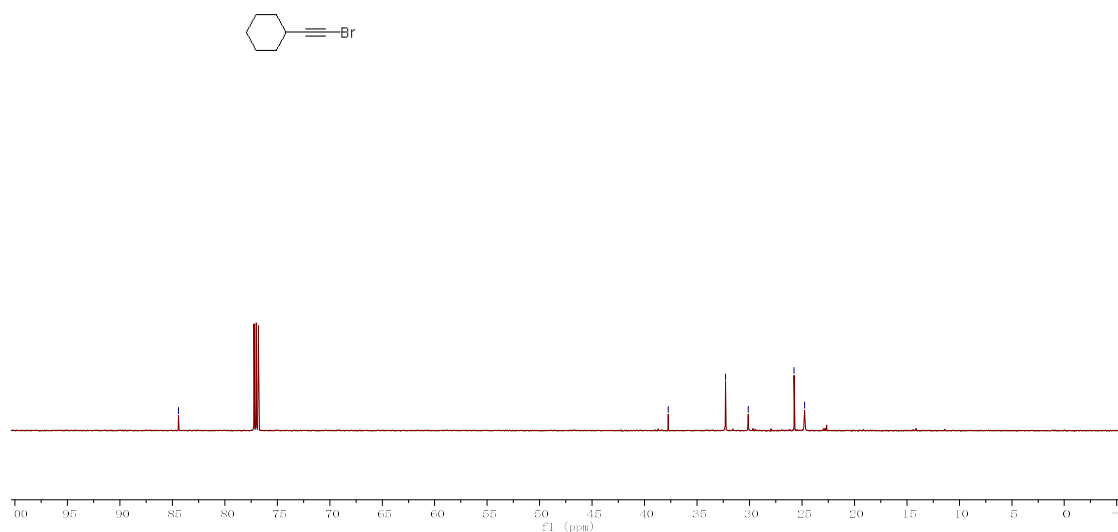

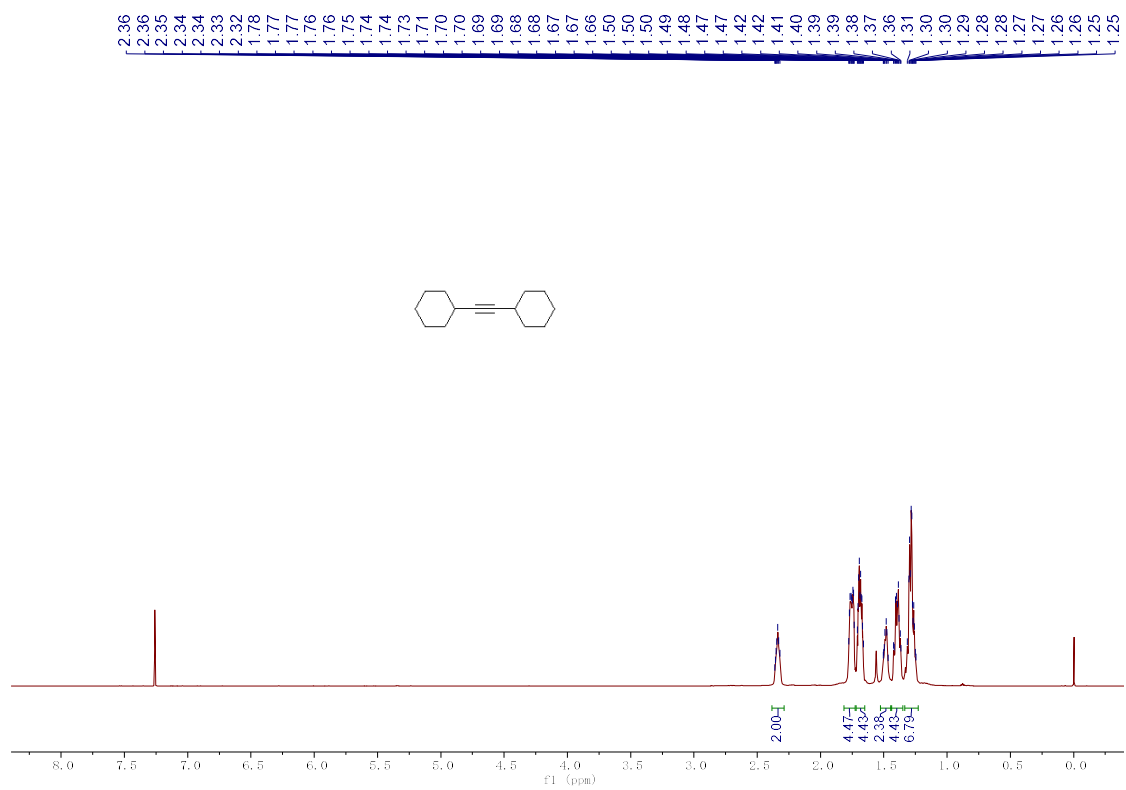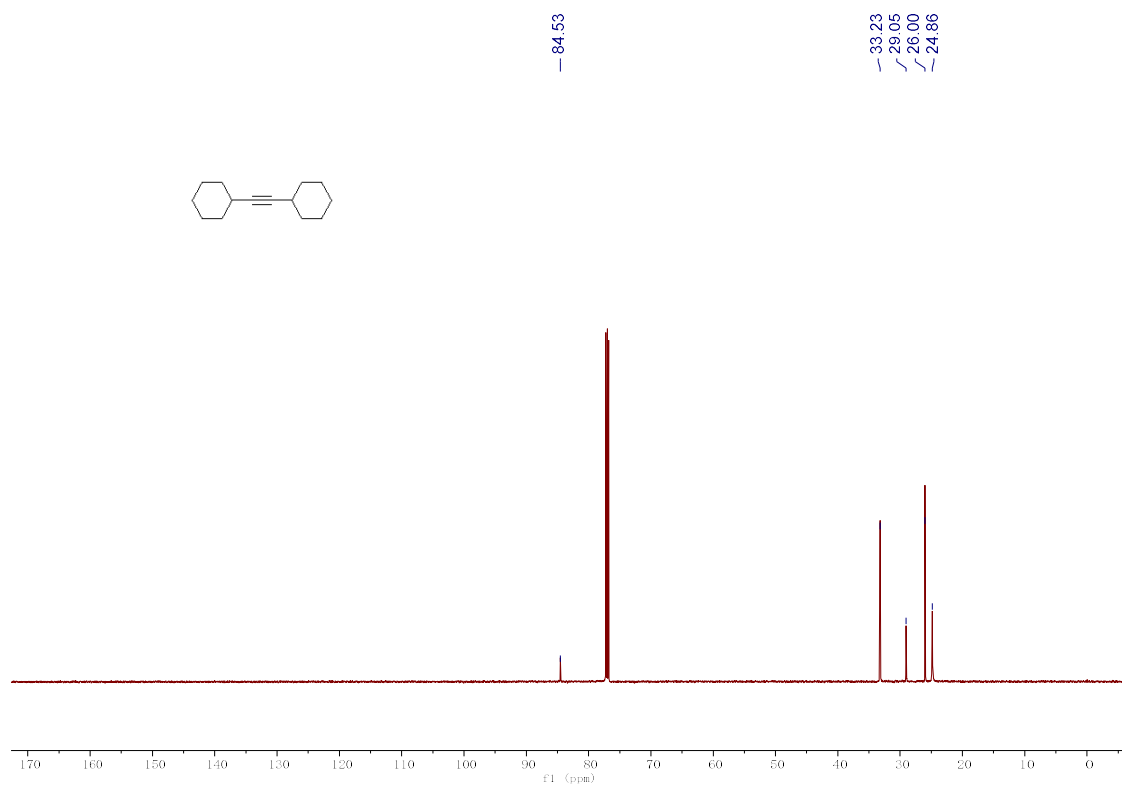

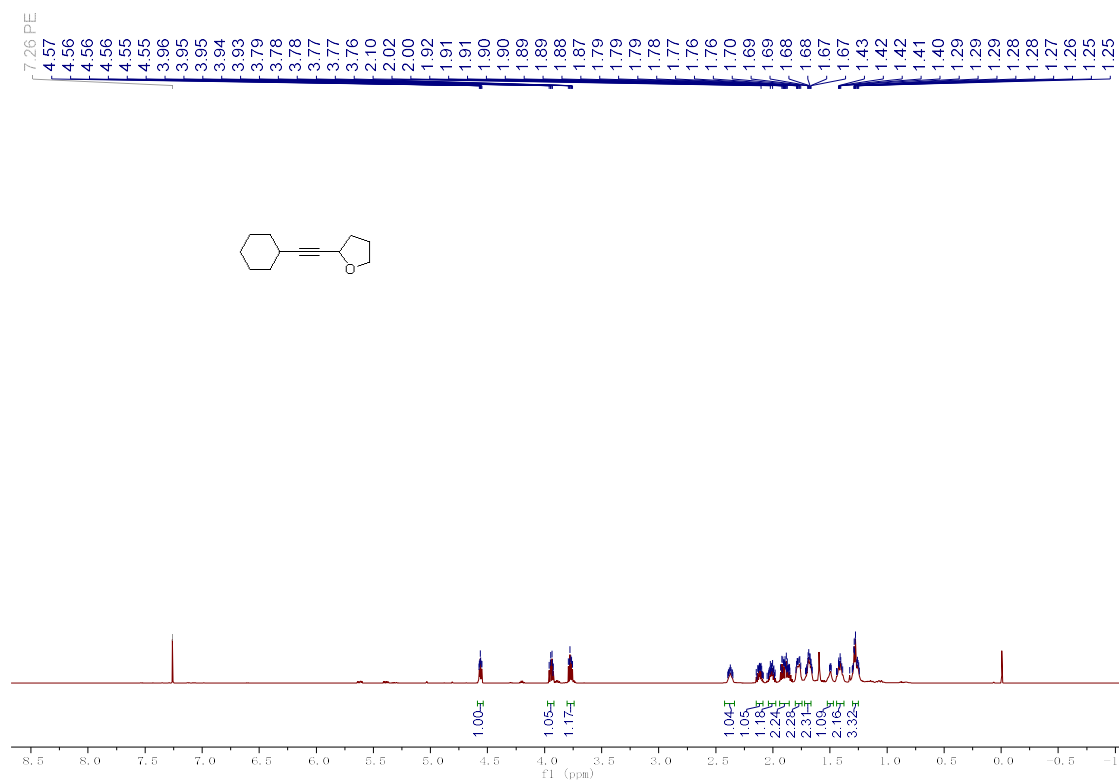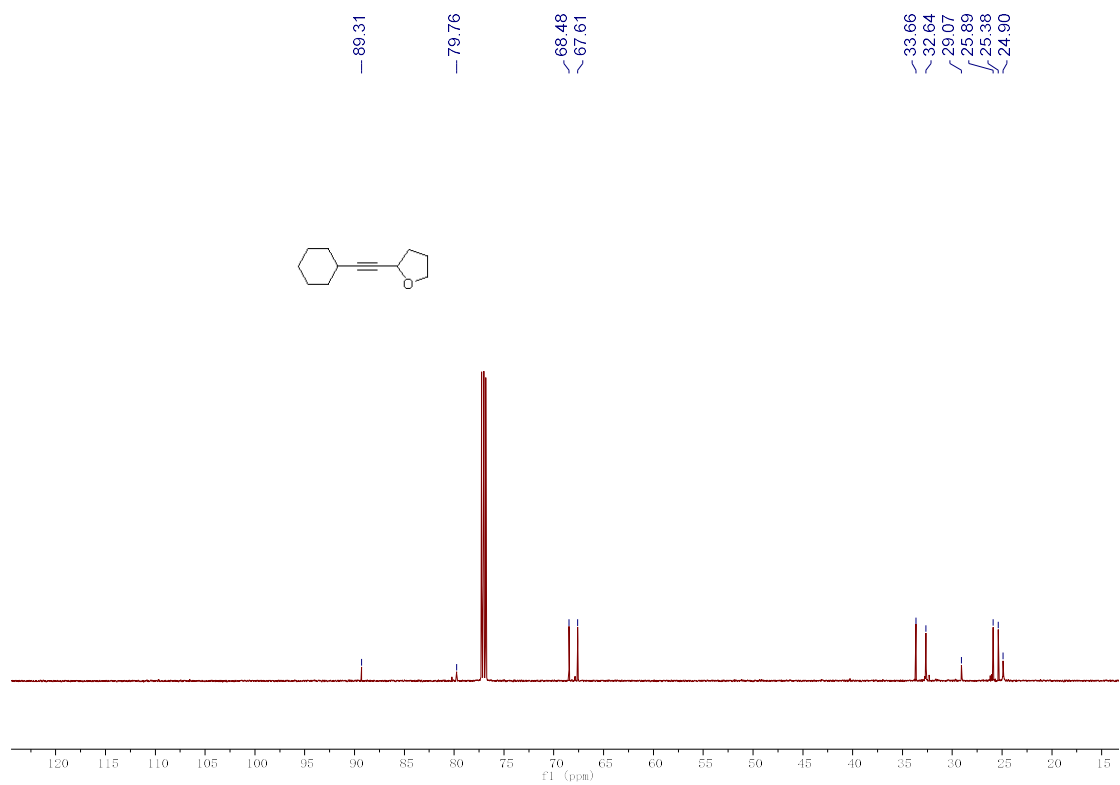



## 8. References

1. D. Mazzarella, A. Pulcinella, L. Bovy, R. Broersma and T. Noël, *Angew. Chem., Int. Ed.*, 2021, **60**, 21277-21282.
2. X. Li and G. Zou, *J. Organomet. Chem.*, 2015, **794**, 136-145.
3. Q. Wu, Y.-J. Mao, K. Zhou, S. Wang, L. Chen, Z.-Y. Xu, S.-J. Lou and D.-Q. Xu, *Chem. Commun.*, 2021, **57**, 4544-4547.
4. J. Amani and G. A. Molander, *J. Org. Chem.*, 2017, **82**, 1856-1863.
5. G. S. Lee, J. Won, S. Choi, M.-H. Baik and S. H. Hong, *Angew. Chem., Int. Ed.*, 2020, **59**, 16933-16942.
6. A. H. Roy, C. P. Lenges and M. Brookhart, *J. Am. Chem. Soc.*, 2007, **129**, 2082-2093.
7. Y.-C. Wong, K. Parthasarathy and C.-H. Cheng, *Org. Lett.*, 2010, **12**, 1736-1739.
8. K. Watanabe, T. Hamada and K. Moriyama, *Org. Lett.*, 2018, **20**, 5803-5807.
9. J. Zhang, D. Xiao, H. Tan and W. Liu, *J. Org. Chem.*, 2020, **85**, 3929-3935.
10. J. Chan Lee and T. Hong, *Synth. Commun.*, 1997, **27**, 4085-4090.
11. Z. H. Zhou, Y. L. Tang, K. Y. Li, B. Liu and C. C. Tang, *Heteroatom Chem.*, 2003, **14**, 603-606.
12. M. Zhang, J. Xie and C. Zhu, *Nat. Commun.*, 2018, **9**, 3517.
13. F. Tinnis, E. Stridfeldt, H. Lundberg, H. Adolfsson and B. Olofsson, *Org. Lett.*, 2015, **17**, 2688-2691.
14. L. Lu, R. Shi, L. Liu, J. Yan, F. Lu and A. Lei, *Chem. - Eur. J.*, 2016, **22**, 14484-14488.
15. W. Jia, L. Zhao, H. Wei, L. Zhu, L. Fu and W. Chen, *Chin. J. Org. Chem.*, 2022, **42**, 1-15.
16. L. Capaldo and D. Ravelli, *Org. Lett.*, 2021, **23**, 2243-2247.
17. Y. Jin, L. Wang, Q. Zhang, Y. Zhang, Q. Liao and C. Duan, *Green Chem.*, 2021, **23**, 9406-9411.
18. K. Matsumoto, M. Nakajima and T. Nemoto, *J. Org. Chem.*, 2020, **85**, 11802-11811.

19. R. Pan, C. Shi, D. Zhang, Y. Tian, S. Guo, H. Yao and A. Lin, *Org. Lett.*, 2019, **21**, 8915-8920.
20. F. Ghiringhelli, L. Nattmann, S. Bognar and M. van Gemmeren, *J. Org. Chem.*, 2019, **84**, 983-993.
